# Supplementary material for: Diketopiperazine Derivatives from the Marine-Derived Actinomycete Streptomyces sp. FXJ7.328
Source: PubMed Central journal article supplement (PMC3705386; doi:10.3390/md11041035), 2013-03-28
Supplement: marinedrugs-11-01035-s001.pdf [file marinedrugs-11-01035-s001.pdf]

# Supplementary Information

## Table of Contents

|                                                                                                                                               |    |
|-----------------------------------------------------------------------------------------------------------------------------------------------|----|
| The 16S rRNA gene sequences data of <i>Streptomyces</i> sp. FXJ7.328                                                                          | 3  |
| The physicochemical data of the known compounds <b>7–10</b>                                                                                   | 3  |
| <b>Figure S1.</b> The <sup>1</sup> H NMR (600 MHz, DMSO- <i>d</i> <sub>6</sub> ) spectrum of compounds <b>1</b> and <b>2</b>                  | 5  |
| <b>Figure S2.</b> The <sup>13</sup> C NMR (150 MHz, DMSO- <i>d</i> <sub>6</sub> ) spectrum of compounds <b>1</b> and <b>2</b>                 | 6  |
| <b>Figure S3.</b> The DEPT (150 MHz, DMSO- <i>d</i> <sub>6</sub> ) spectrum of compounds <b>1</b> and <b>2</b>                                | 7  |
| <b>Figure S4.</b> The <sup>1</sup> H- <sup>1</sup> H COSY (600 MHz, DMSO- <i>d</i> <sub>6</sub> ) spectrum of compounds <b>1</b> and <b>2</b> | 8  |
| <b>Figure S5.</b> The HMQC (600 MHz, DMSO- <i>d</i> <sub>6</sub> ) spectrum of compounds <b>1</b> and <b>2</b>                                | 9  |
| <b>Figure S6.</b> The HMBC (600 MHz, DMSO- <i>d</i> <sub>6</sub> ) spectrum of compounds <b>1</b> and <b>2</b>                                | 10 |
| <b>Figure S7.</b> The NOESY (600 MHz, DMSO- <i>d</i> <sub>6</sub> ) spectrum of compounds <b>1</b> and <b>2</b>                               | 11 |
| <b>Figure S8.</b> The <sup>1</sup> H NMR (600 MHz, DMSO- <i>d</i> <sub>6</sub> ) spectrum of compound <b>3</b>                                | 12 |
| <b>Figure S9.</b> The <sup>13</sup> C NMR (150 MHz, DMSO- <i>d</i> <sub>6</sub> ) spectrum of compound <b>3</b>                               | 13 |
| <b>Figure S10.</b> The DEPT (150 MHz, DMSO- <i>d</i> <sub>6</sub> ) spectrum of compound <b>3</b>                                             | 14 |
| <b>Figure S11.</b> The HMQC (600 MHz, DMSO- <i>d</i> <sub>6</sub> ) spectrum of compound <b>3</b>                                             | 15 |
| <b>Figure S12.</b> The <sup>1</sup> H- <sup>1</sup> H COSY (600 MHz, DMSO- <i>d</i> <sub>6</sub> ) spectrum of compound <b>3</b>              | 16 |
| <b>Figure S13.</b> The HMBC (600 MHz, DMSO- <i>d</i> <sub>6</sub> ) spectrum of compound <b>3</b>                                             | 17 |
| <b>Figure S14.</b> The NOESY (600 MHz, DMSO- <i>d</i> <sub>6</sub> ) spectrum of compound <b>3</b>                                            | 18 |
| <b>Figure S15.</b> The <sup>1</sup> H NMR (600 MHz, DMSO- <i>d</i> <sub>6</sub> ) spectrum of compound <b>4</b>                               | 19 |
| <b>Figure S16.</b> The <sup>13</sup> C NMR (150 MHz, DMSO- <i>d</i> <sub>6</sub> ) spectrum of compound <b>4</b>                              | 20 |
| <b>Figure S17.</b> The DEPT (150 MHz, DMSO- <i>d</i> <sub>6</sub> ) spectrum of compound <b>4</b>                                             | 21 |
| <b>Figure S18.</b> The <sup>1</sup> H- <sup>1</sup> H COSY (600 MHz, DMSO- <i>d</i> <sub>6</sub> ) spectrum of compound <b>4</b>              | 22 |
| <b>Figure S19.</b> The HMQC (600 MHz, DMSO- <i>d</i> <sub>6</sub> ) spectrum of compound <b>4</b>                                             | 23 |
| <b>Figure S20.</b> The HMBC (600 MHz, DMSO- <i>d</i> <sub>6</sub> ) spectrum of compound <b>4</b>                                             | 24 |
| <b>Figure S21.</b> The <sup>1</sup> H NMR (600 MHz, DMSO- <i>d</i> <sub>6</sub> ) spectrum of compound <b>5</b>                               | 25 |
| <b>Figure S22.</b> The <sup>13</sup> C NMR (150 MHz, DMSO- <i>d</i> <sub>6</sub> ) spectrum of compound <b>5</b>                              | 26 |
| <b>Figure S23.</b> The DEPT (150 MHz, DMSO- <i>d</i> <sub>6</sub> ) spectrum of compound <b>5</b>                                             | 27 |
| <b>Figure S24.</b> The <sup>1</sup> H- <sup>1</sup> H COSY (600 MHz, DMSO- <i>d</i> <sub>6</sub> ) spectrum of compound <b>5</b>              | 28 |
| <b>Figure S25.</b> The HMQC (600 MHz, DMSO- <i>d</i> <sub>6</sub> ) spectrum of compound <b>5</b>                                             | 29 |
| <b>Figure S26.</b> The HMBC (600 MHz, DMSO- <i>d</i> <sub>6</sub> ) spectrum of compound <b>5</b>                                             | 30 |
| <b>Figure S27.</b> The NOESY (600 MHz, DMSO- <i>d</i> <sub>6</sub> ) spectrum of compound <b>5</b>                                            | 31 |
| <b>Figure S28.</b> The <sup>1</sup> H NMR (600 MHz, DMSO- <i>d</i> <sub>6</sub> ) spectrum of compound <b>6</b>                               | 32 |
| <b>Figure S29.</b> The <sup>13</sup> C NMR (150 MHz, DMSO- <i>d</i> <sub>6</sub> ) spectrum of compound <b>6</b>                              | 33 |
| <b>Figure S30.</b> The DEPT (150 MHz, DMSO- <i>d</i> <sub>6</sub> ) spectrum of compound <b>6</b>                                             | 34 |
| <b>Figure S31.</b> The <sup>1</sup> H NMR (600 MHz, DMSO- <i>d</i> <sub>6</sub> ) spectrum of ( <i>S</i> )- <b>1</b> MTPA ester ( <b>1a</b> ) | 35 |
| <b>Figure S32.</b> The <sup>1</sup> H NMR (600 MHz, DMSO- <i>d</i> <sub>6</sub> ) spectrum of ( <i>R</i> )- <b>1</b> MTPA ester ( <b>1b</b> ) | 36 |
| <b>Figure S33.</b> The <sup>1</sup> H NMR (600 MHz, DMSO- <i>d</i> <sub>6</sub> ) spectrum of ( <i>S</i> )- <b>2</b> MTPA ester ( <b>2a</b> ) | 37 |
| <b>Figure S34.</b> The <sup>1</sup> H NMR (600 MHz, DMSO- <i>d</i> <sub>6</sub> ) spectrum of ( <i>R</i> )- <b>2</b> MTPA ester ( <b>2b</b> ) | 38 |
| <b>Figure S35.</b> The <sup>1</sup> H NMR (600 MHz, DMSO- <i>d</i> <sub>6</sub> ) spectrum of <i>p</i> -bromobenzoate ( <b>1c</b> )           | 39 |

|                                                                                                                        |    |
|------------------------------------------------------------------------------------------------------------------------|----|
| <b>Figure S36.</b> The DEPTQ (150 MHz, DMSO- <i>d</i> <sub>6</sub> ) spectrum of <i>p</i> -bromobenzoate ( <b>1c</b> ) | 40 |
| <b>Figure S37.</b> The resolution of mixture of <b>1</b> and <b>2</b> by chiral column                                 | 41 |
| <b>Figure S38.</b> Marfey's method applying for compound <b>5</b>                                                      | 42 |
| <b>Figure S39.</b> C <sub>3</sub> Marfey's method applying for compound <b>5</b>                                       | 43 |
| <b>Figure S40.</b> Dose-response histograms of antiviral activity for compound <b>3</b> and Ribavirin                  | 44 |
| <b>Table S1.</b> Cytotoxic, anti-virus, anti-microbial and anti-inflammatory activities of <b>1–10</b>                 | 44 |
| <b>Table S2.</b> The HMBC correlations (H → C) for compounds <b>1–5</b>                                                | 45 |

**The 16S rRNA Gene Sequences Data of *Streptomyces* sp. FXJ7.328**

TCGAAGAAGAAAGCCGCTTCGGTGGTGGATTAGTGGCGAACGGGTGAGTAACACGTGGG  
CAATCTGCCCTGCACTCTGGGACAAGCCCTGGAAACGGGTCTAATACCGGATATGACACG  
GGATCGCATGGTCCGTGTCTGGAAAGCTCCGGCGGTGCAGGATGAGCCCGGGCCTATCAC  
CTTGTTGGTGGGGTGATGGGCCTACCAAGGCGACGACGGGTAGCCGGCCTGAGAGGGCG  
ACCGGCCACACTGGGACTGAGACACGGCCCAGACTCCTACGGGAGGCAGCAGTGGGGAA  
TATTGCACAATGGGCGCAAGCCTGATGCAGCGACGCCGCGTGAGGGGATGACGGCCTTCG  
GGTTGTAAACCTCTTTCAGCAGGGAAGAAGCGCGAGTGACGGTACCTGCAGAAGAAGCA  
CCGGCTAACTACGTGCCAGCAGCCGCGGTAATACGTAGGGTGCGAGCGTTGTCCGGAATT  
ATTGGGCGTAAAGAGCTCGTAGGCGGCTTGTCGCGTCGGATGTGAAAGCCCGGGGCTTAA  
CCCCGGGTCTGCATTCGATACGGGCAGGCTAGAGTTCGGCAGGGGAGATTGGAATTCCTG  
GTGTAGCGGTGAAATGCGCAGATATCAGGAGGAACACCGGTGGCGAAGGCGGATCTCTG  
GGCCGATACTGACGCTGAGGAGCGAAAGCGTGGGGAGCGAACAGGATTAGATACCCTGG  
TAGTCCACGCCGTAAACGTTGGGCACTAGGTGTGGGCGGCATTCCACGTCGTCCGTGCCG  
CAGCTACGCATTAAGATGCCCCGCCTGGGGAGTACGGCCGCAAGGCTAAAACCTCAAAGG  
AATTGACGGGGGCCCGCACAAAGCGGCGGAGCATGTGGCTTAATTCGACGCAACGCGAAG  
AACCTTACCAAGGCTTGACATACACCGGAAAGCCGTAGAGATACGGCCCCCTTGTGGTC  
GGTGTACAGGTGGTGCATGGCTGTCGTCAGCTCGTGTGTCGTGAGATGTTGGGTAAAGTCCC  
GCAACGAGCGCAACCCTT GTCCTGTGTTGCCAGCAACTCCTTTC

## The Physicochemical Data of the Known Compounds 7–10

**Compound 7:** White solid;  $^1\text{H NMR}$  (600 MHz,  $\text{C}_5\text{H}_5\text{N}-d_5$ ):  $\delta$  11.33 (1H, s, H-1), 10.97 (1H, s, H-4), 6.32 (1H, d,  $J = 10.4$  Hz, H-7), 3.21 (1H, m, H-8), 1.09 (6H, d,  $J = 6.6$  Hz,  $\text{CH}_3$ -9/10), 7.32 (1H, s, H-11), 7.65 (2H, d,  $J = 7.6$  Hz, H-13/17), 7.33 (2H, t,  $J = 7.6$  Hz, H-14/16), 7.24 (1H, t,  $J = 7.3$  Hz, H-15).  $^{13}\text{C NMR}$  (150 MHz,  $\text{C}_5\text{H}_5\text{N}-d_5$ ):  $\delta$  156.9 ( $\text{C}_q$ , C-2), 126.5 ( $\text{C}_q$ , C-3), 157.1 ( $\text{C}_q$ , C-5), 125.1 ( $\text{C}_q$ , C-6), 124.0 ( $\text{C}_q$ , C-7), 23.8 (CH, C-8),  $20.7 \times 2$  ( $\text{CH}_3$ , C-9/10), 113.1 (CH, C-11), 133.0 ( $\text{C}_q$ , C-12),  $127.6 \times 2$  (CH, C-13/17),  $127.9 \times 2$  (CH, C-14/16), 126.6 (CH, C-15). ESIMS  $m/z$  257 [ $\text{M} + \text{H}$ ] $^+$ .

**Compound 8:** Yellow solid;  $^1\text{H NMR}$  (600 MHz,  $\text{CDCl}_3$ ):  $\delta$  3.29 (3H, s,  $\text{NCH}_3$ -1), 8.02 (1H, s, H-4), 5.49 (1H, d,  $J = 9.66$  Hz, H-7), 3.76 (1H, m, H-8), 1.08 (6H, d,  $J = 6.6$  Hz,  $\text{CH}_3$ -9/10), 6.98 (1H, s, H-11), 7.38 (2H, d,  $J = 7.5$  Hz, H-13/17), 7.41 (2H, t,  $J = 7.4$  Hz, H-14/16), 7.32 (1H, t,  $J = 7.4$  Hz, H-15).  $^{13}\text{C NMR}$  (150 MHz,  $\text{CDCl}_3$ ):  $\delta$  31.1 ( $\text{CH}_3$ ,  $\text{NCH}_3$ -1), 157.8 ( $\text{C}_q$ , C-2), 125.8 ( $\text{C}_q$ , C-3), 157.6 ( $\text{C}_q$ , C-5), 128.1 ( $\text{C}_q$ , C-6), 134.8 ( $\text{C}_q$ , C-7), 26.8 (CH, C-8),  $24.4 \times 2$  ( $\text{CH}_3$ , C-9/10), 115.8 (CH, C-11), 133.4 ( $\text{C}_q$ , C-12),  $128.5 \times 2$  (CH, C-13/17),  $129.5 \times 2$  (CH, C-14/16), 128.6 (CH, C-15). ESIMS  $m/z$  271 [ $\text{M} + \text{H}$ ] $^+$ .

**Compound 9:** White solid;  $[\alpha]_D^{25} -88$  ( $c$  0.03,  $\text{DMSO}-d_6$ ),  $^1\text{H NMR}$  (600 MHz,  $\text{DMSO}-d_6$ ):  $\delta$  8.50 (1H, s, NH-1), 9.96 (1H, s, NH-4), 3.78 (1H, t,  $J = 3.8$  Hz, H-6), 2.07 (1H, m, H-7), 0.93 (3H, d,  $J = 6.8$  Hz,  $\text{CH}_3$ -8), 0.87 (3H, d,  $J = 6.6$  Hz,  $\text{CH}_3$ -9), 6.66 (1H, s, H-10), 7.45 (2H, d,  $J = 7.6$  Hz, H-12/16), 7.39 (2H, t,  $J = 7.6$  Hz, H-13/15), 7.29 (1H, t,  $J = 7.4$  Hz, H-14).  $^{13}\text{C NMR}$  (150 MHz,  $\text{DMSO}-d_6$ ):  $\delta$  161.2 ( $\text{C}_q$ , C-2), 127.1 ( $\text{C}_q$ , C-3), 167.2 ( $\text{C}_q$ , C-5), 61.1 (CH, C-6), 34.1 (CH, C-7), 18.7 ( $\text{CH}_3$ , C-8), 17.5 ( $\text{CH}_3$ , C-9), 114.9 (CH, C-10), 133.8 ( $\text{C}_q$ , C-11),  $129.6 \times 2$  (CH, C-12/16),  $129.3 \times 2$  (CH, C-13/15), 128.6 (CH, C-14). ESIMS  $m/z$  245 [ $\text{M} + \text{H}$ ] $^+$ .

**Compound 10:** Yellow solid;  $^1\text{H NMR}$  (600 MHz,  $\text{CDCl}_3$ ):  $\delta$  3.21 (3H, s,  $\text{NCH}_3$ -1), 9.67 (1H, s, H-4), 5.47 (1H, d,  $J = 10.4$  Hz, H-7), 3.81 (1H, m, H-8), 1.10 (6H, d,  $J = 6.7$  Hz,  $\text{CH}_3$ -9/10), 6.46 (1H, s, H-11), 7.52 (2H, d,  $J = 7.6$  Hz, H-13/17), 7.33 (2H, t,  $J = 7.6$  Hz, H-14/16), 7.27 (1H, t,  $J = 7.4$  Hz, H-15).  $^{13}\text{C NMR}$  (150 MHz,  $\text{CDCl}_3$ ):  $\delta$  31.1 ( $\text{CH}_3$ ,  $\text{NCH}_3$ -1), 156.9 ( $\text{C}_q$ , C-2), 125.4 ( $\text{C}_q$ , C-3), 159.9 ( $\text{C}_q$ , C-5), 128.1 ( $\text{C}_q$ , C-6), 134.5 (CH, C-7), 26.8 (CH, C-8),  $23.4 \times 2$  ( $\text{CH}_3$ , C-9/10), 122.4 (CH, C-11), 134.1 ( $\text{C}_q$ , C-12),  $127.9 \times 2$  (CH, C-13/17),  $130.1 \times 2$  (CH, C-14/16), 128.4 (CH, C-15). ESIMS  $m/z$  271 [ $\text{M} + \text{H}$ ] $^+$ .

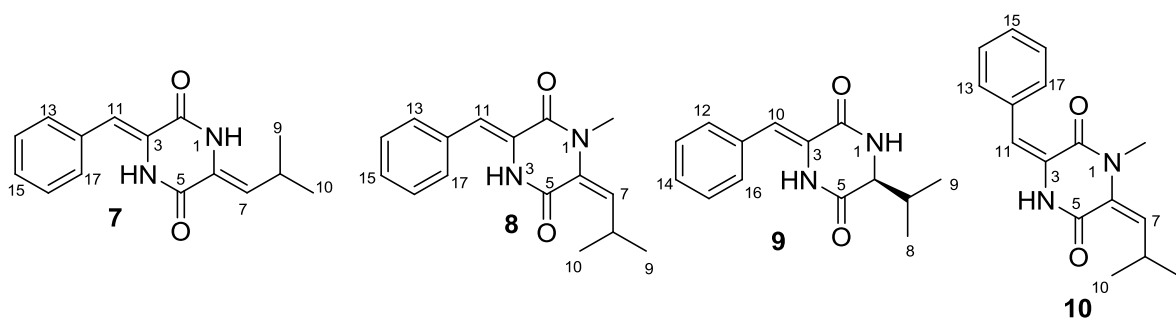



Figure S2. The  $^{13}\text{C}$  NMR (150 MHz,  $\text{DMSO-}d_6$ ) spectrum of compounds 1 and 2.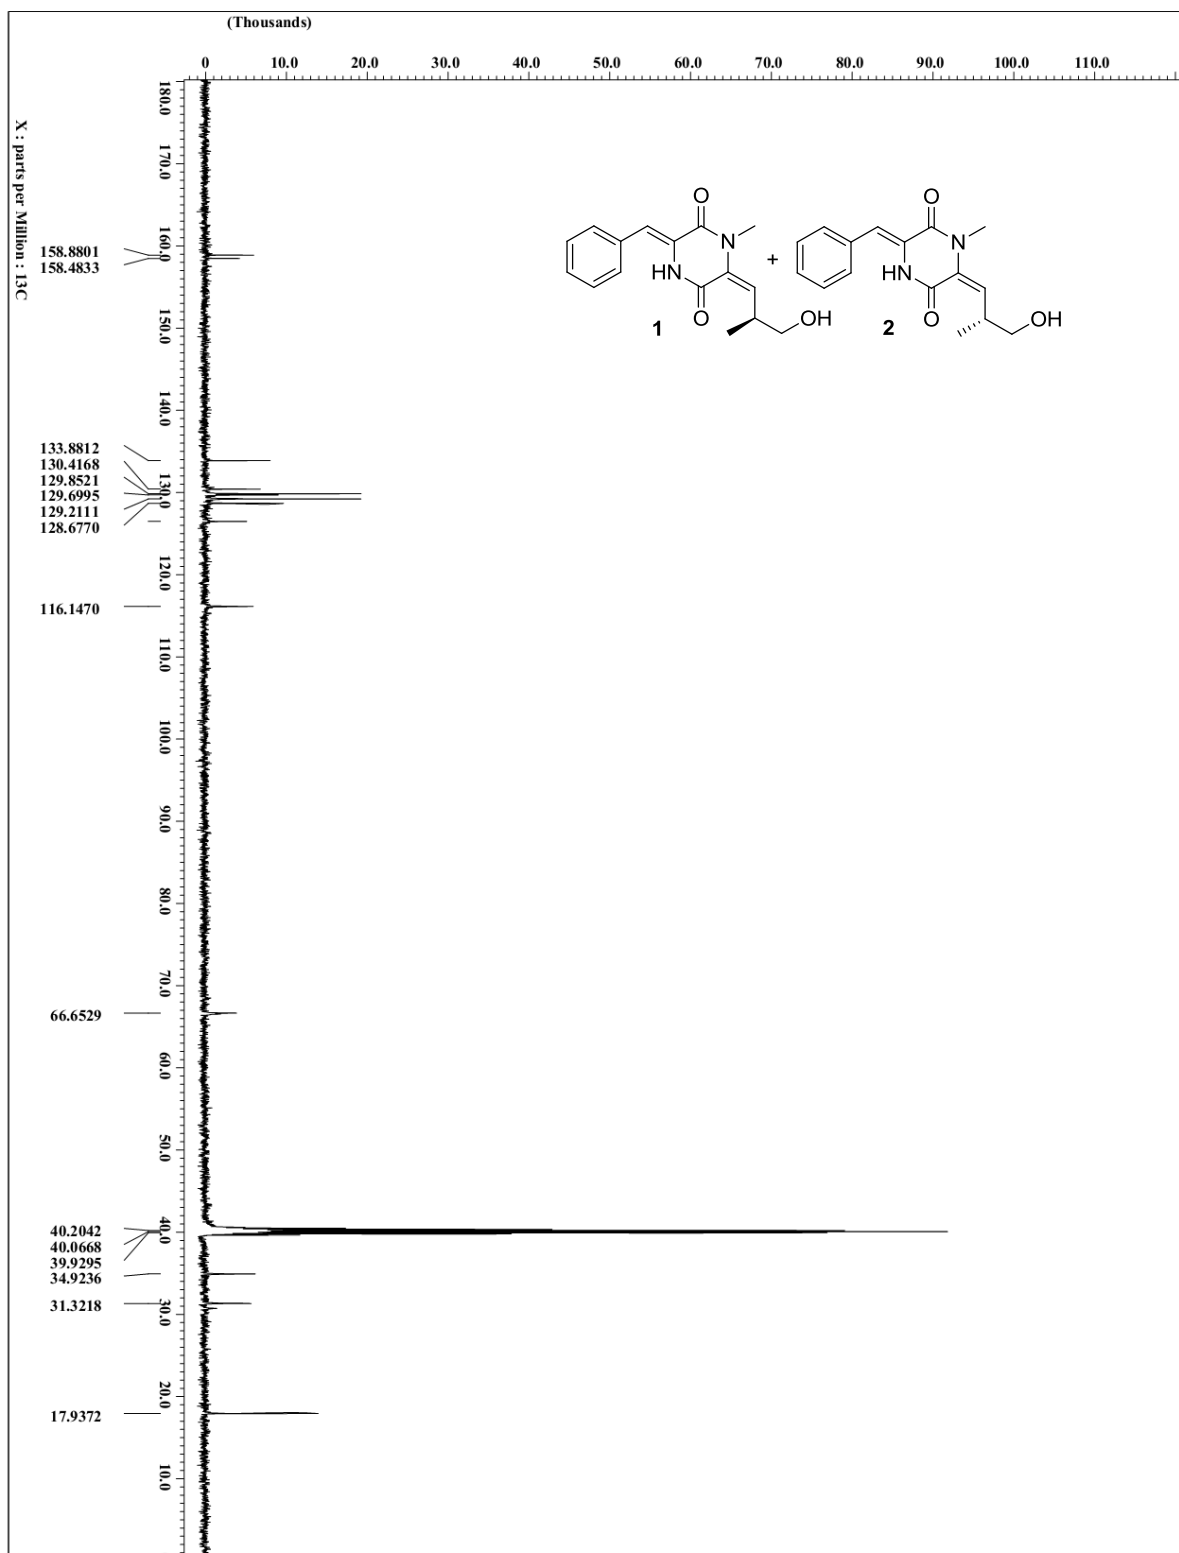

Figure S3. The DEPT (150 MHz, DMSO- $d_6$ ) spectrum of compounds 1 and 2.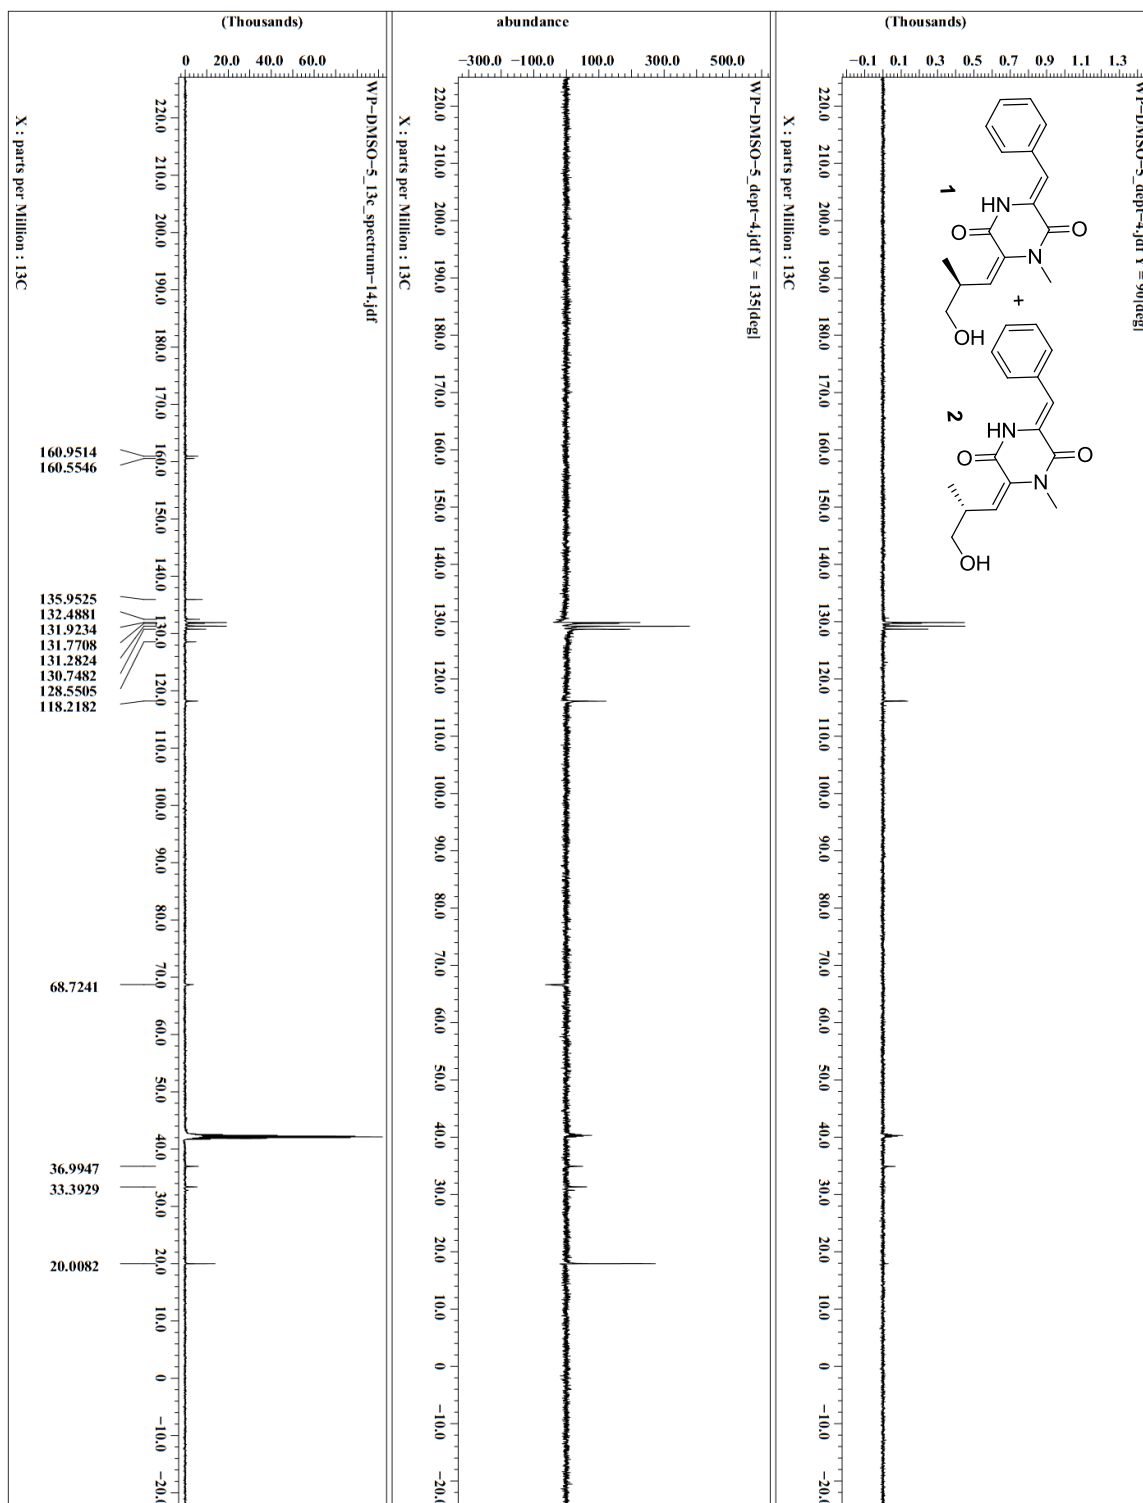

**Figure S4.** The  $^1\text{H}$ - $^1\text{H}$  COSY (600 MHz,  $\text{DMSO-}d_6$ ) spectrum of compounds **1** and **2**.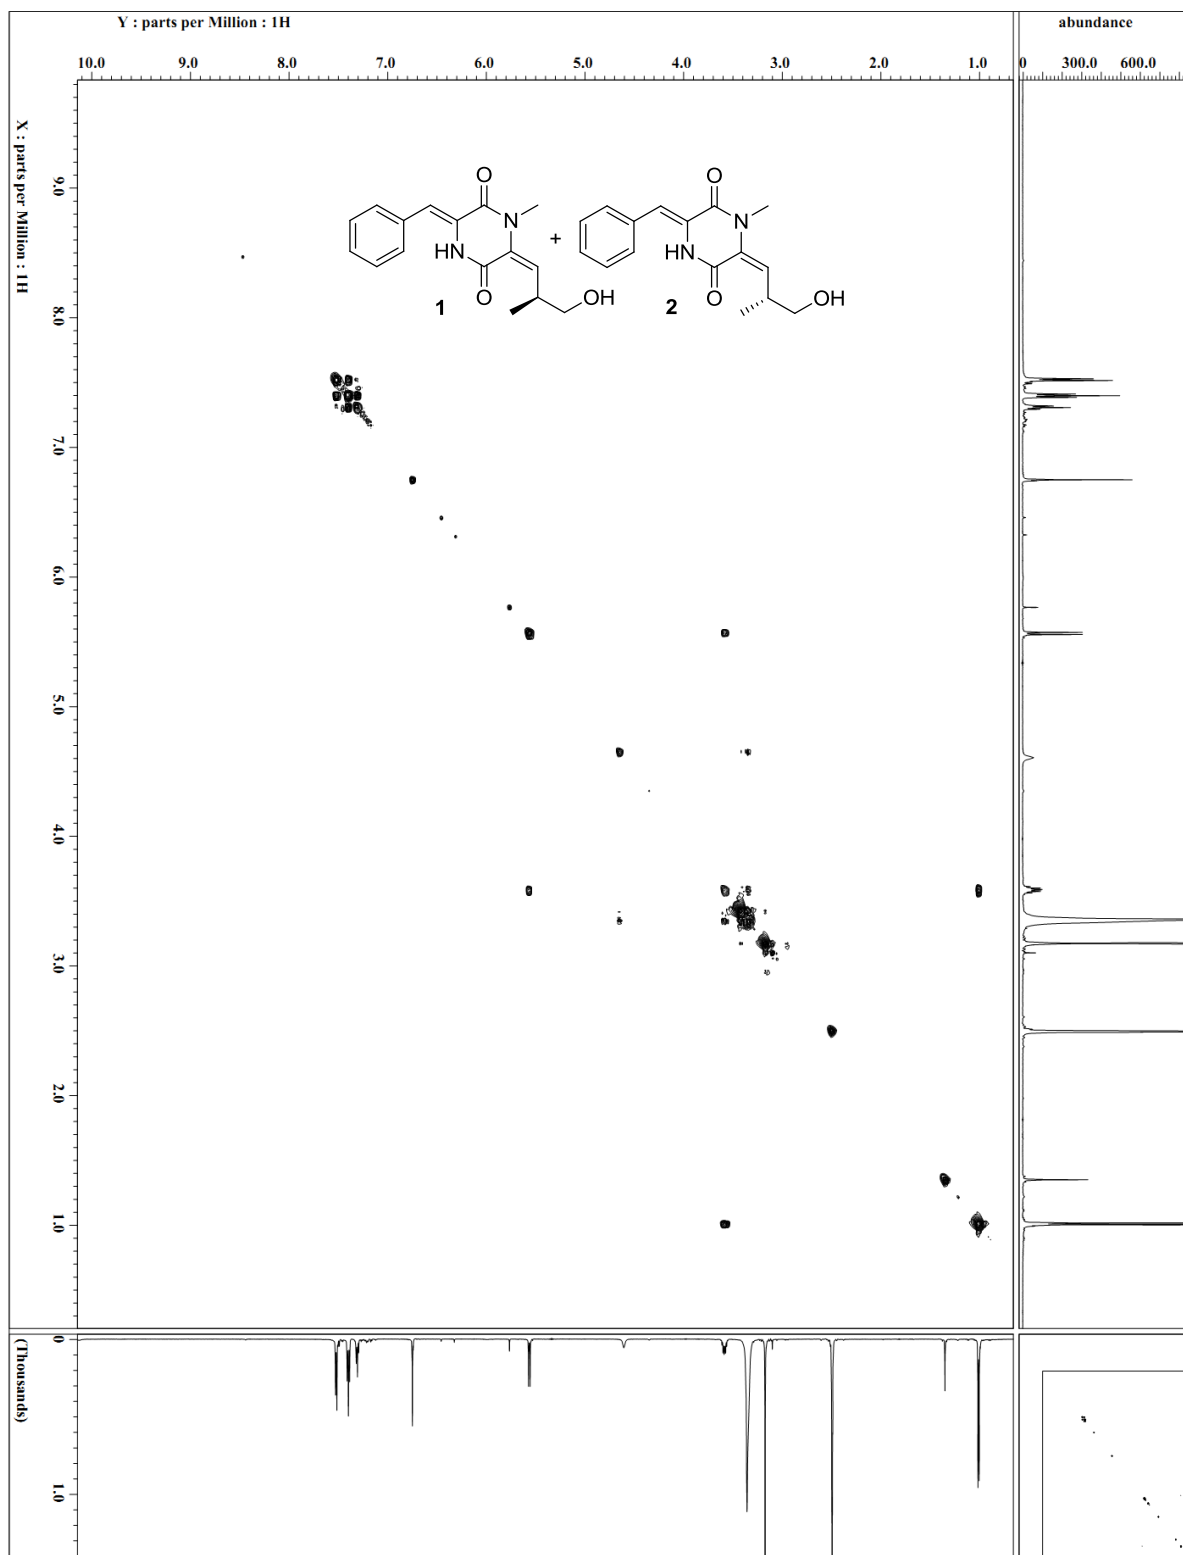



**Figure S5.** The HMQC (600 MHz, DMSO-*d*<sub>6</sub>) spectrum of compounds **1** and **2**.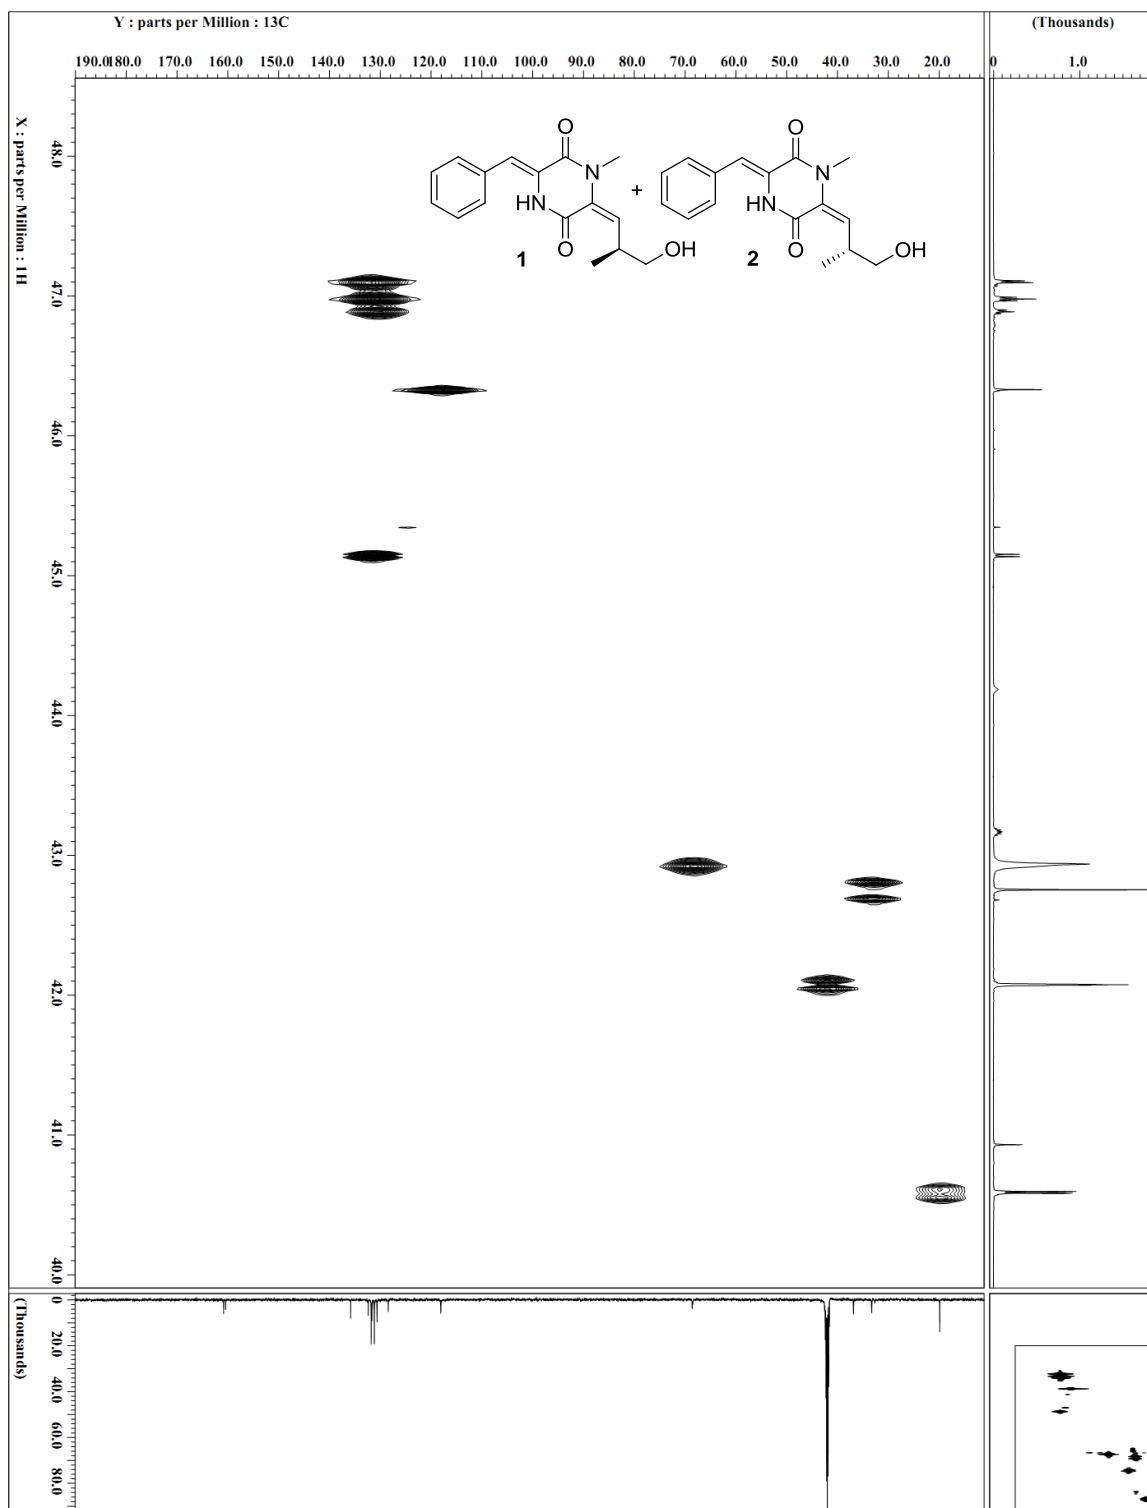

**Figure S6.** The HMBC (600 MHz, DMSO-*d*<sub>6</sub>) spectrum of compounds **1** and **2**.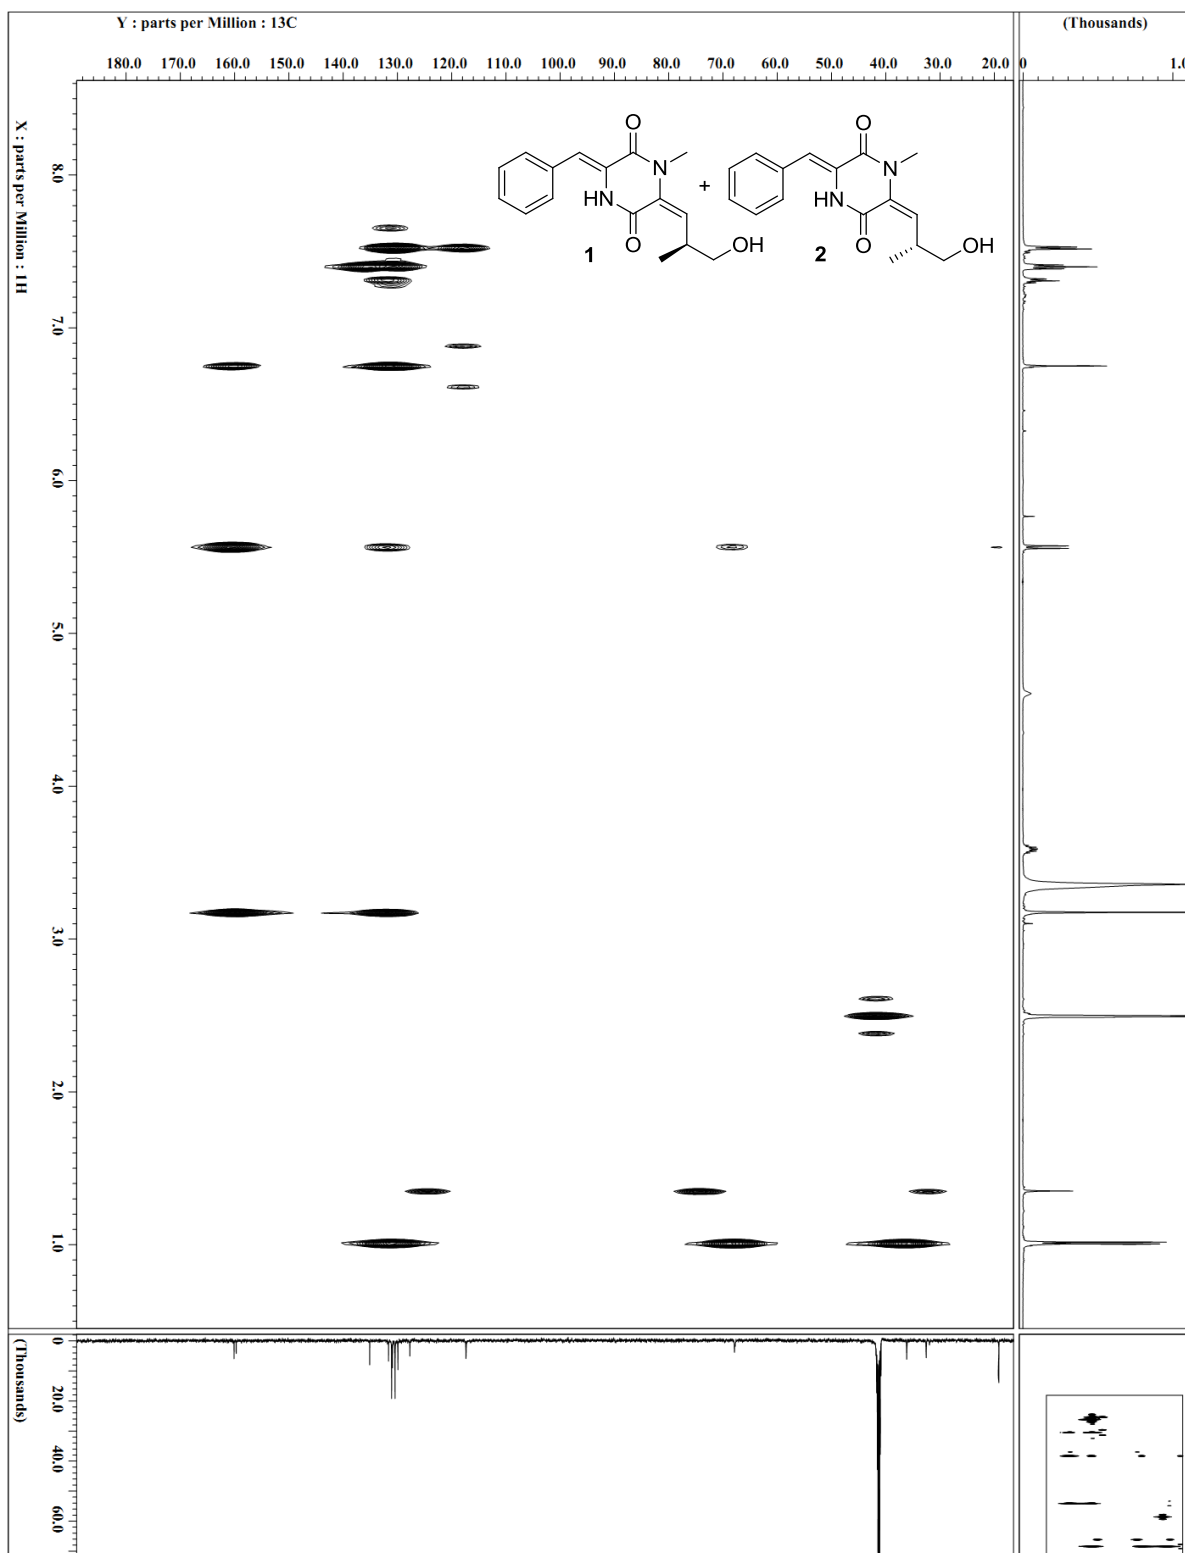

**Figure S7.** The NOESY (600 MHz, DMSO-*d*<sub>6</sub>) spectrum of compounds **1** and **2**.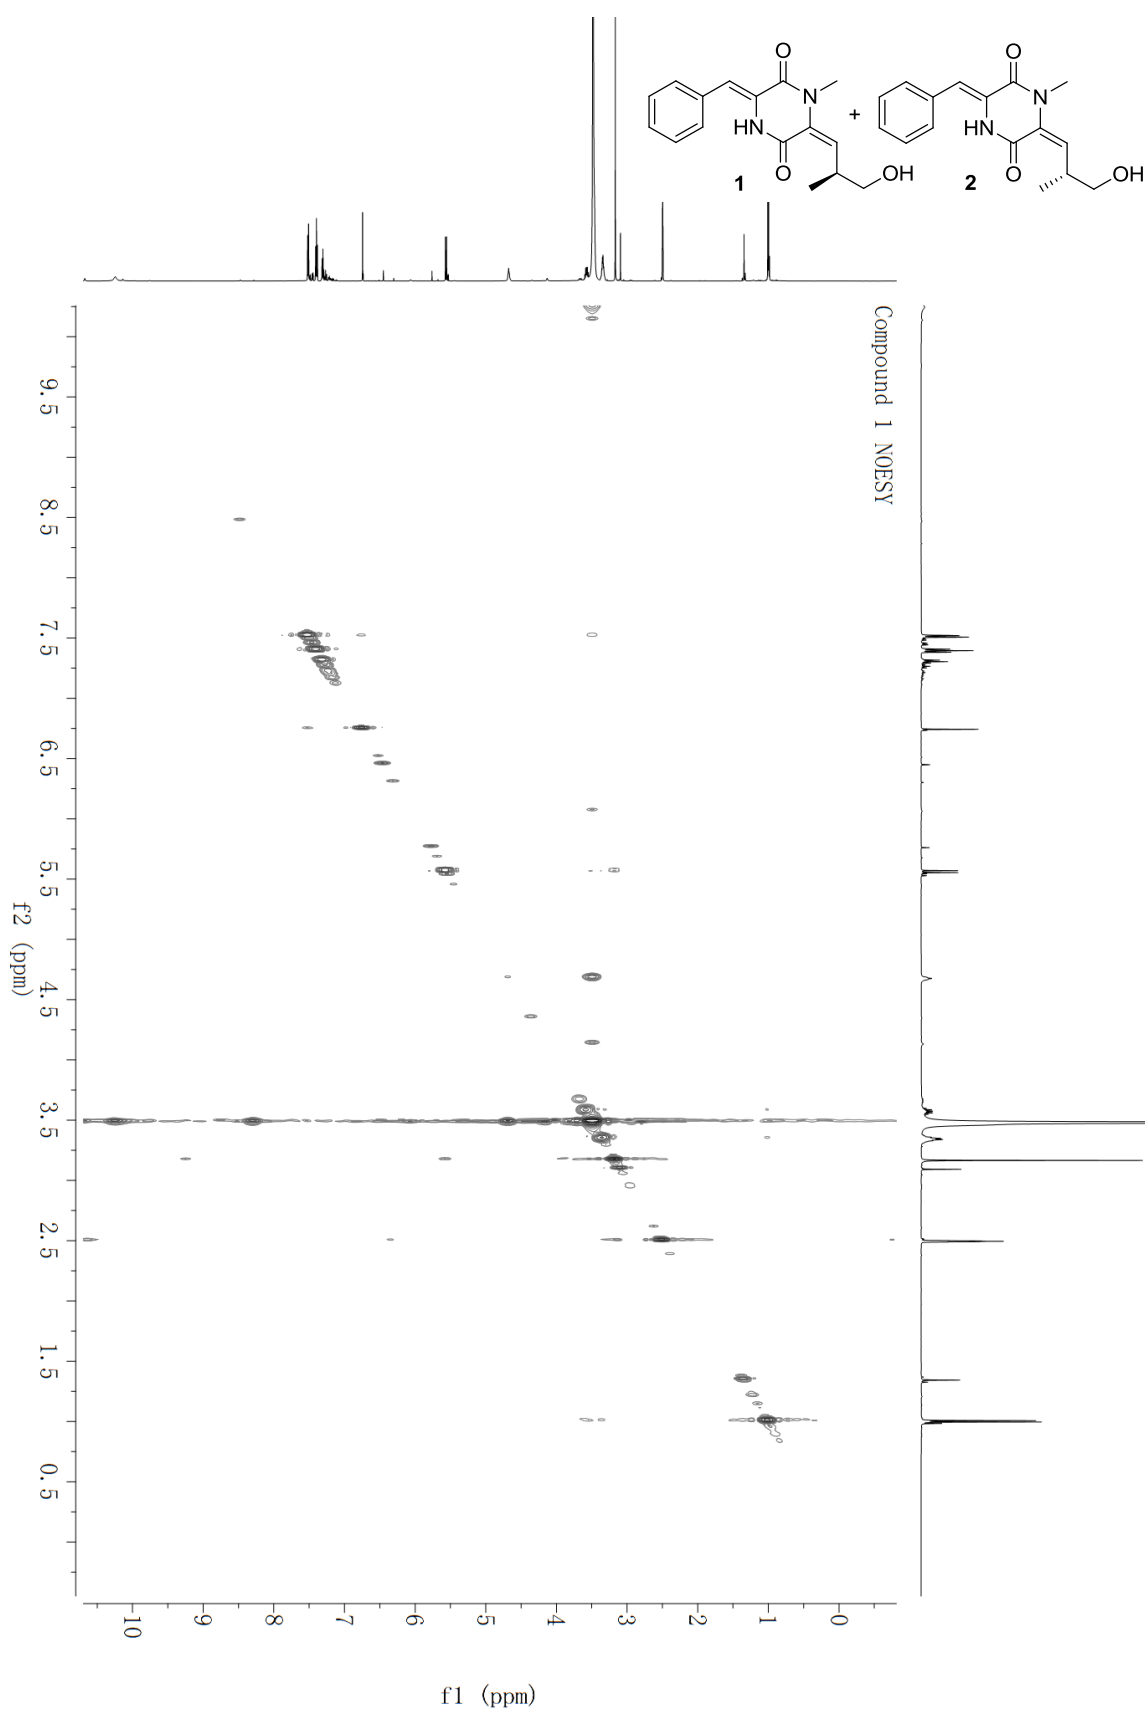

**Figure S8.** The  $^1\text{H}$  NMR (600 MHz,  $\text{DMSO-}d_6$ ) spectrum of compound **3**.

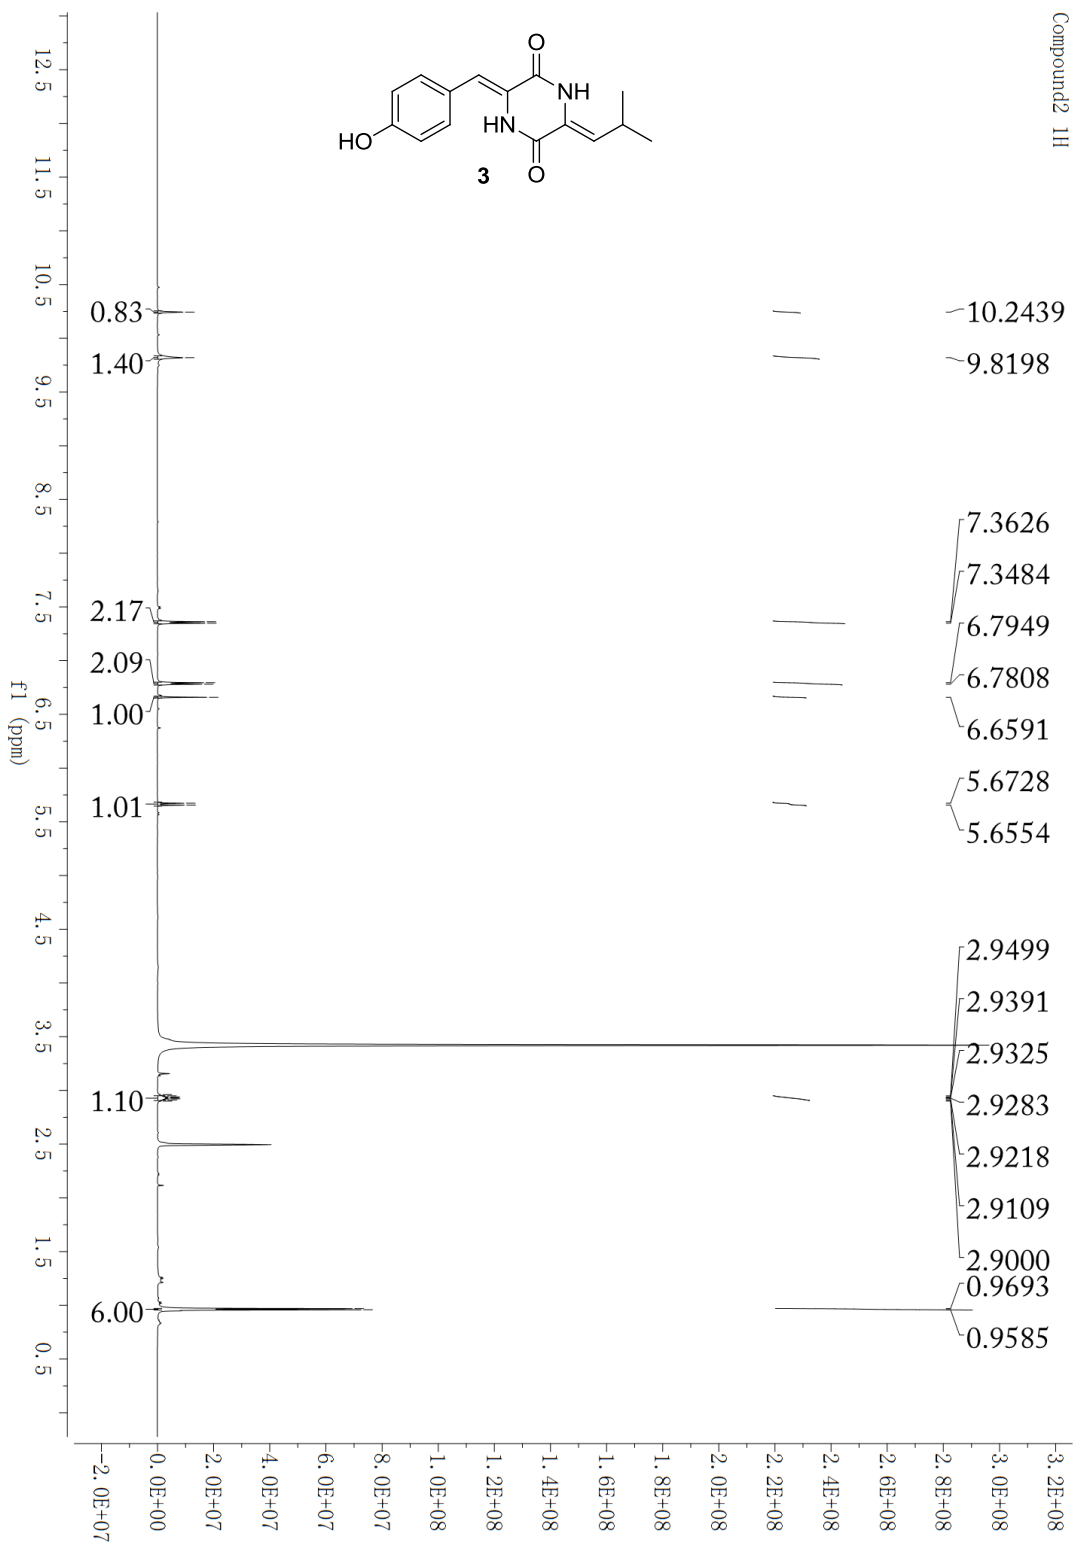

**Figure S9.** The  $^{13}\text{C}$  NMR (150 MHz,  $\text{DMSO-}d_6$ ) spectrum of compound **3**.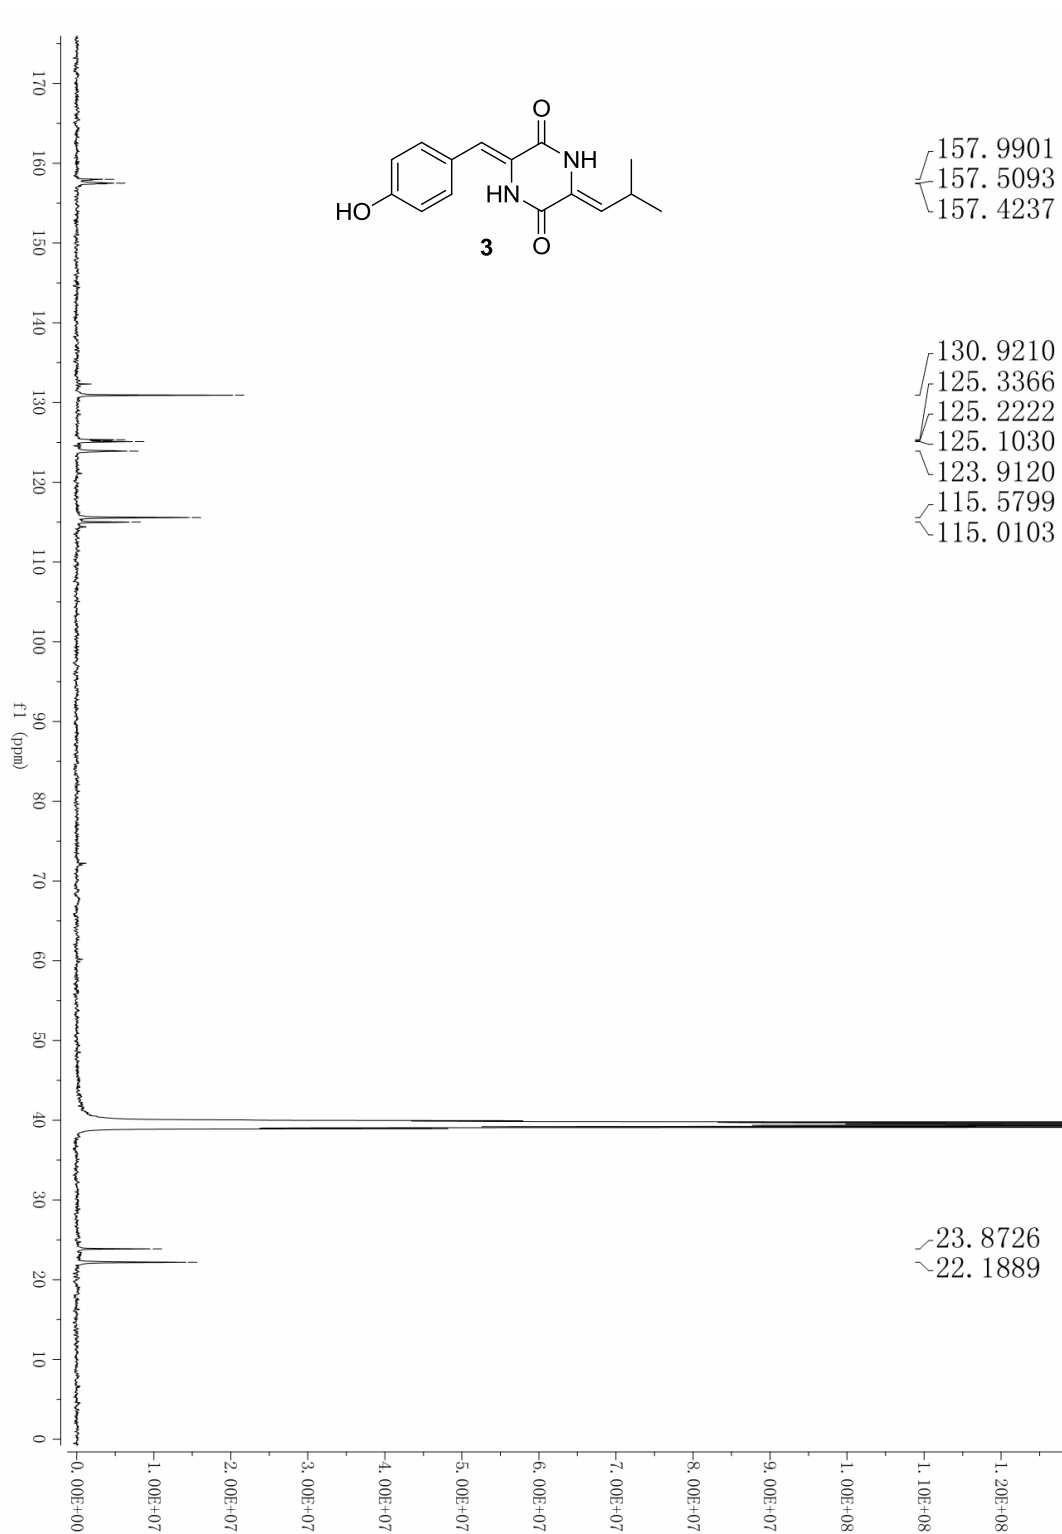

**Figure S10.** The DEPT (150 MHz, DMSO-*d*<sub>6</sub>) spectrum of compound **3**.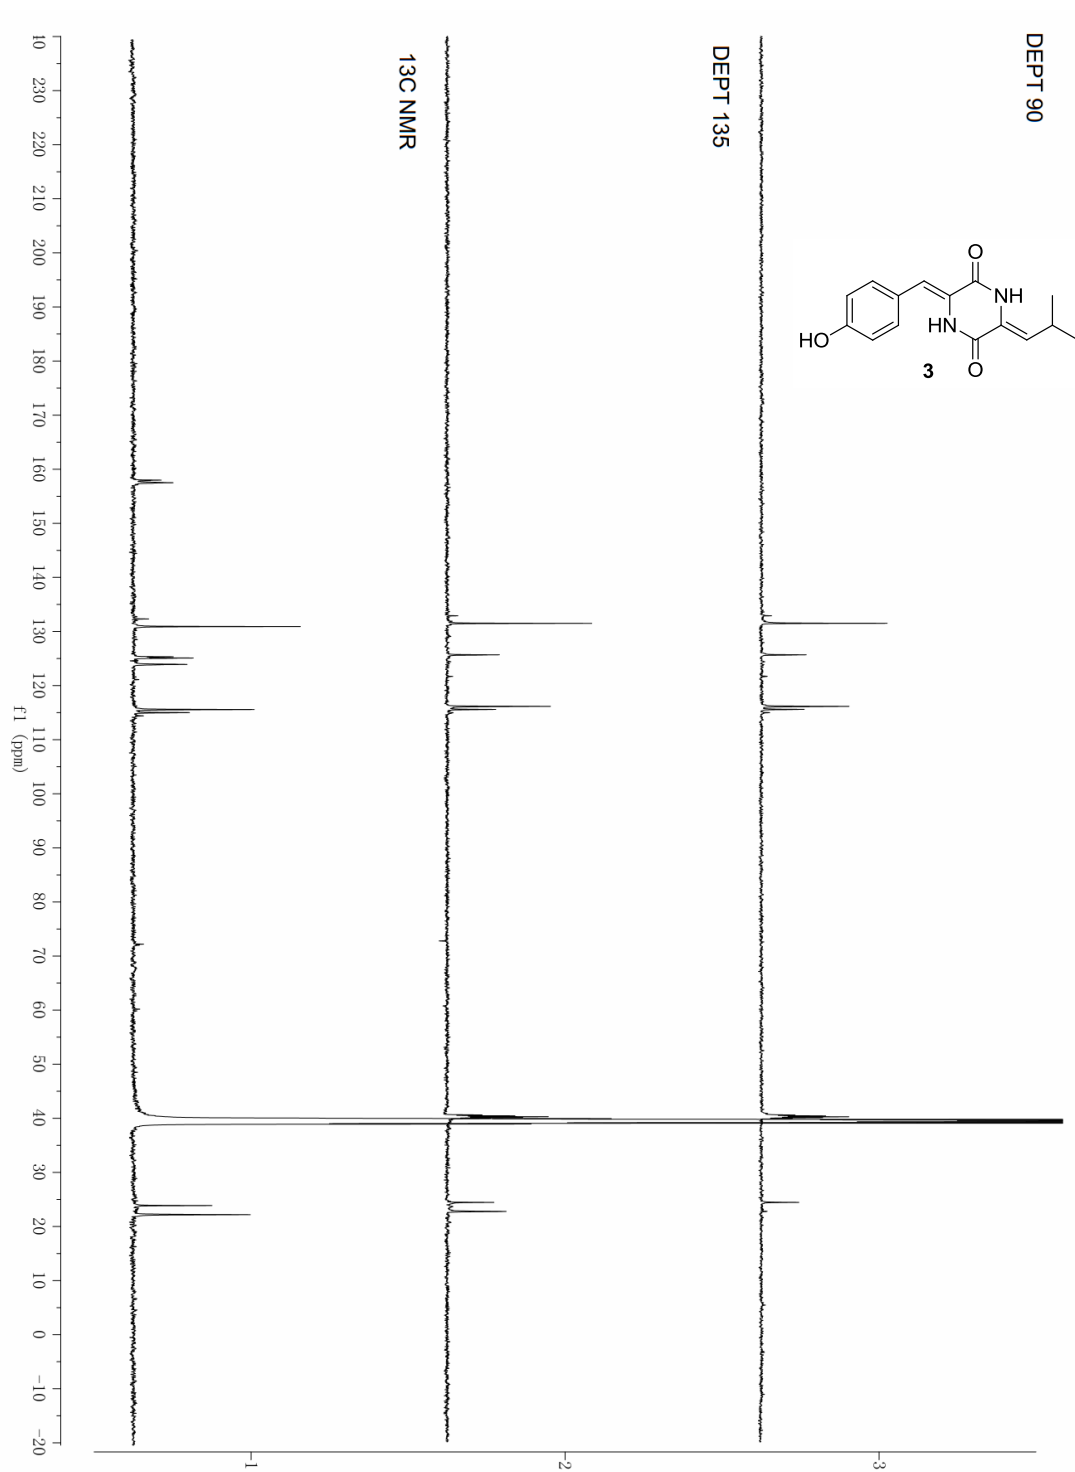

**Figure S11.** The HMQC (6000 MHz, DMSO- $d_6$ ) spectrum of compound **3**.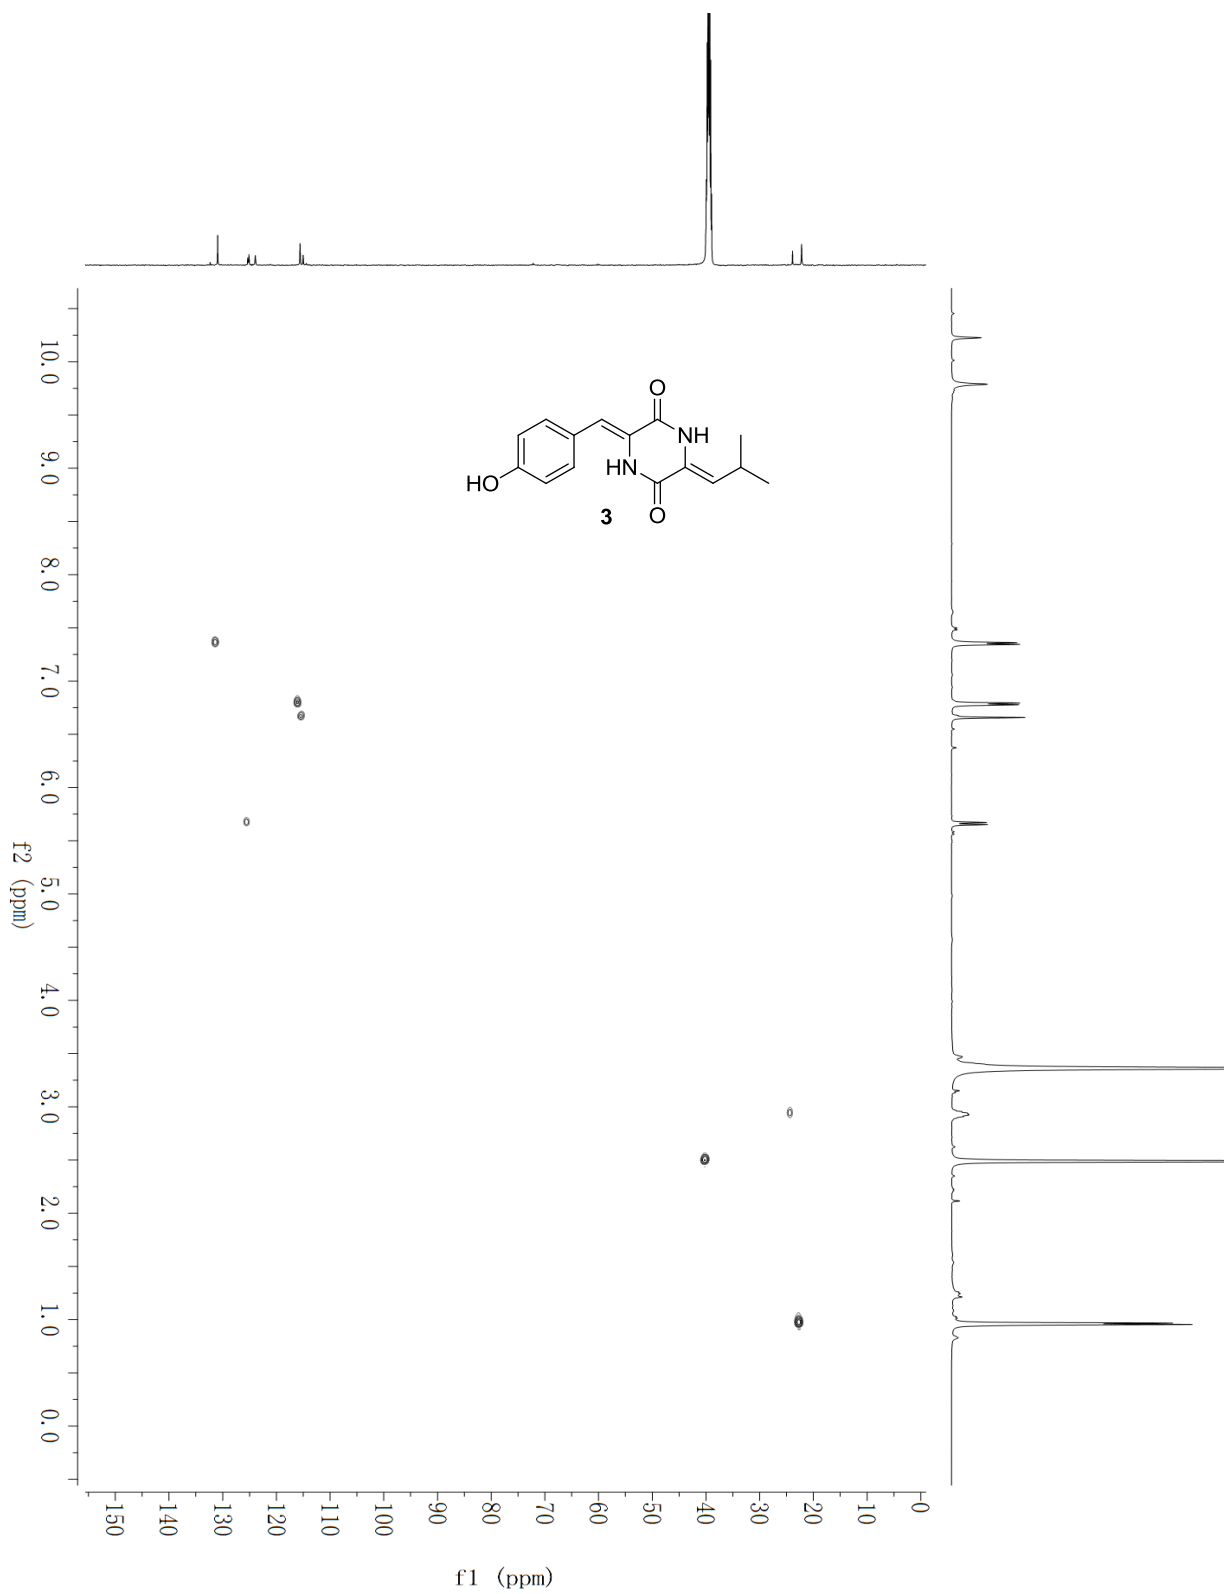

**Figure S12.** The  $^1\text{H}$ - $^1\text{H}$  COSY (600 MHz,  $\text{DMSO-}d_6$ ) spectrum of compound **3**.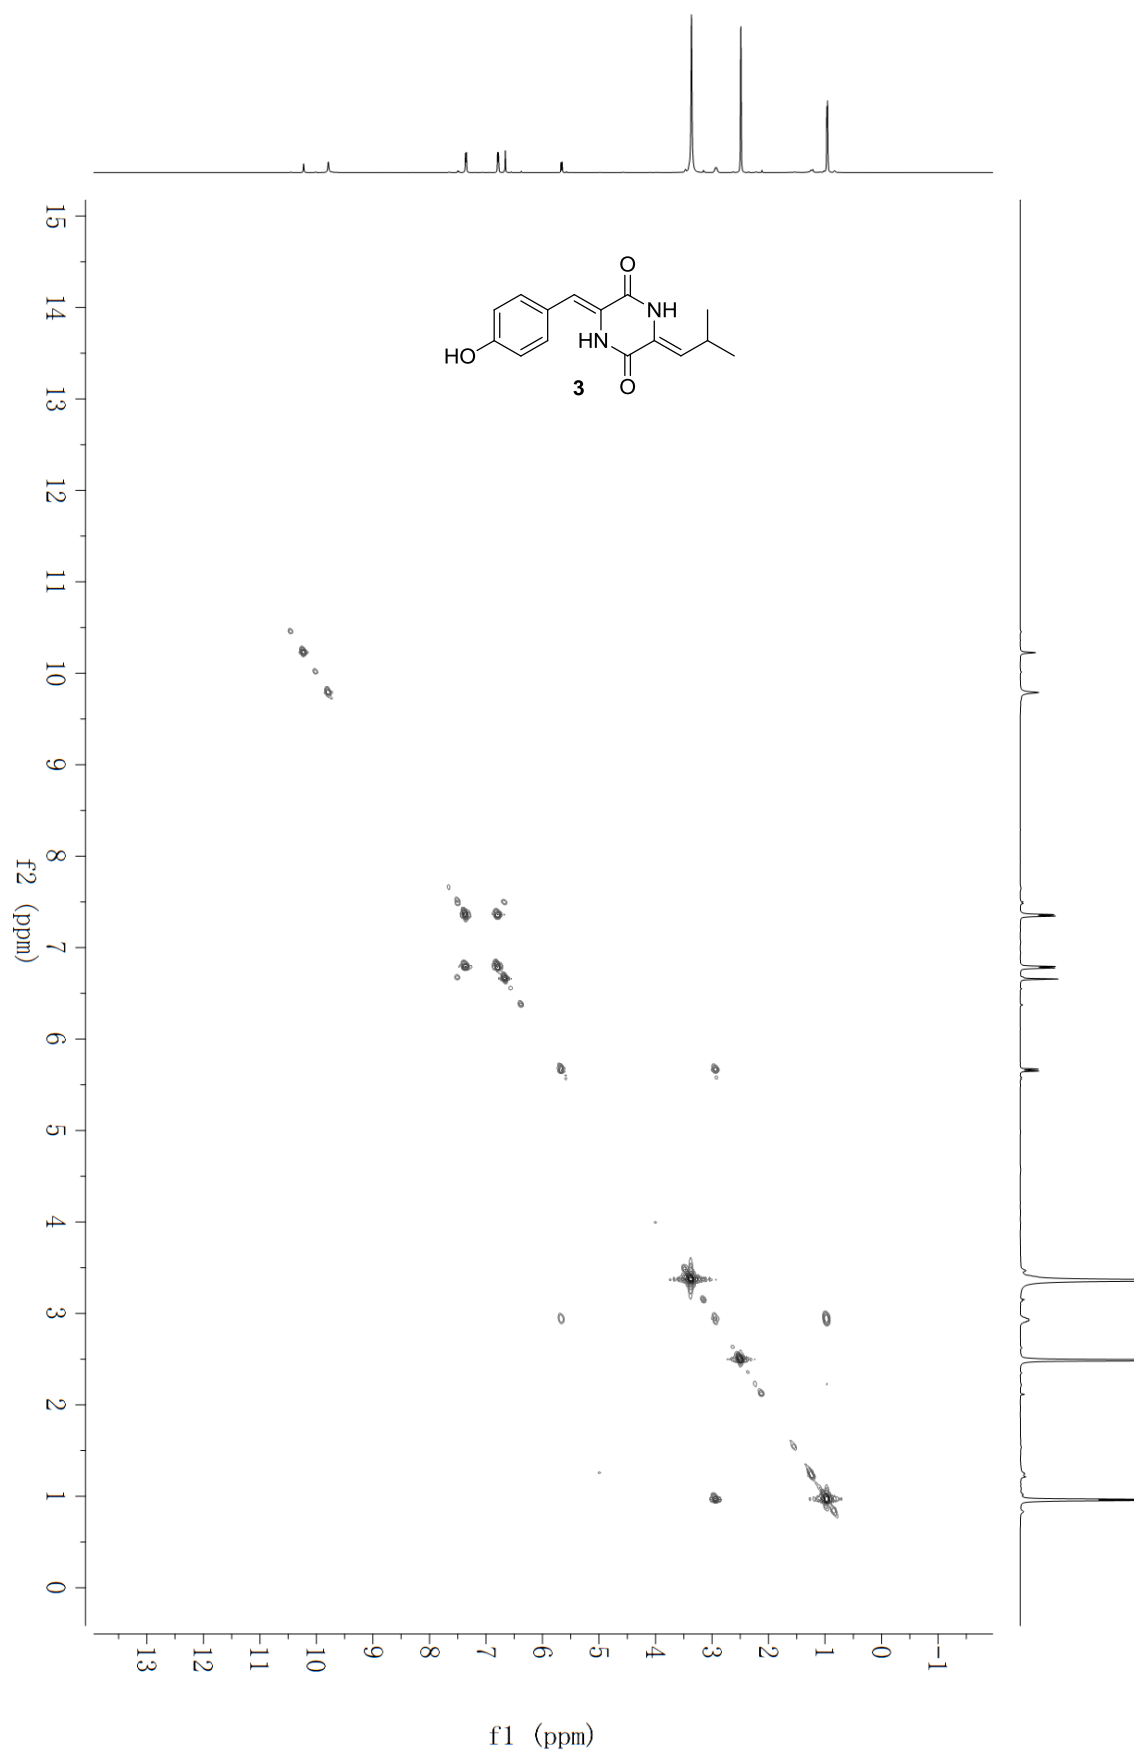



**Figure S13.** The HMBC (600 MHz, DMSO- $d_6$ ) spectrum of compound **3**.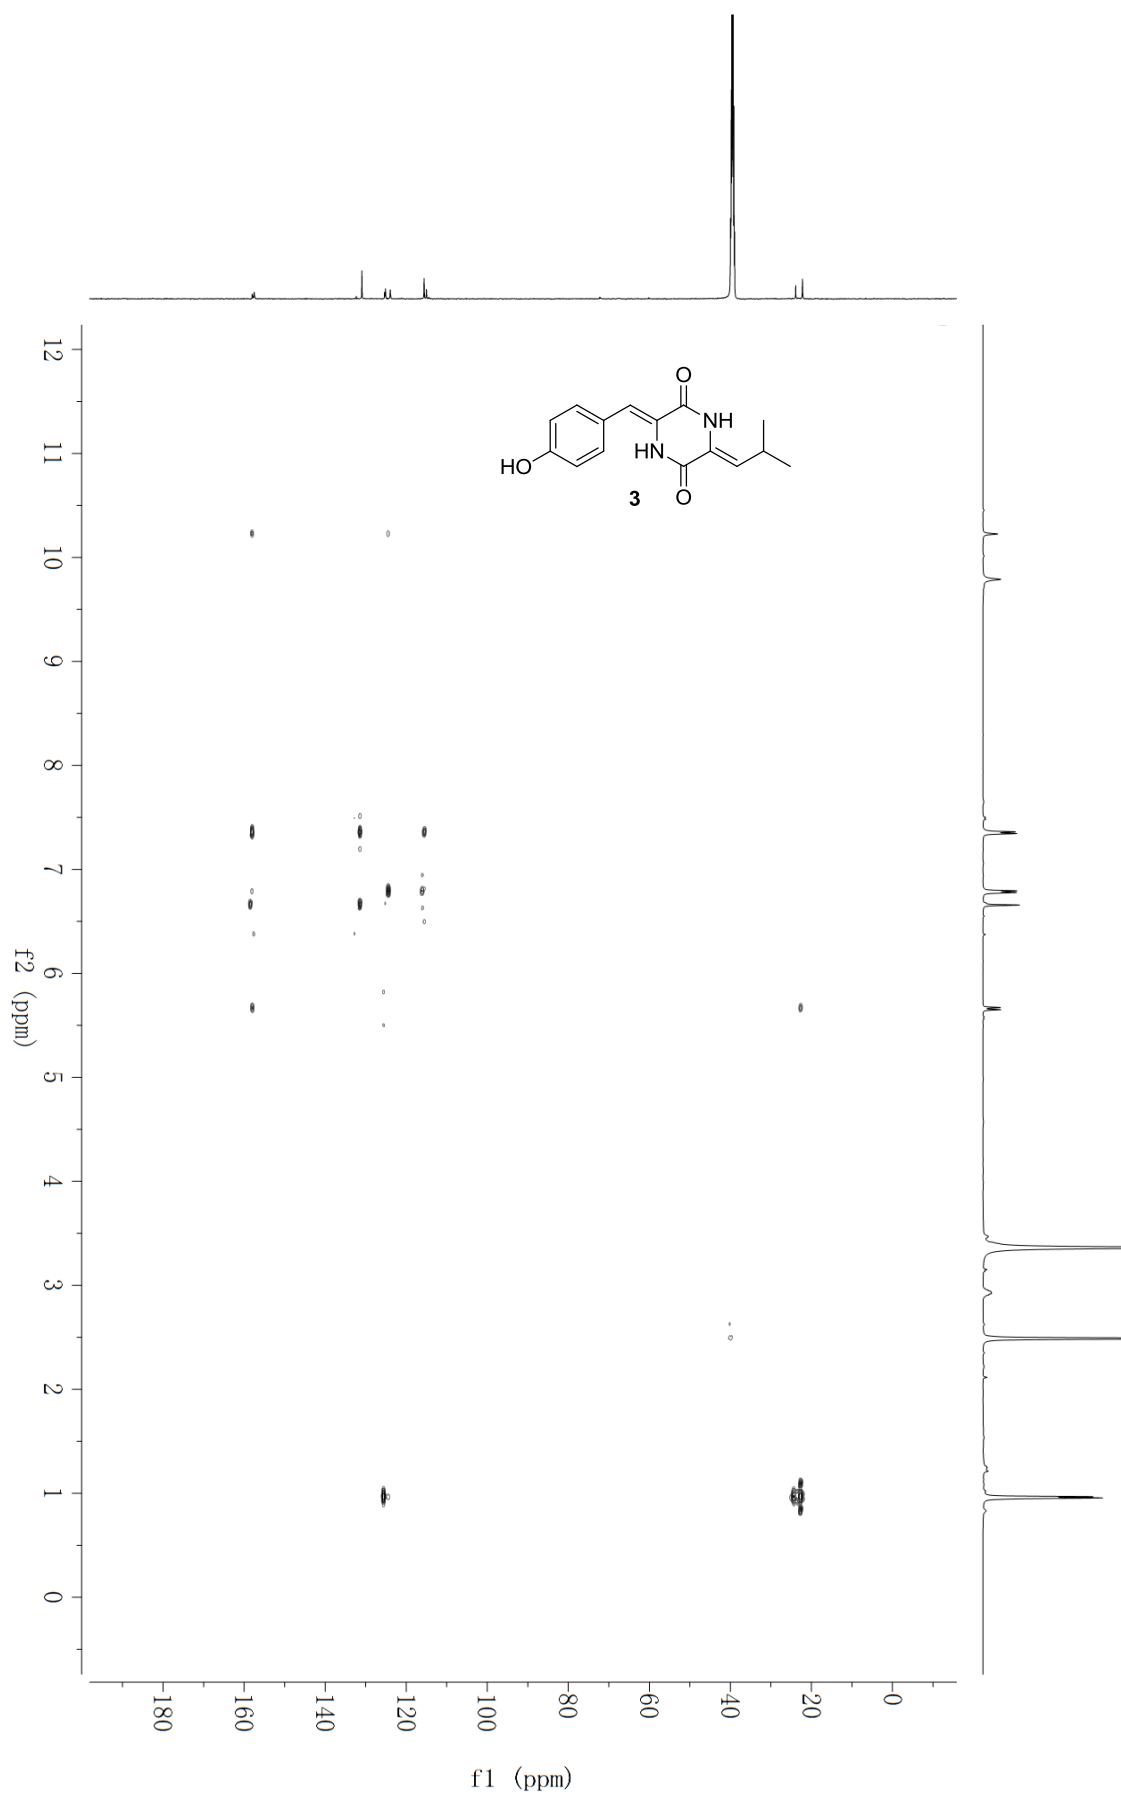

**Figure S14.** The NOESY (600 MHz, DMSO-*d*<sub>6</sub>) spectrum of compound **3**.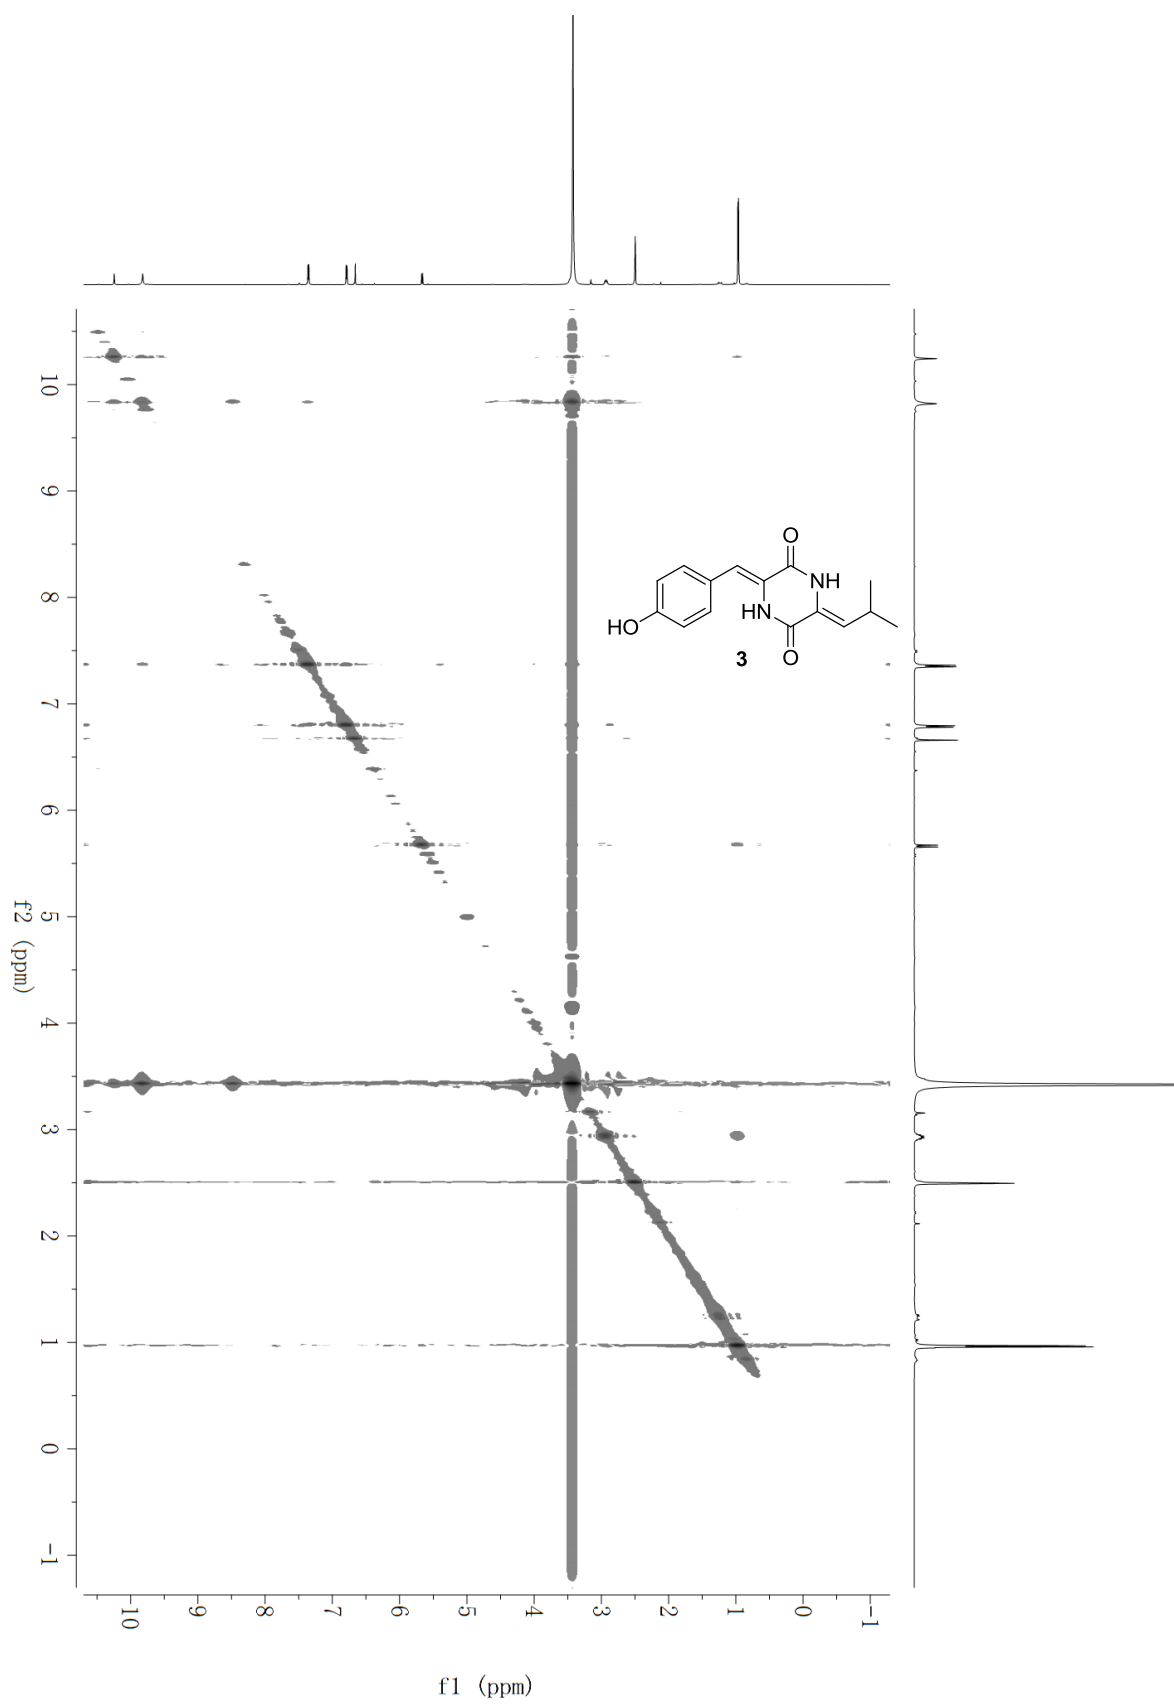

**Figure S15.** The  $^1\text{H}$  NMR (600 MHz,  $\text{DMSO-}d_6$ ) spectrum of compound **4**.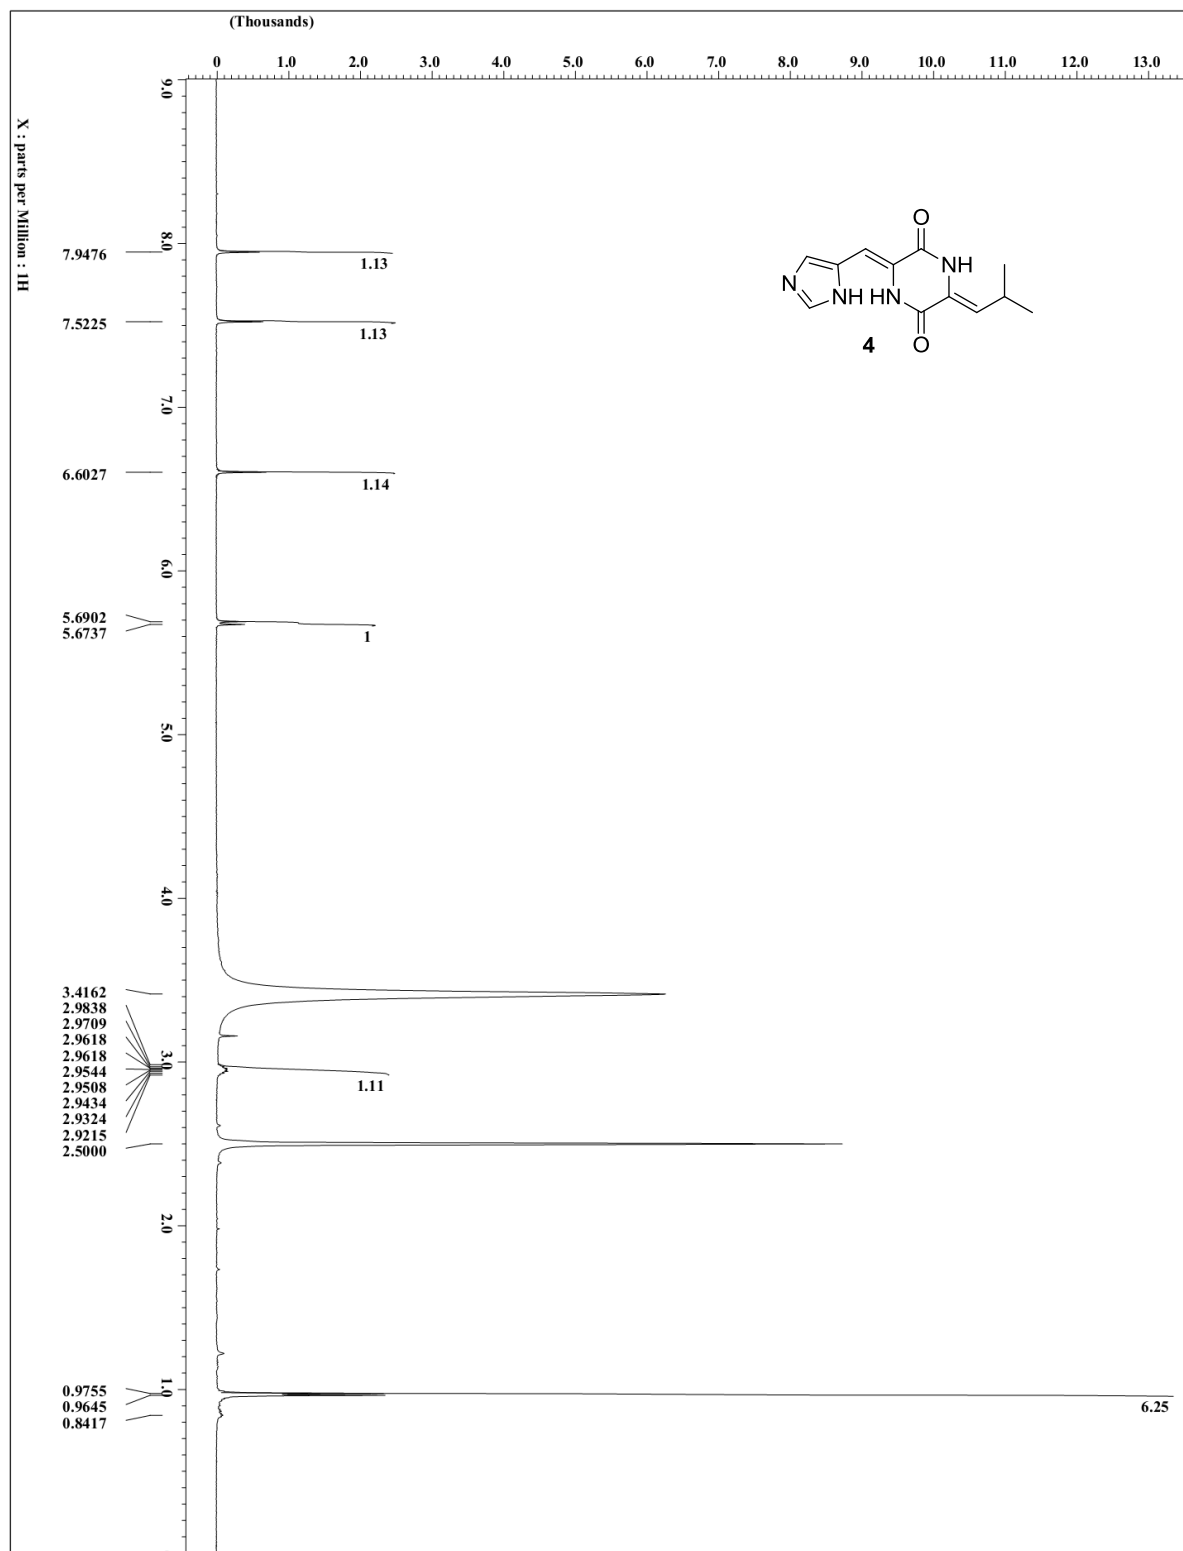

**Figure S16.** The  $^{13}\text{C}$  NMR (150 MHz,  $\text{DMSO-}d_6$ ) spectrum of compound **4**.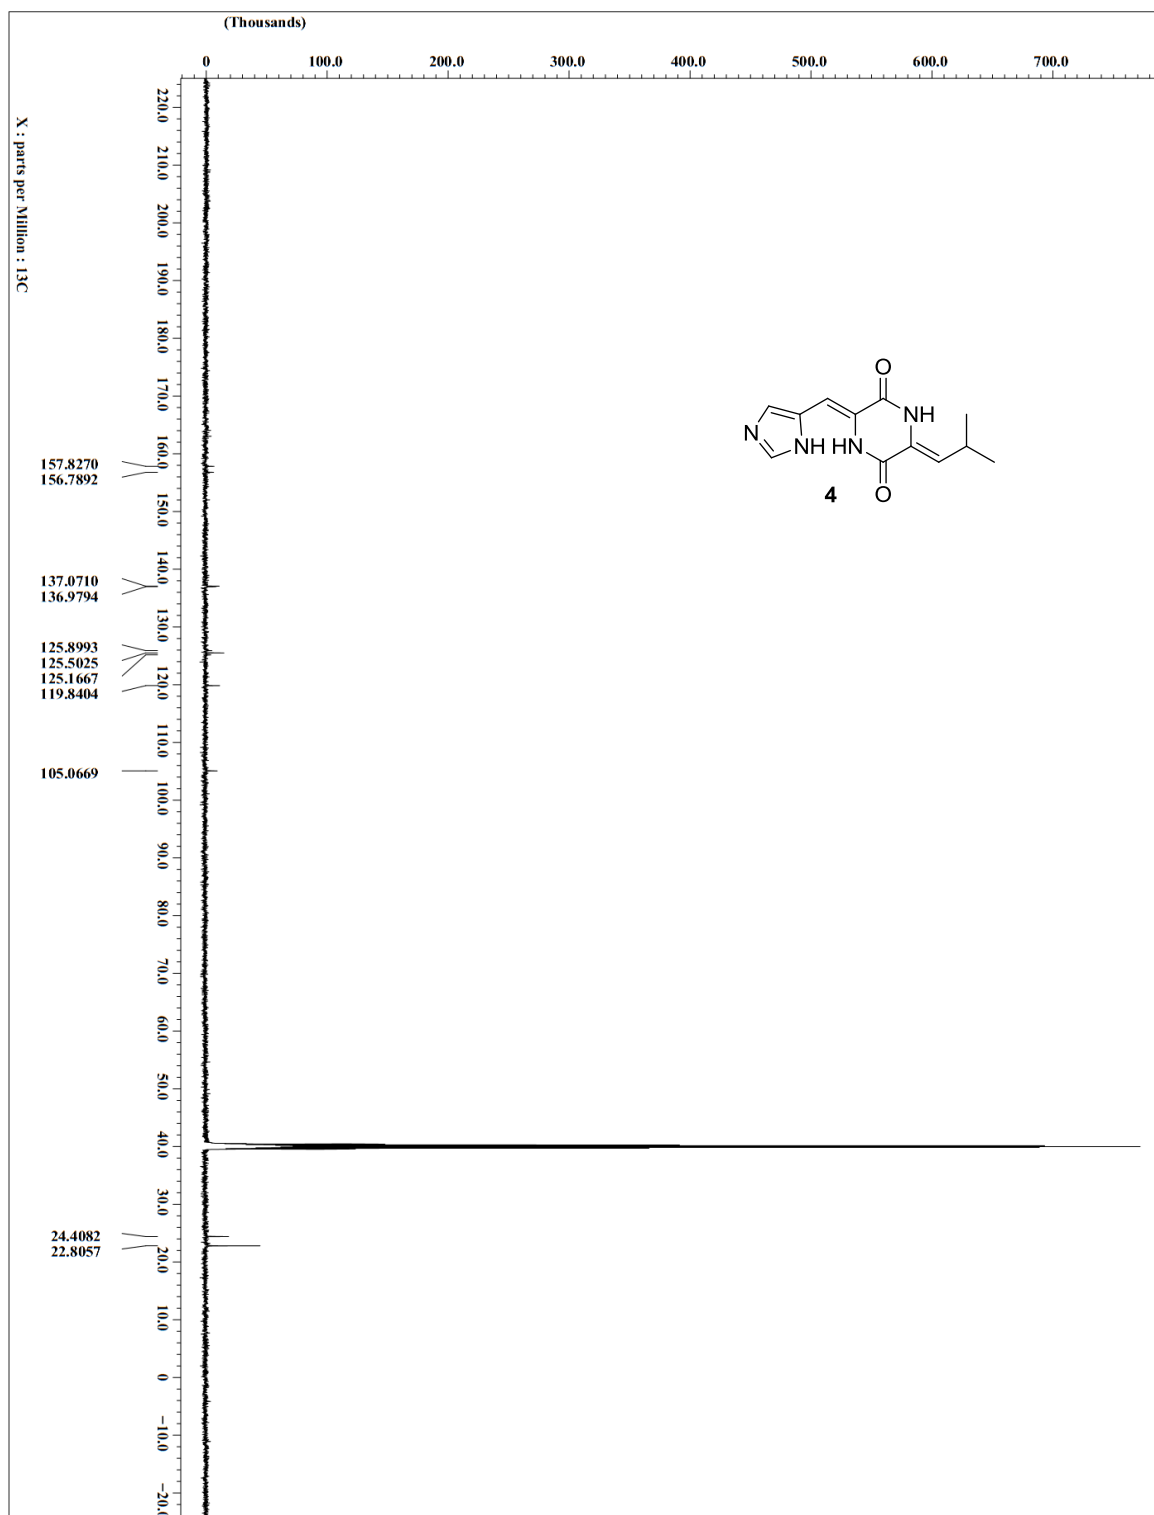

Figure S17. The DEPT (150 MHz, DMSO-*d*<sub>6</sub>) spectrum of compound 4.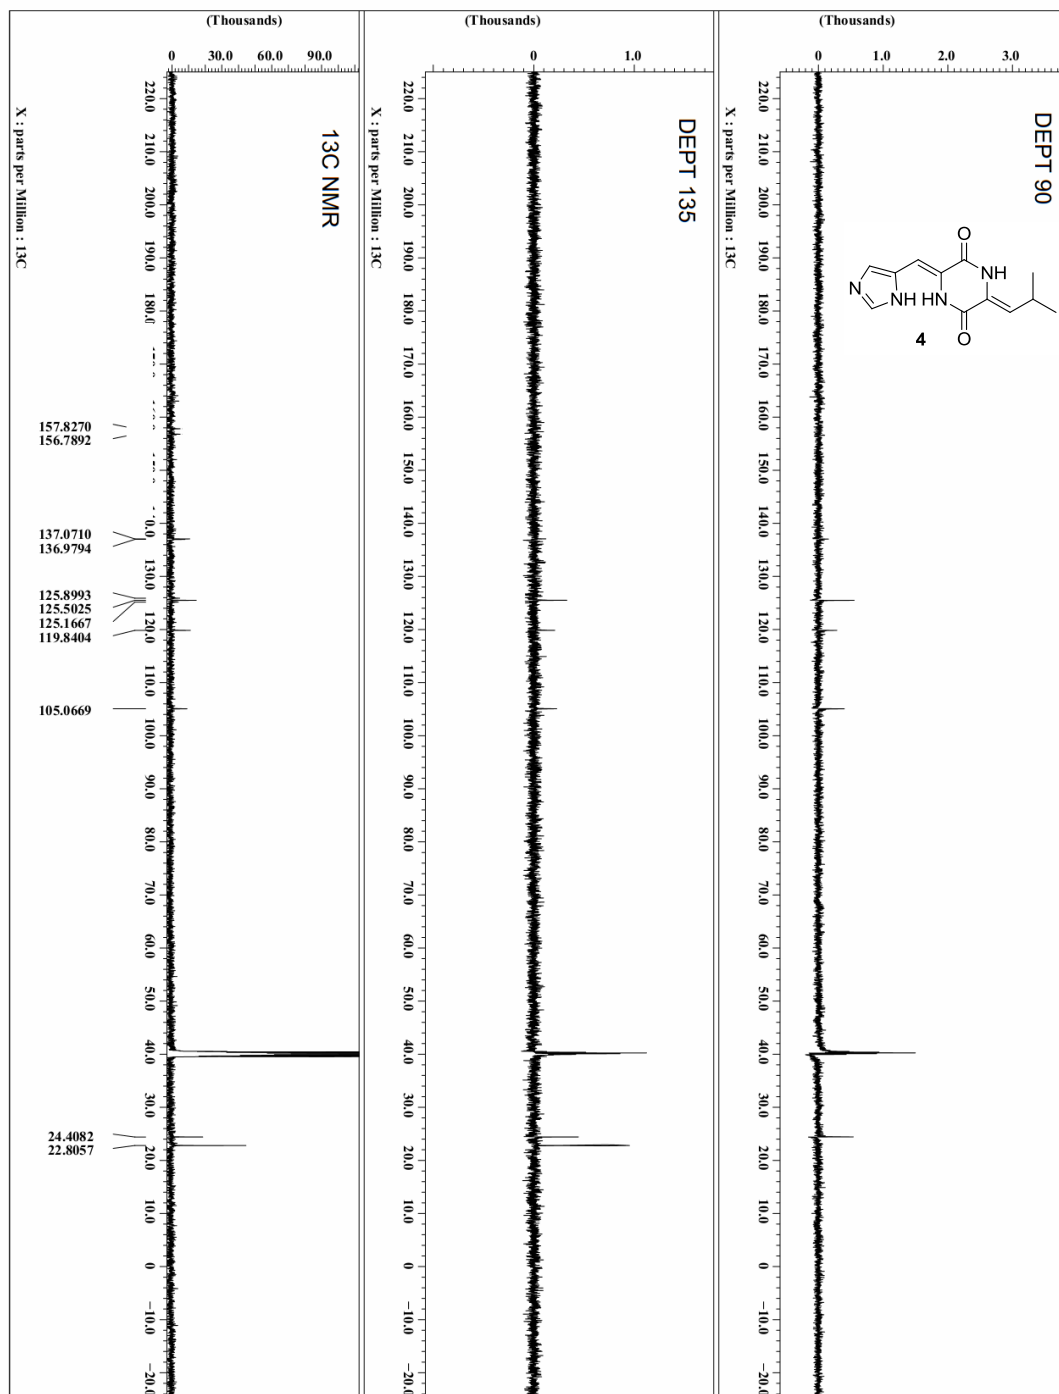

**Figure S18.** The  $^1\text{H}$ - $^1\text{H}$  COSY (600 MHz,  $\text{DMSO-}d_6$ ) spectrum of compound **4**.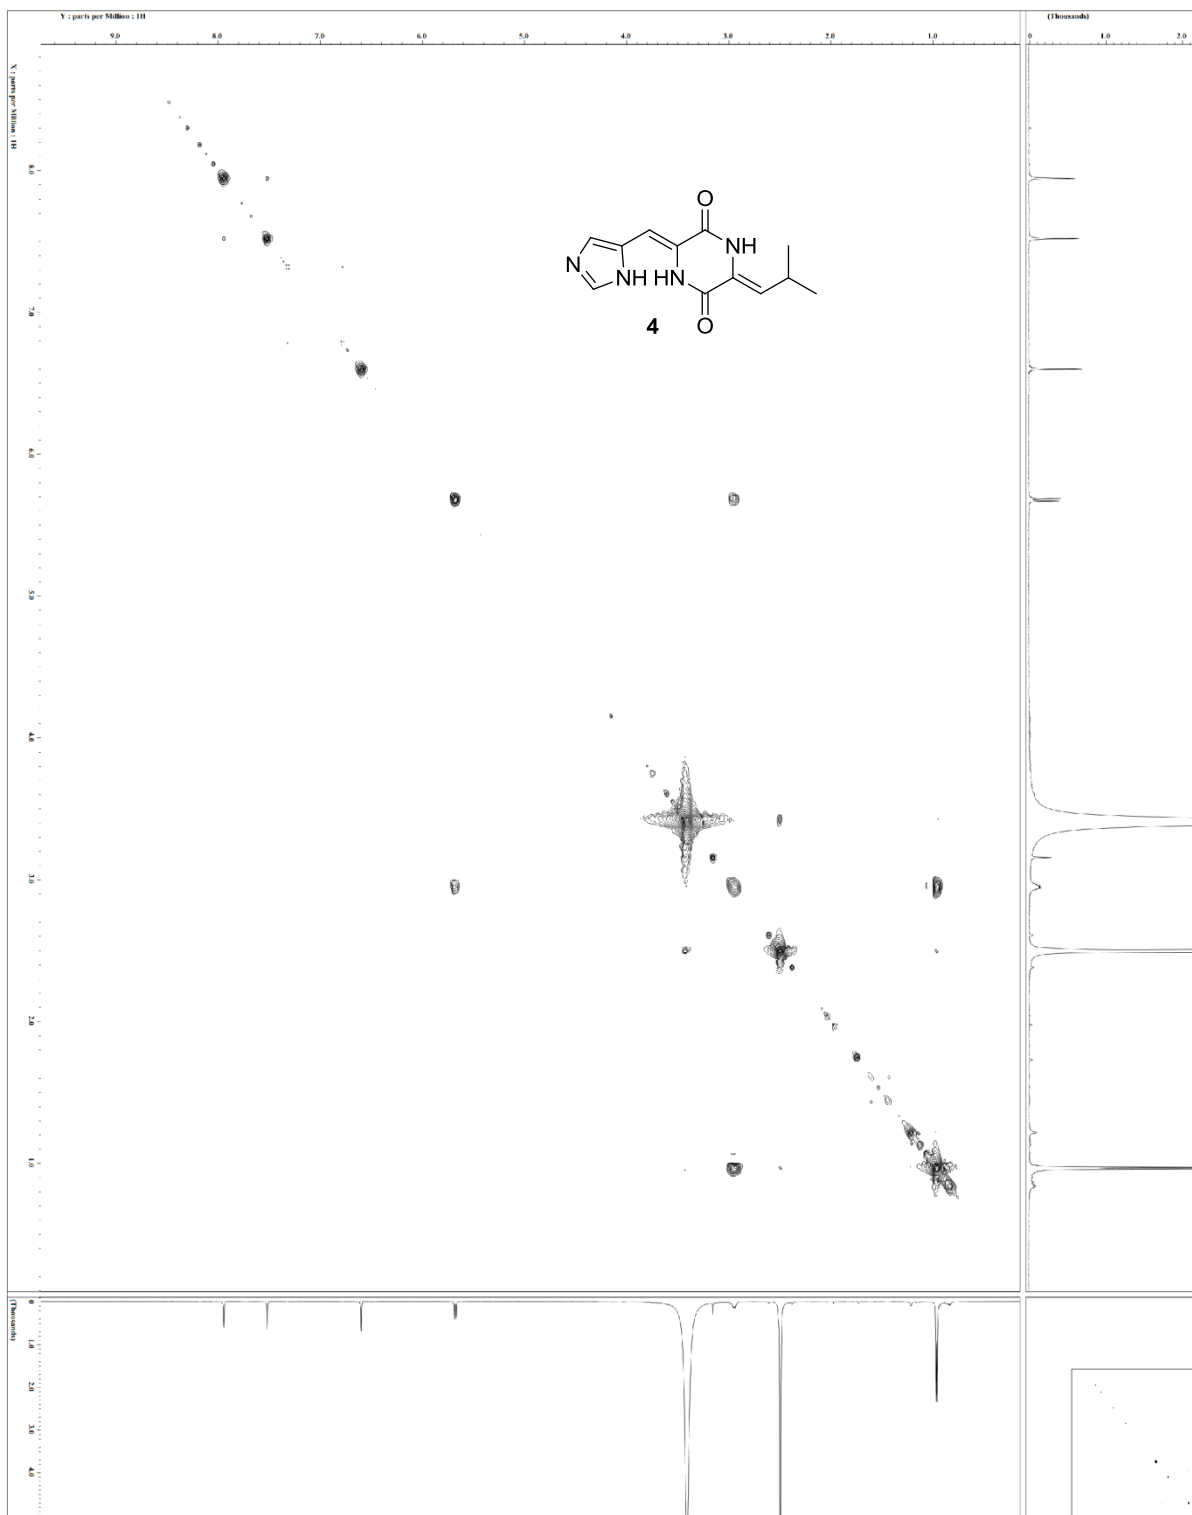

**Figure S19.** The HMQC (600 MHz, DMSO-*d*<sub>6</sub>) spectrum of compound **4**.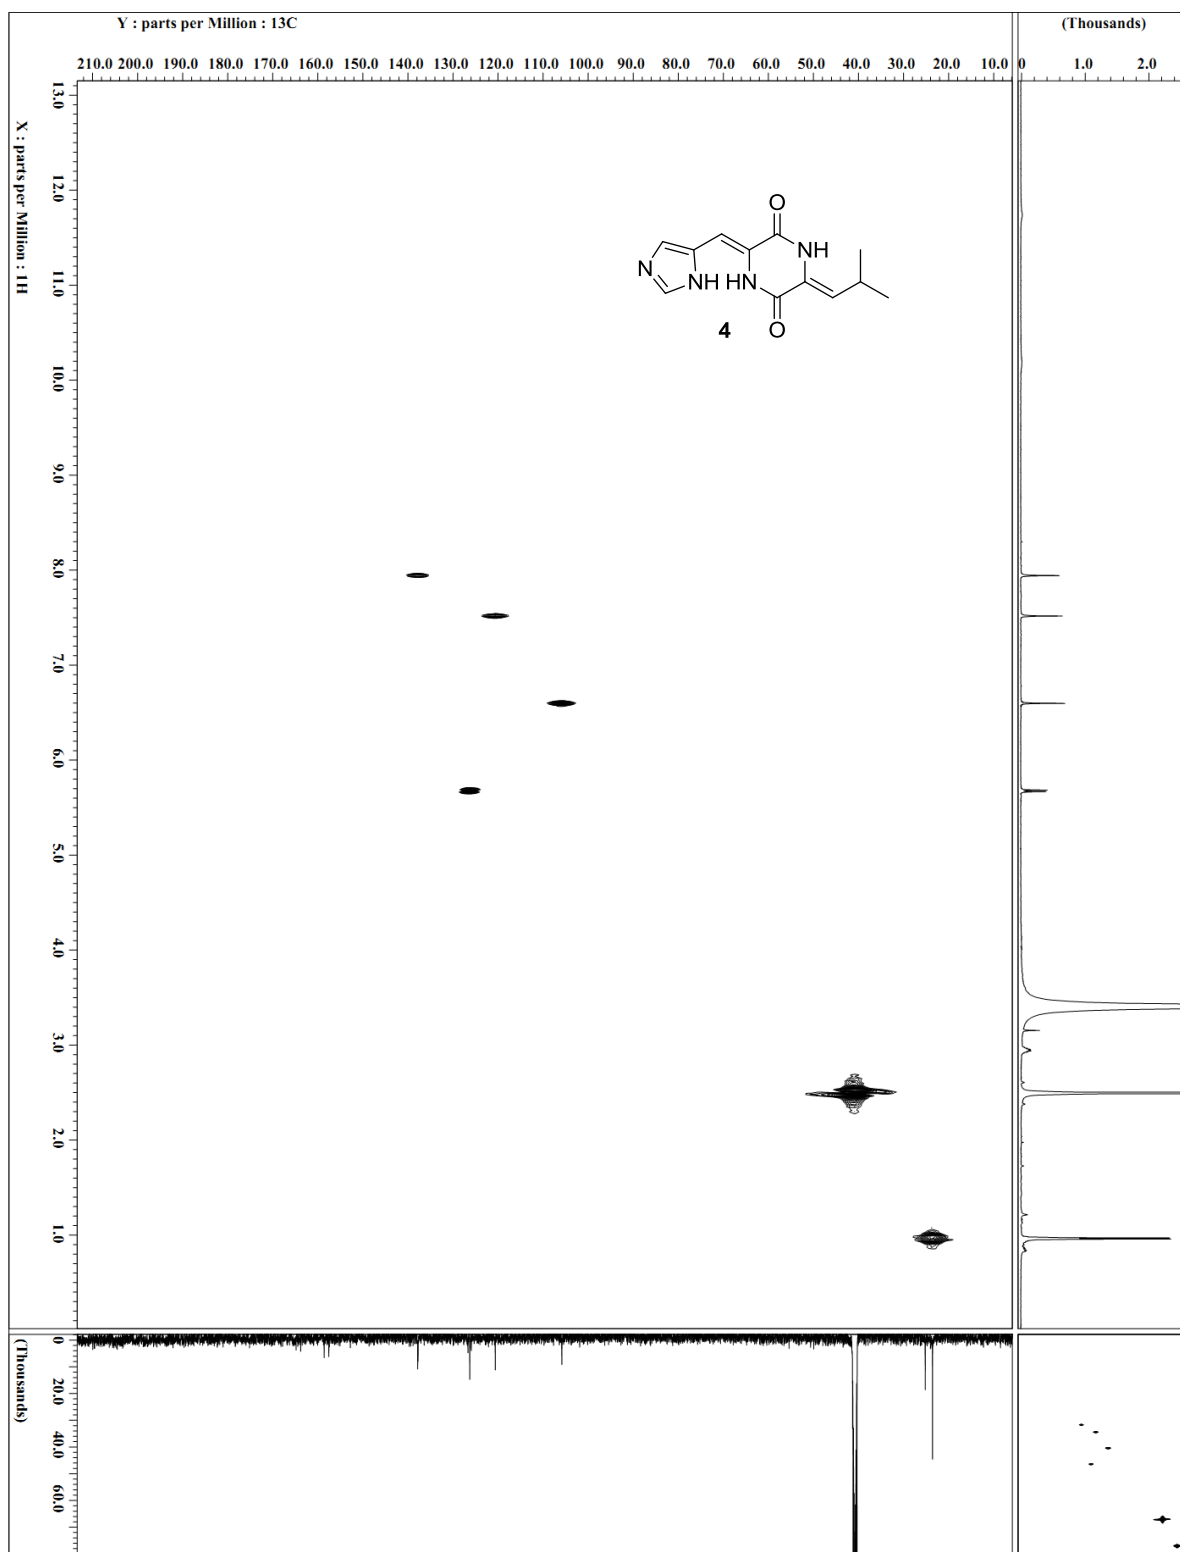

**Figure S20.** The HMBC (600 MHz, DMSO- $d_6$ ) spectrum of compound **4**.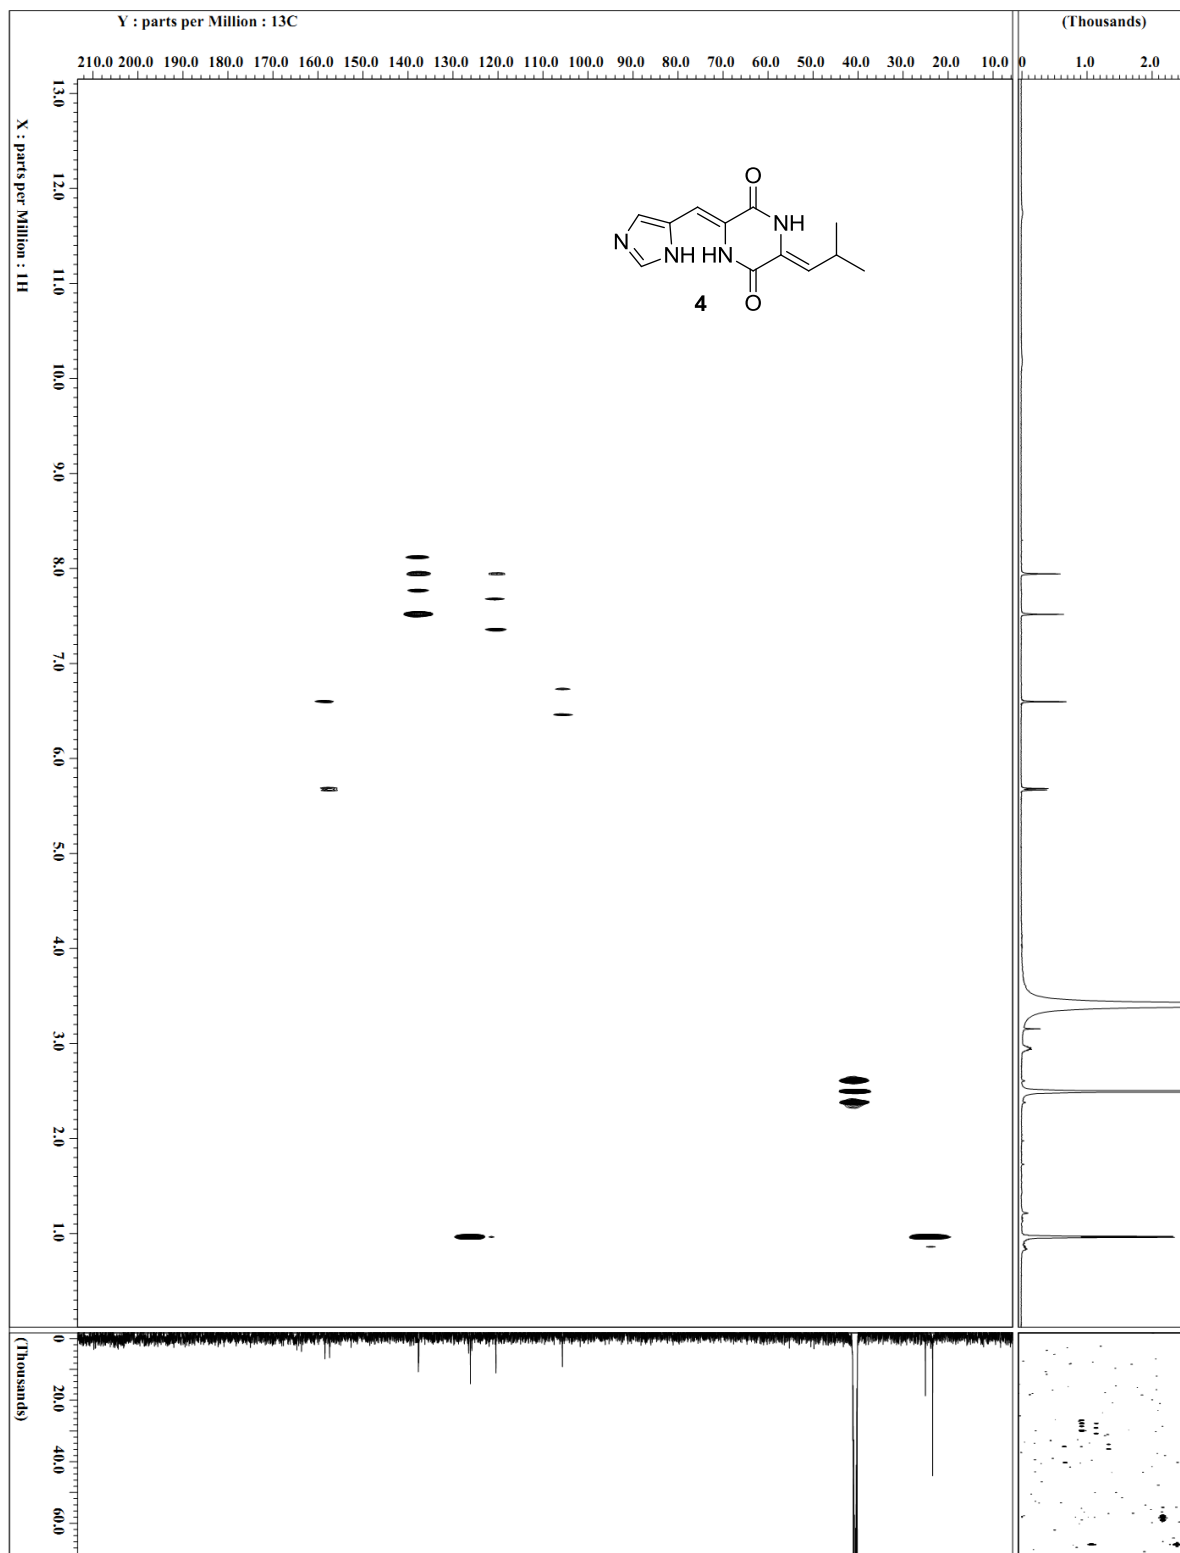



Figure S21. The  $^1\text{H}$  NMR (600 MHz,  $\text{DMSO-}d_6$ ) spectrum of compound 5.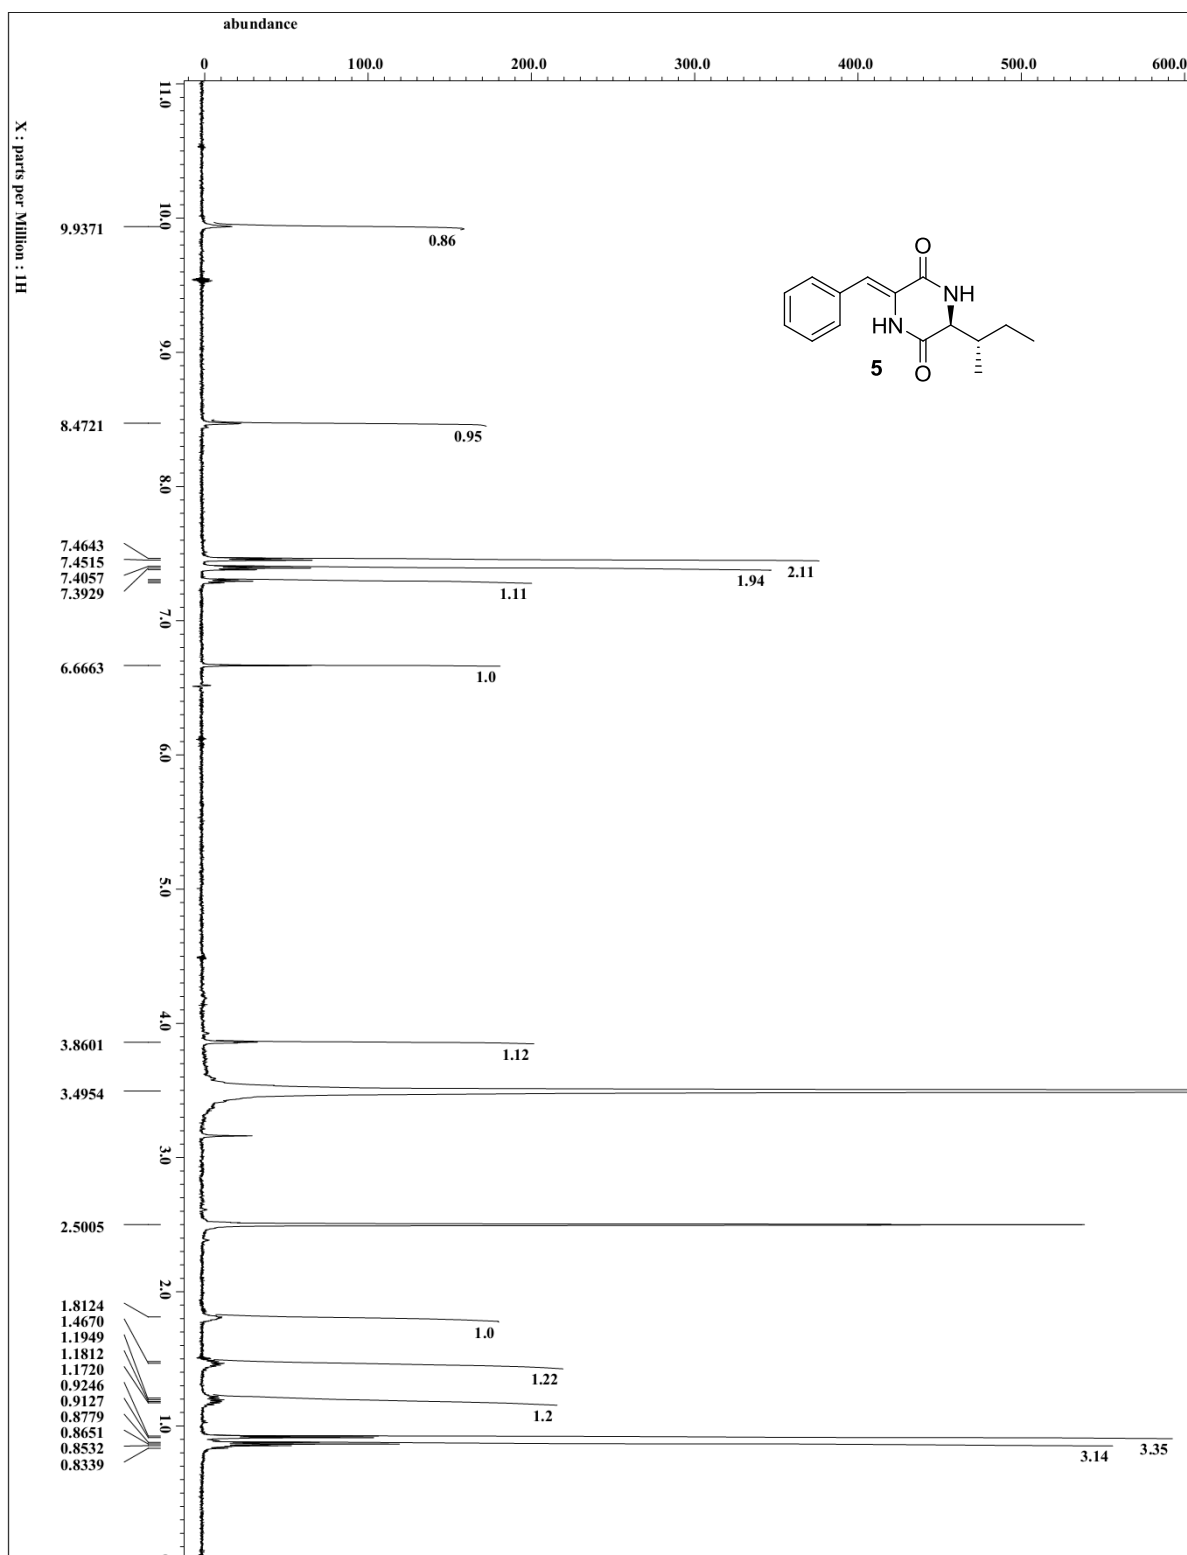



Figure S23. The DEPT (150 MHz, DMSO-*d*<sub>6</sub>) spectrum of compound 5.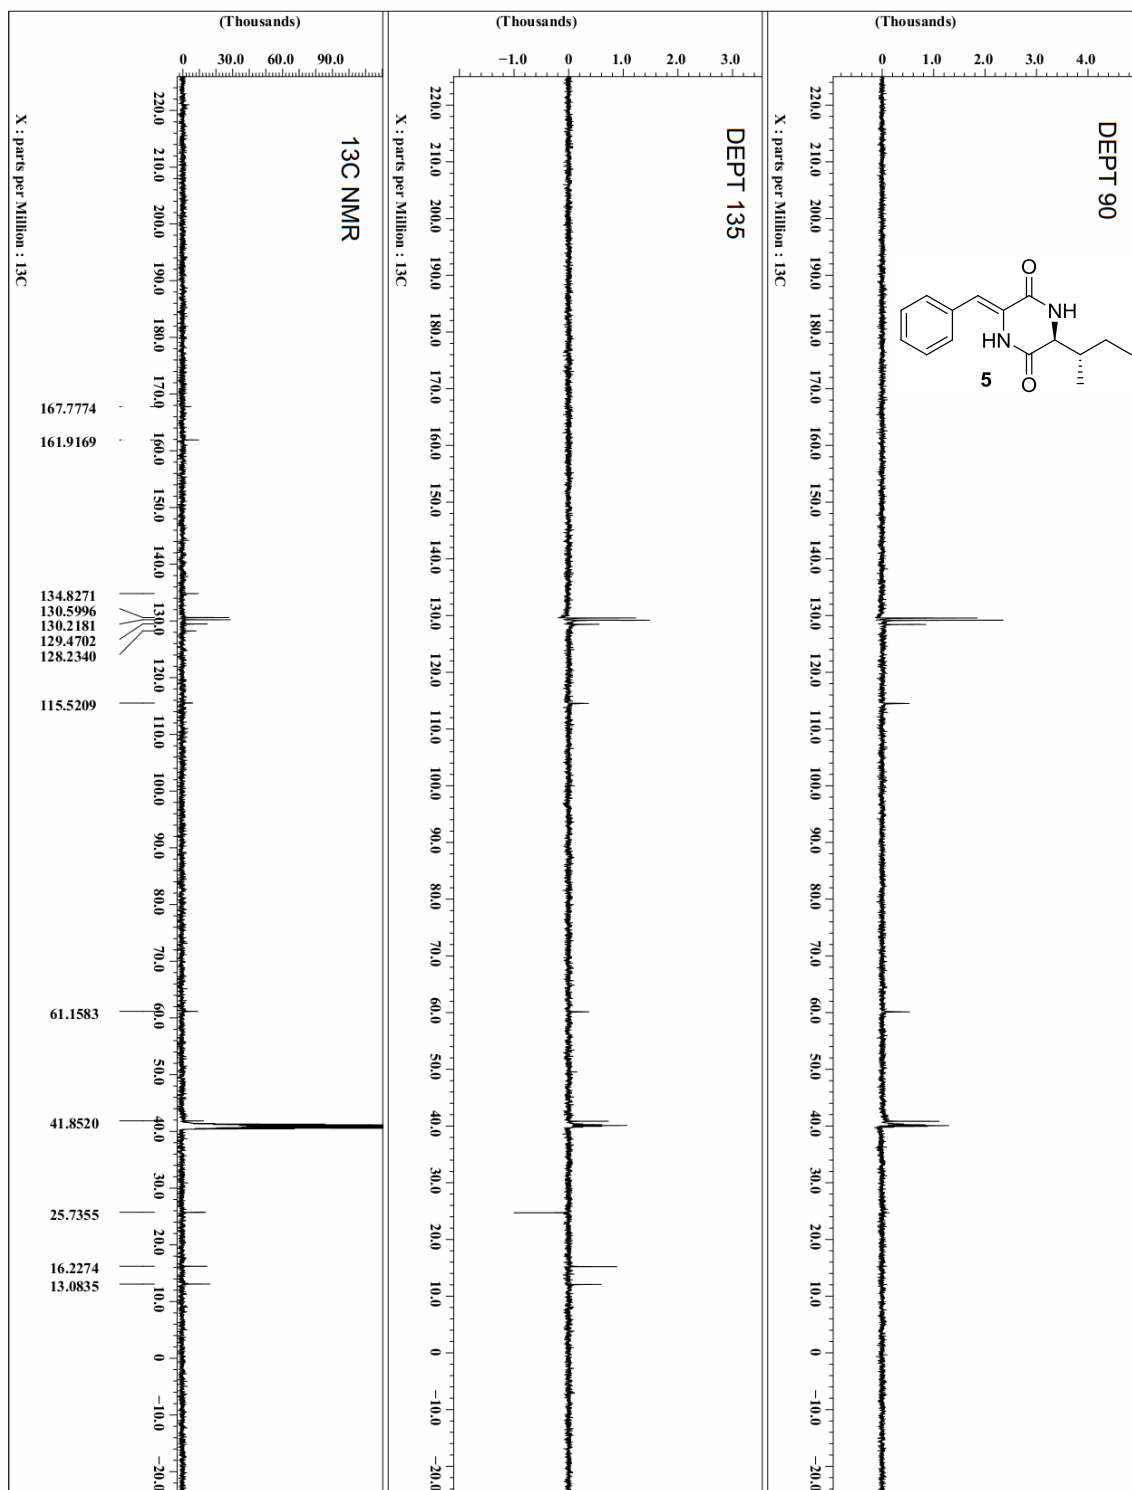

**Figure S24.** The  $^1\text{H}$ - $^1\text{H}$  COSY (600 MHz,  $\text{DMSO-}d_6$ ) spectrum of compound **5**.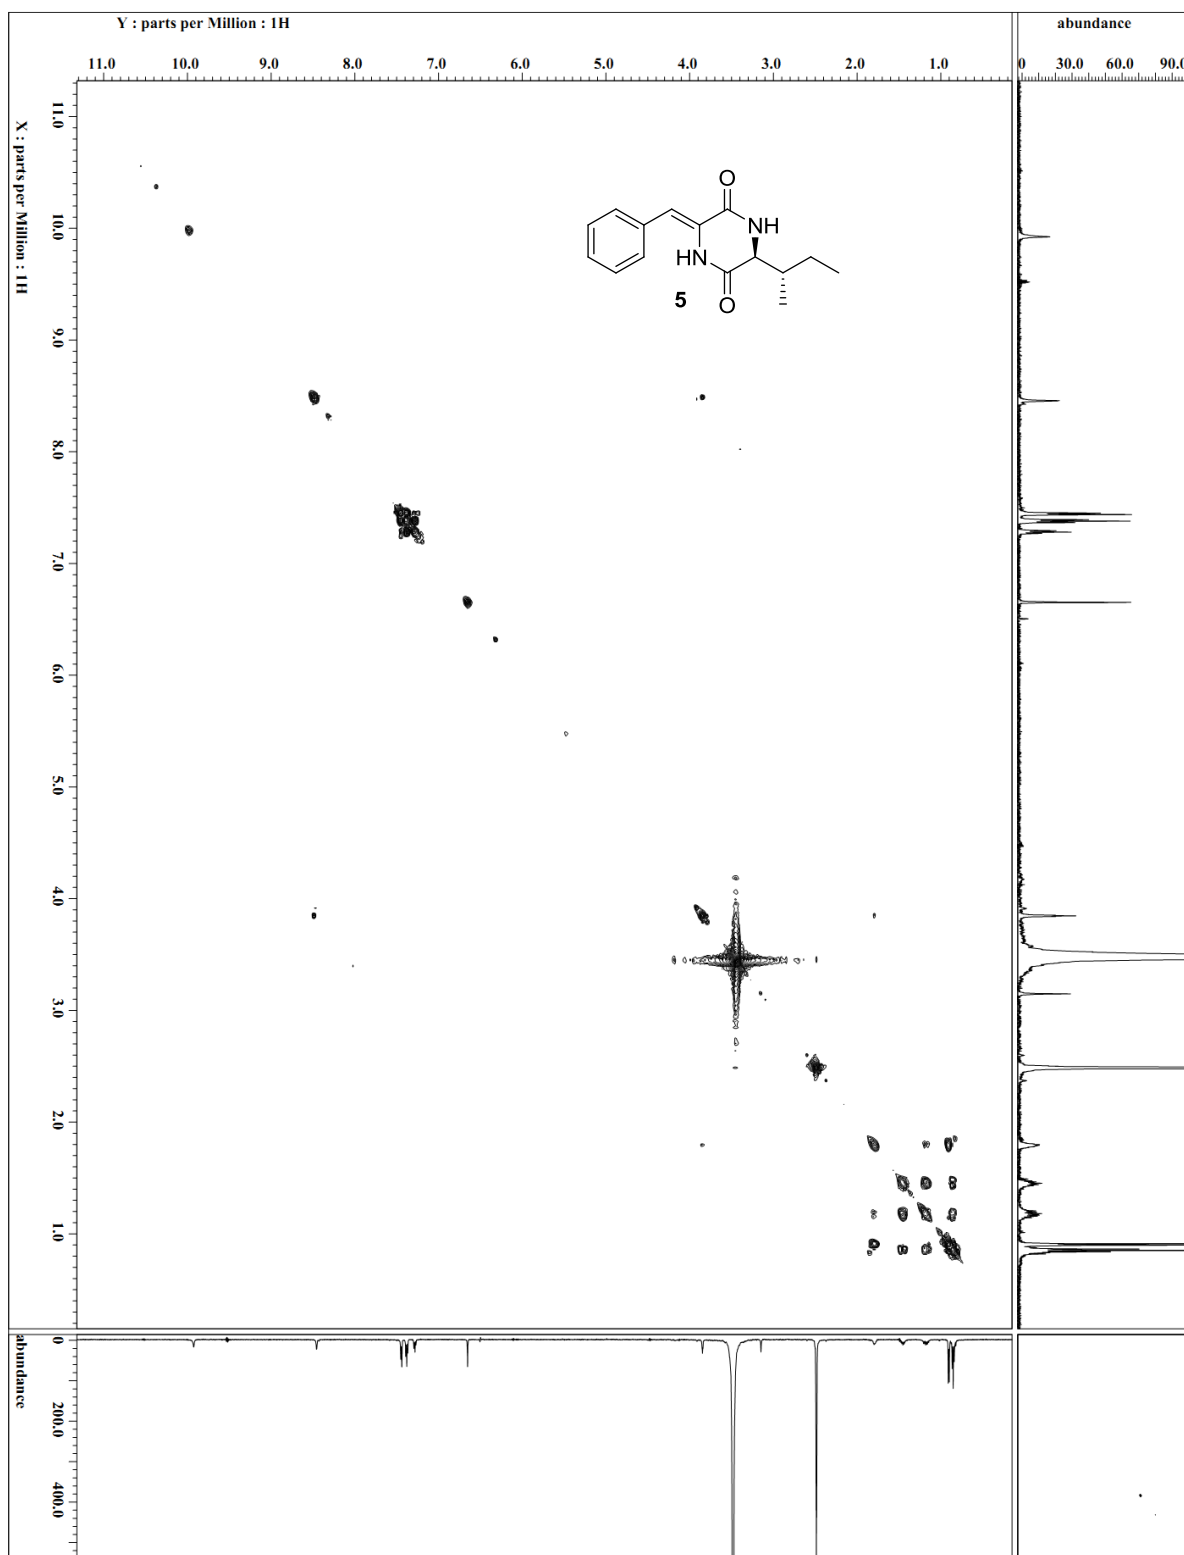

**Figure S25.** The HMQC (600 MHz, DMSO-*d*<sub>6</sub>) spectrum of compound **5**.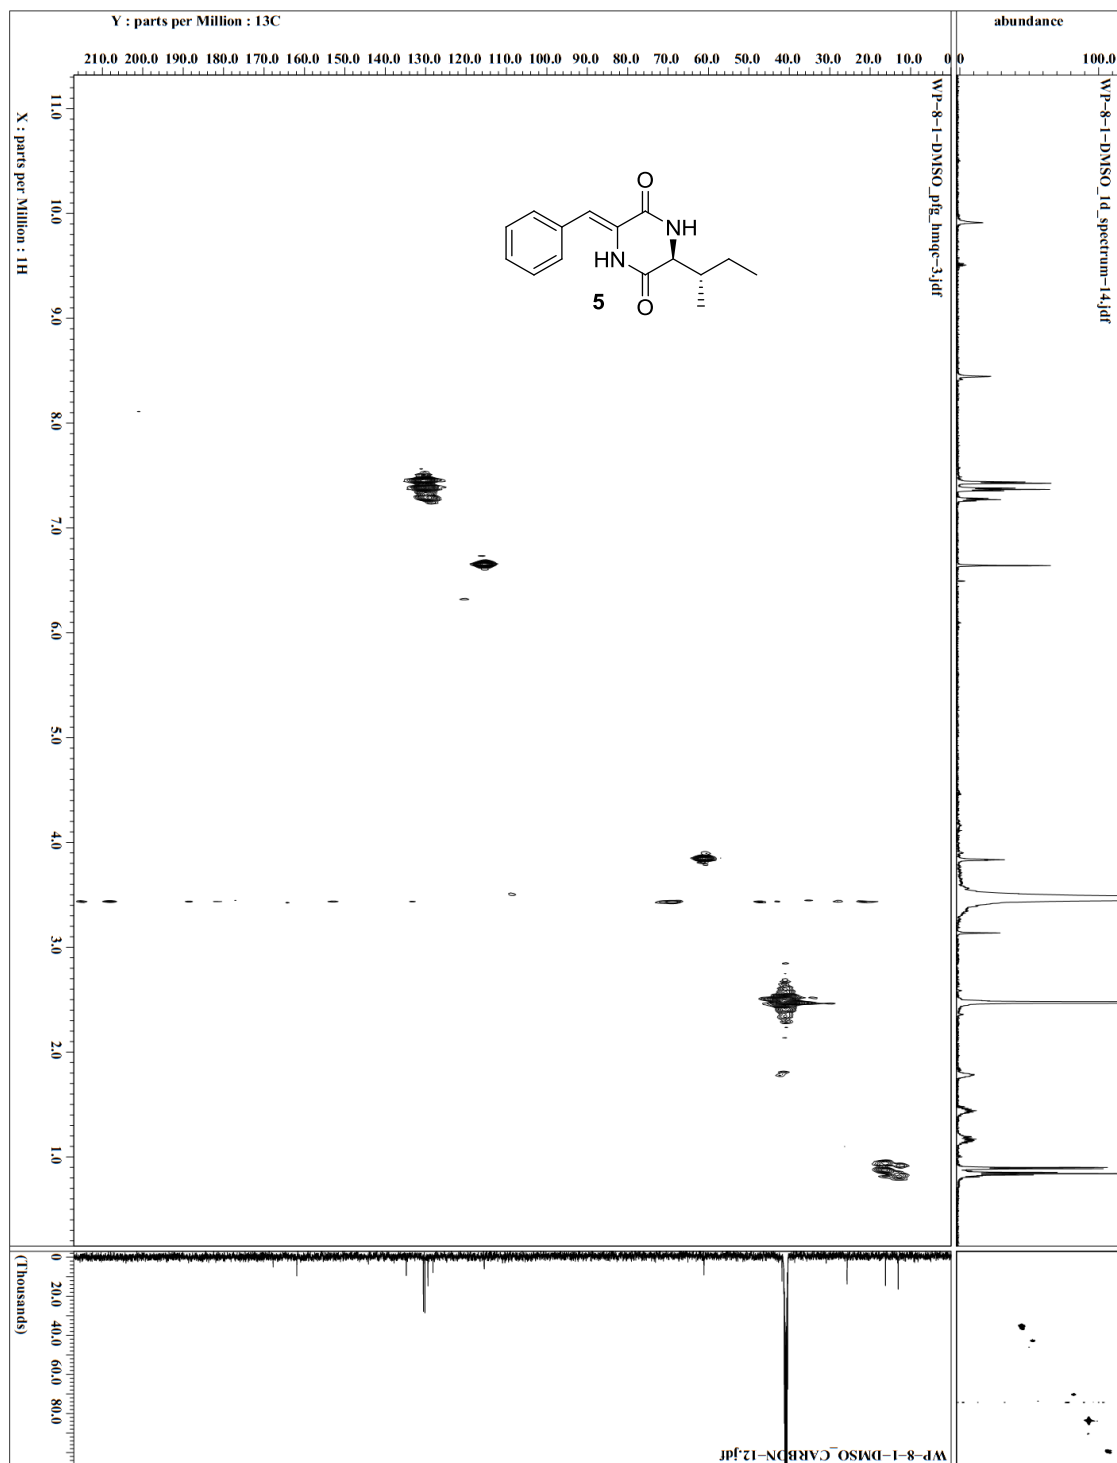

**Figure S26.** The HMBC (600 MHz, DMSO-*d*<sub>6</sub>) spectrum of compound **5**.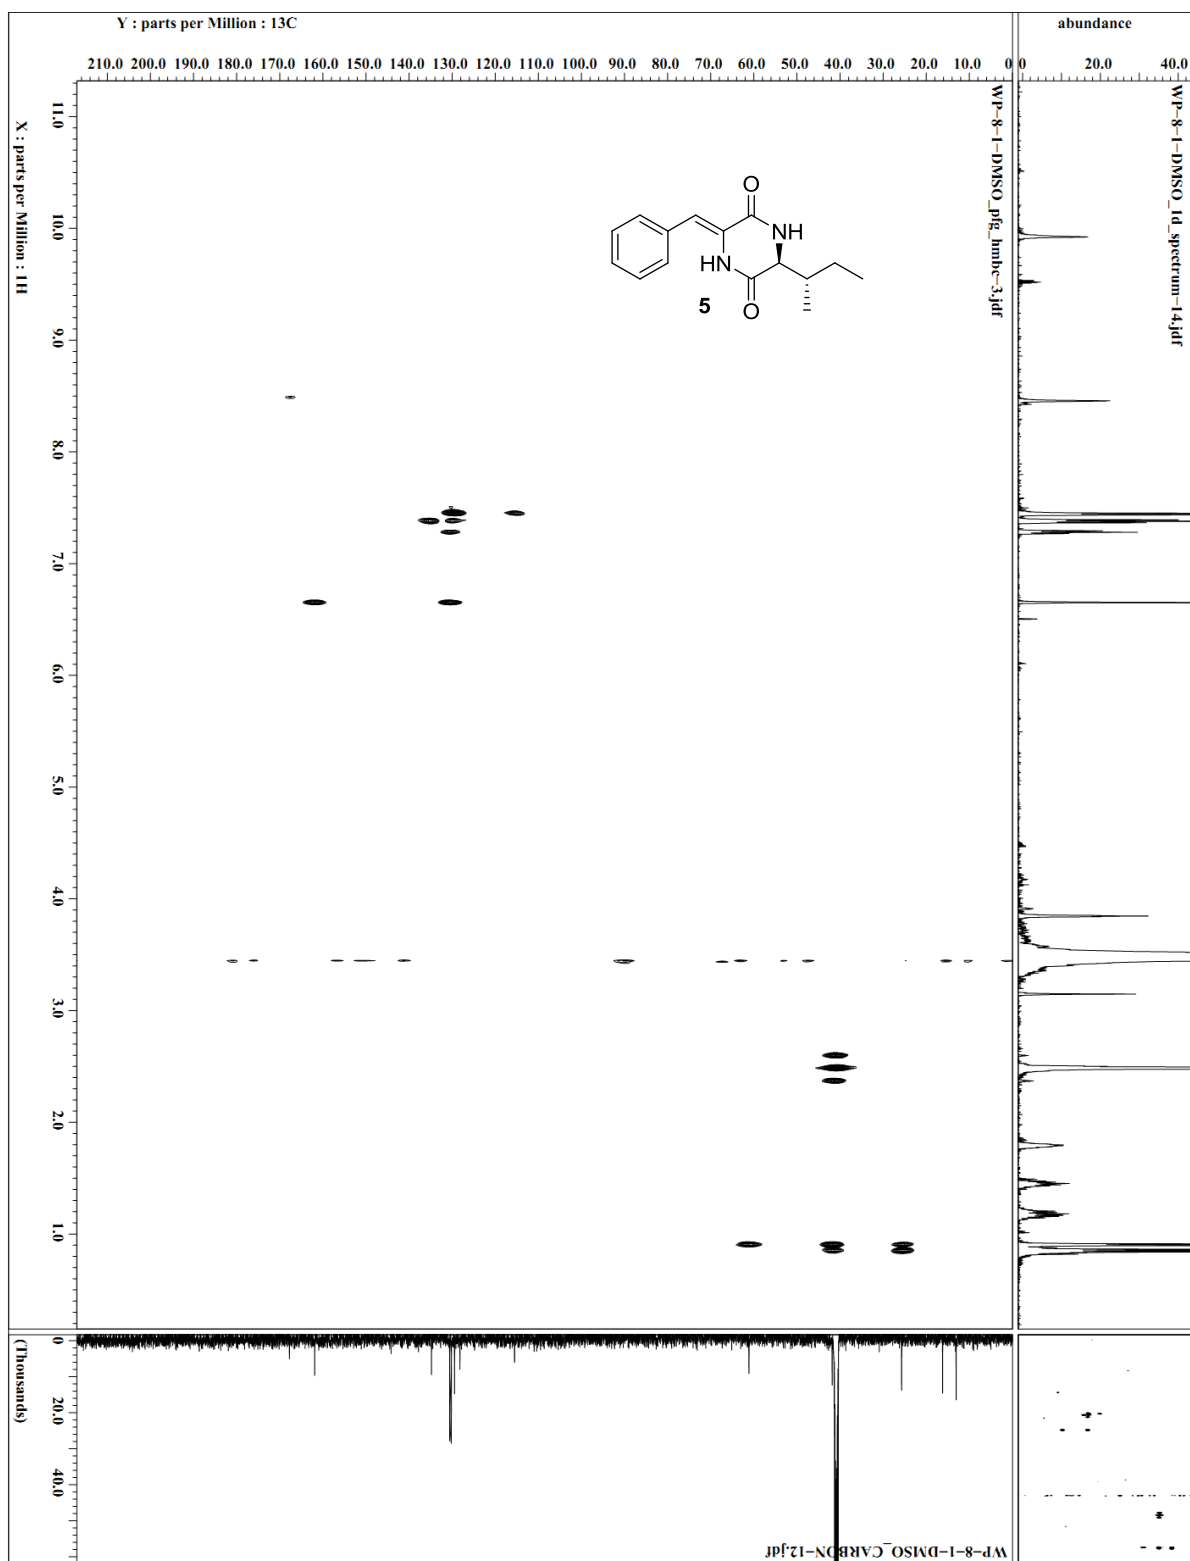

**Figure S27.** The NOESY (600 MHz, DMSO- $d_6$ ) spectrum of compound **5**.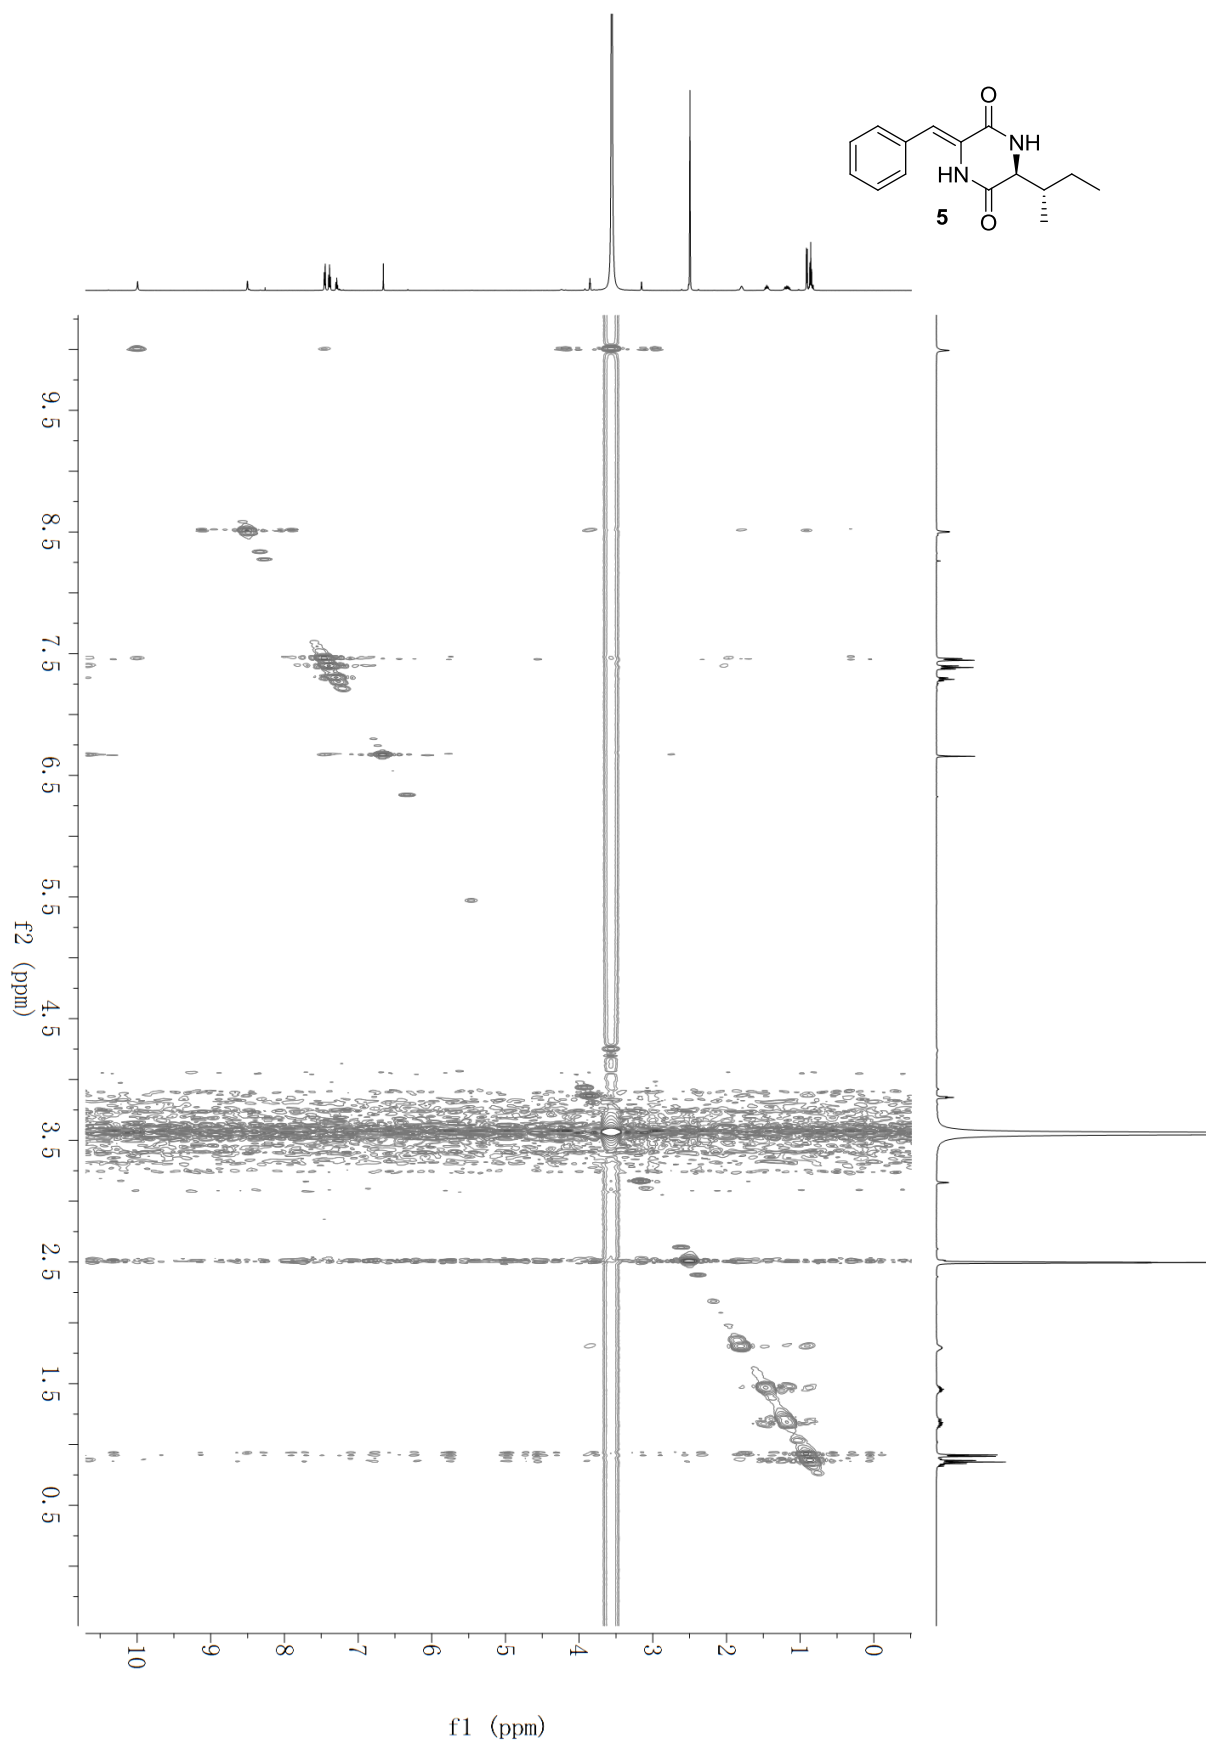

**Figure S28.** The  $^1\text{H}$  NMR (600 MHz,  $\text{DMSO-}d_6$ ) spectrum of compound **6**.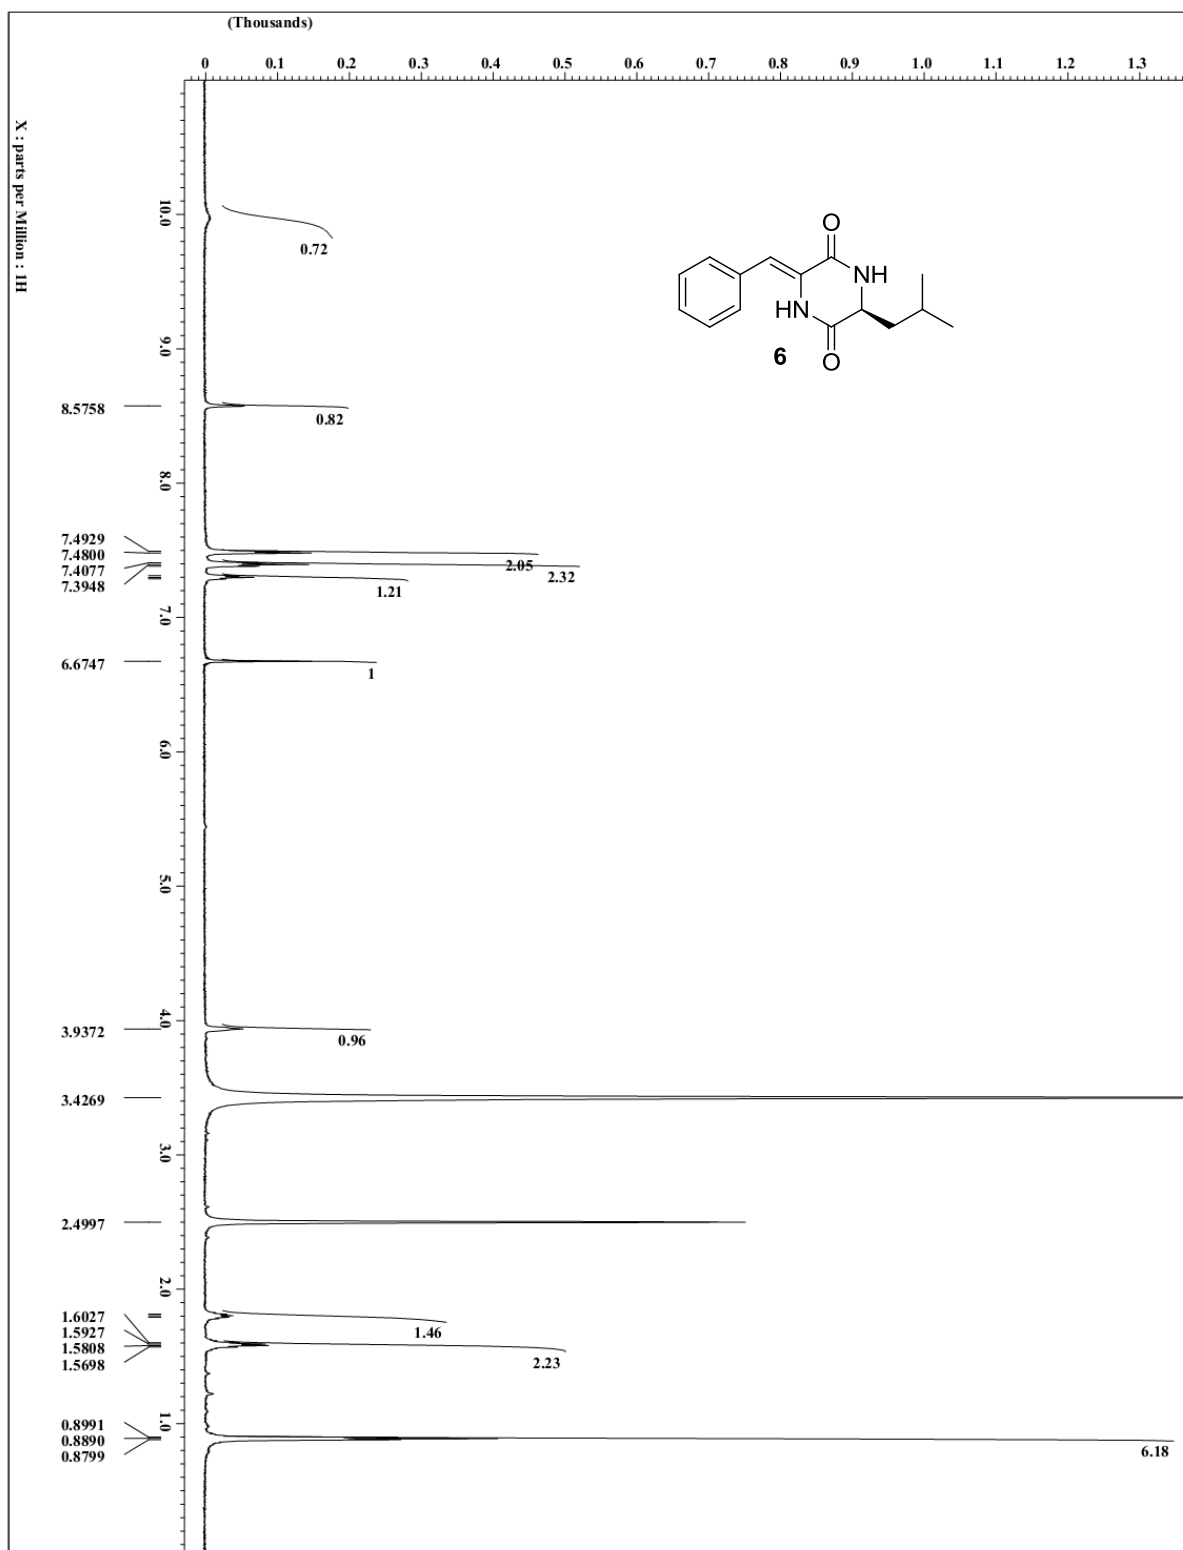



**Figure S29.** The  $^{13}\text{C}$  NMR (150 MHz,  $\text{DMSO-}d_6$ ) spectrum of compound **6** in  $\text{DMSO-}d_6$ .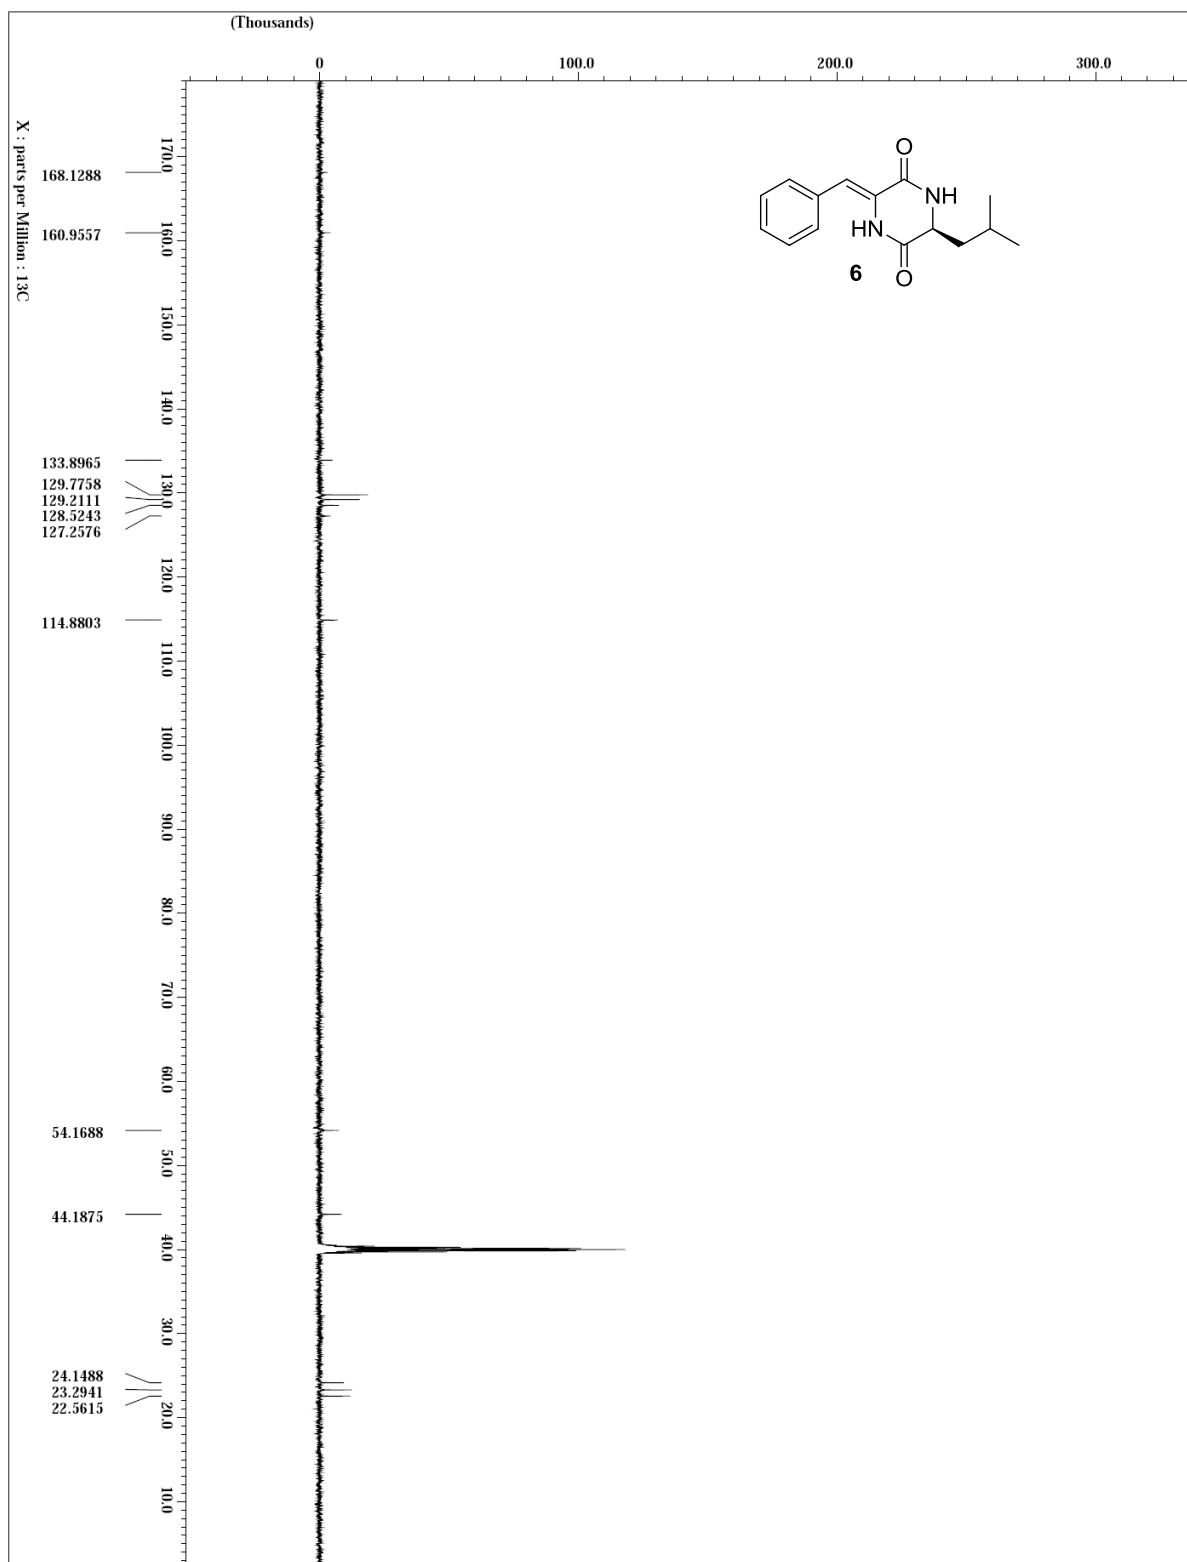

Figure S30. The DEPT (150 MHz, DMSO-*d*<sub>6</sub>) spectrum of compound 6.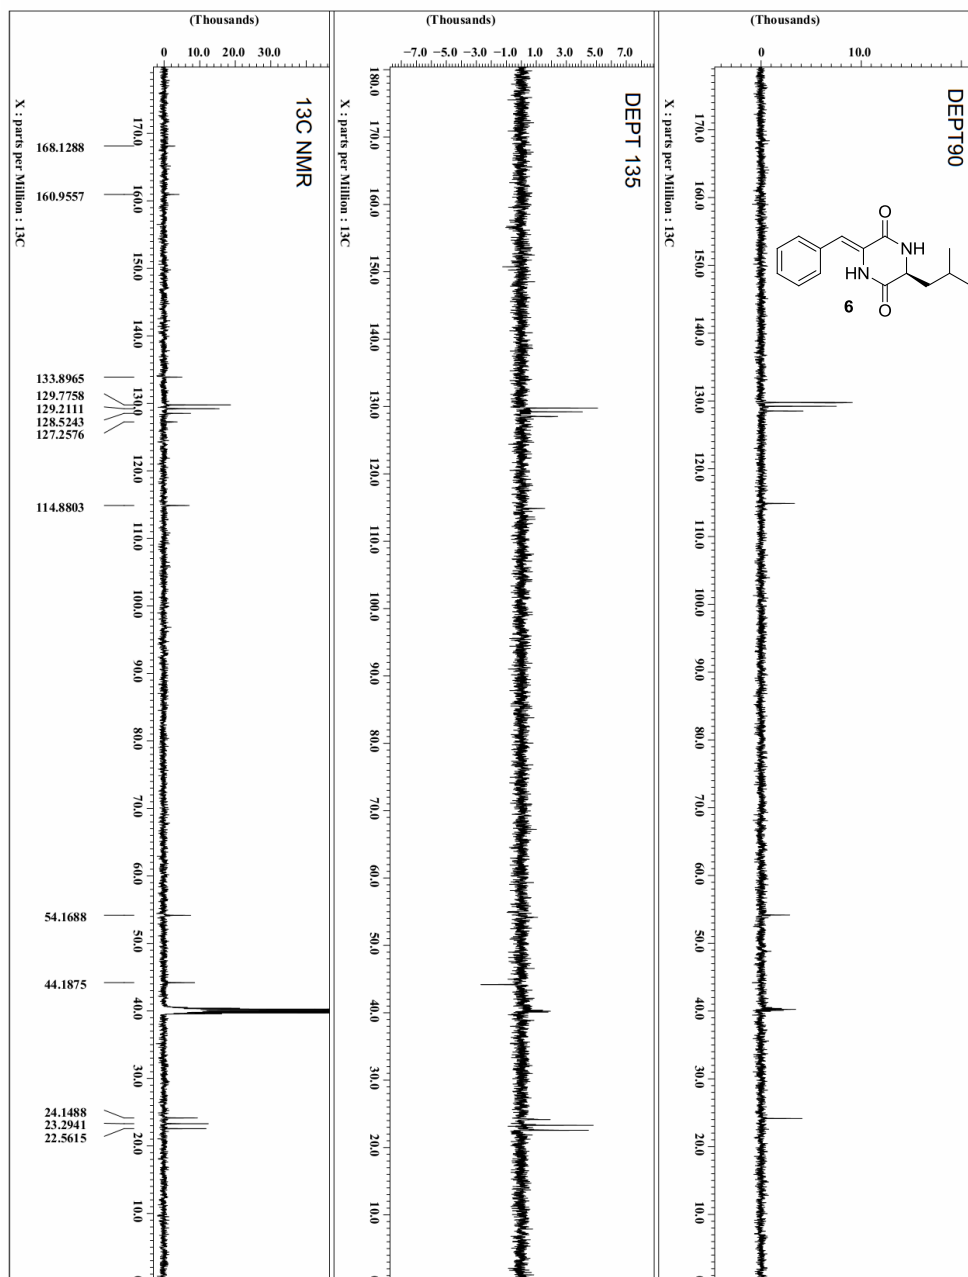

Figure S31. The <sup>1</sup>H NMR (600 MHz, DMSO-d<sub>6</sub>) spectrum of (S)-1 MTPA ester (1a).

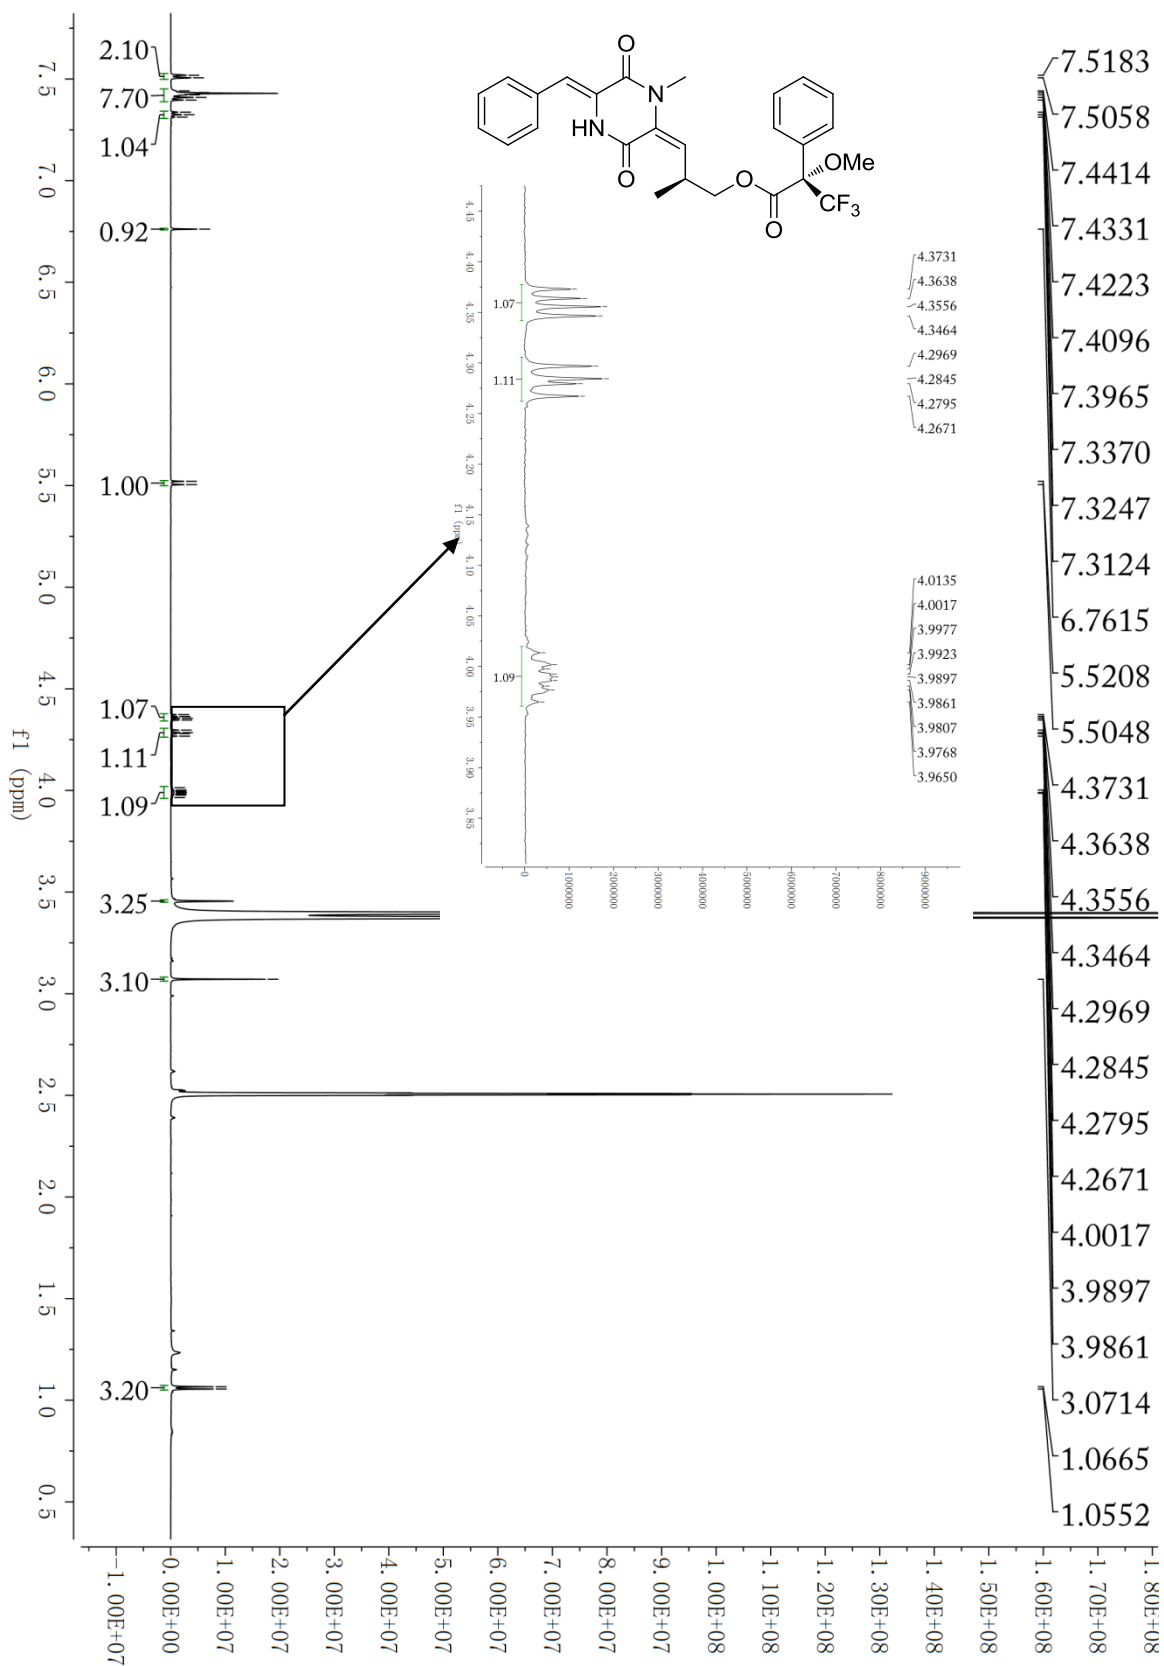

**Figure S32.** The  $^1\text{H}$  NMR (600 MHz,  $\text{DMSO-}d_6$ ) spectrum of (*R*)-1 MTPA ester (**1b**) in  $\text{DMSO-}d_6$ .

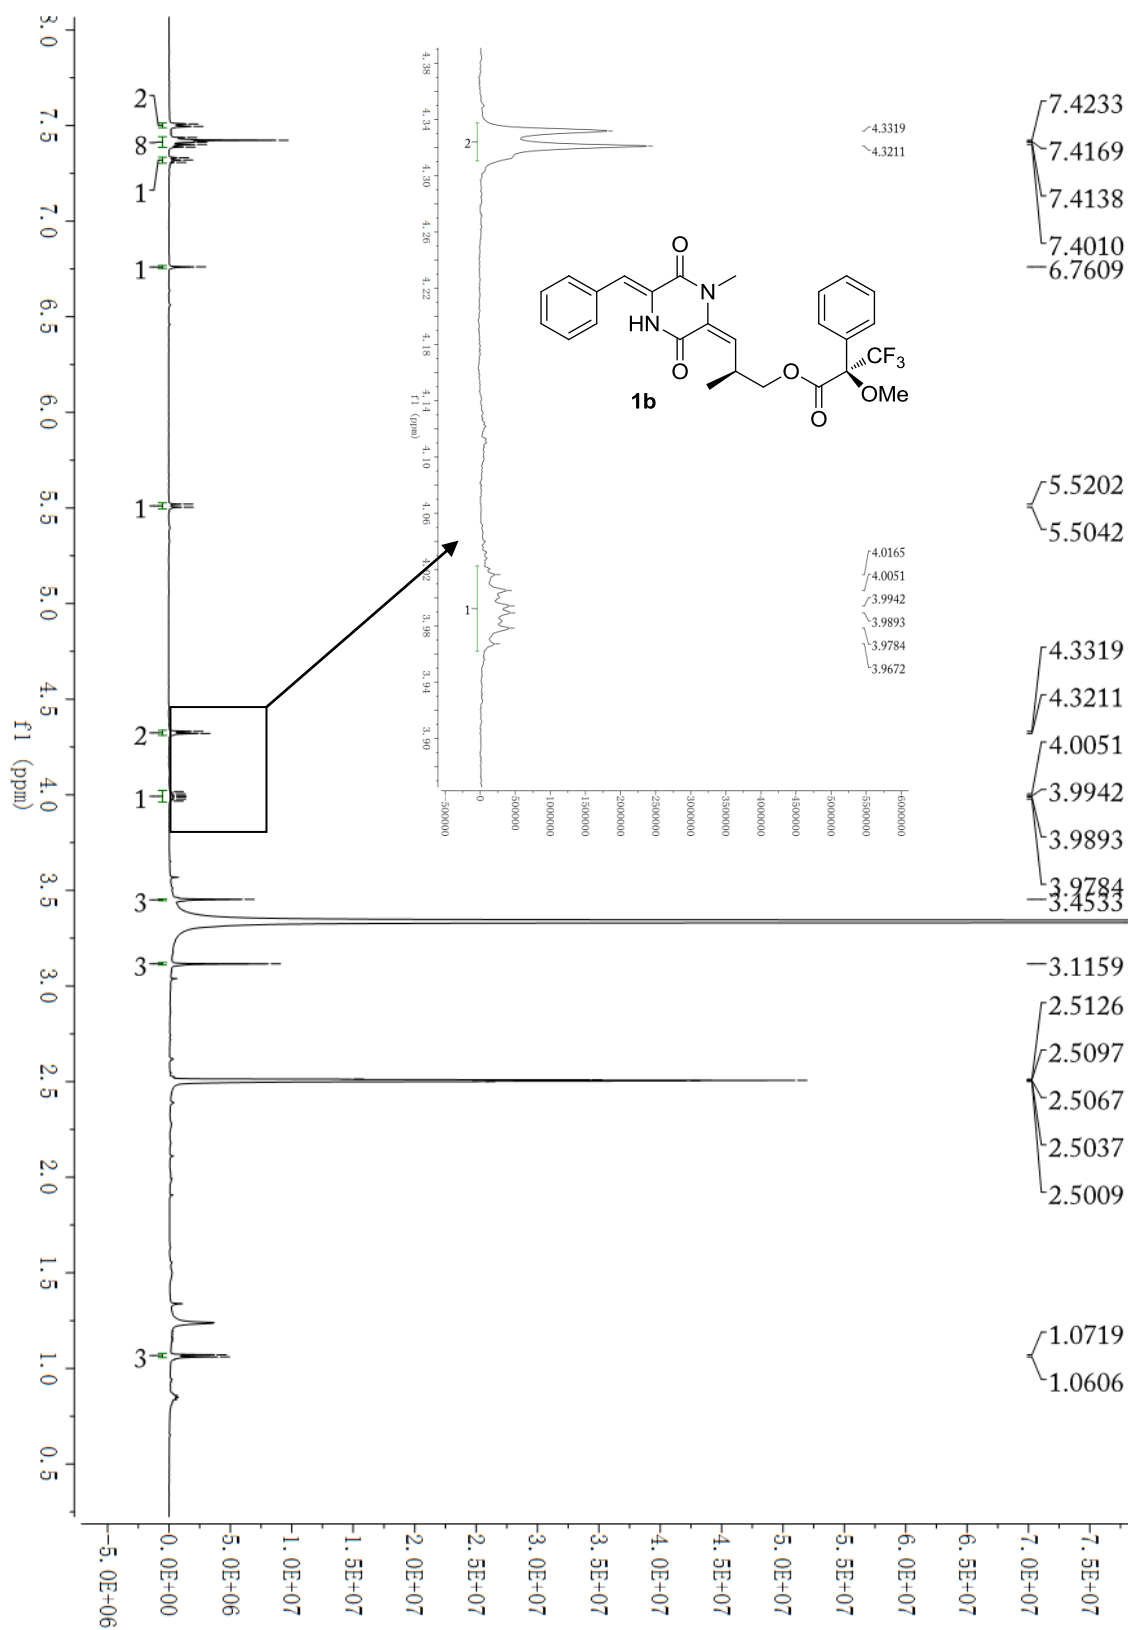



**Figure S34.** The  $^1\text{H}$  NMR (600 MHz,  $\text{DMSO-}d_6$ ) spectrum of (*R*)-**2** MTPA ester (**2b**) in  $\text{DMSO-}d_6$ .

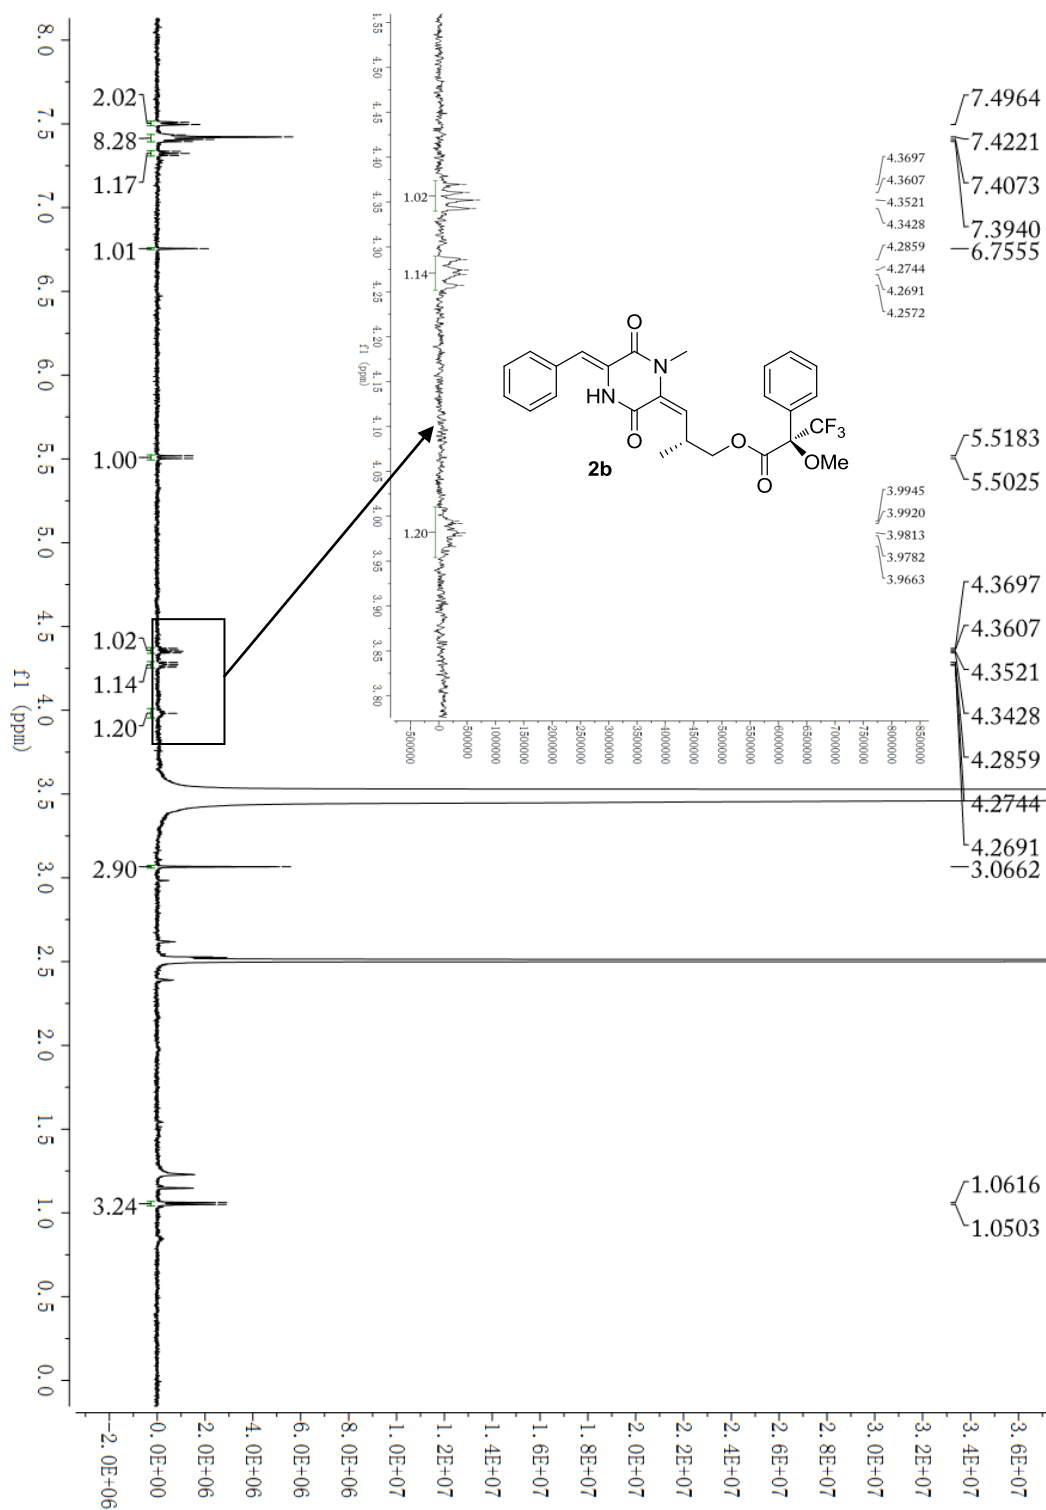

Figure S35. The <sup>1</sup>H NMR (600 MHz, DMSO-d<sub>6</sub>) spectrum of *p*-bromobenzoate (**1c**).

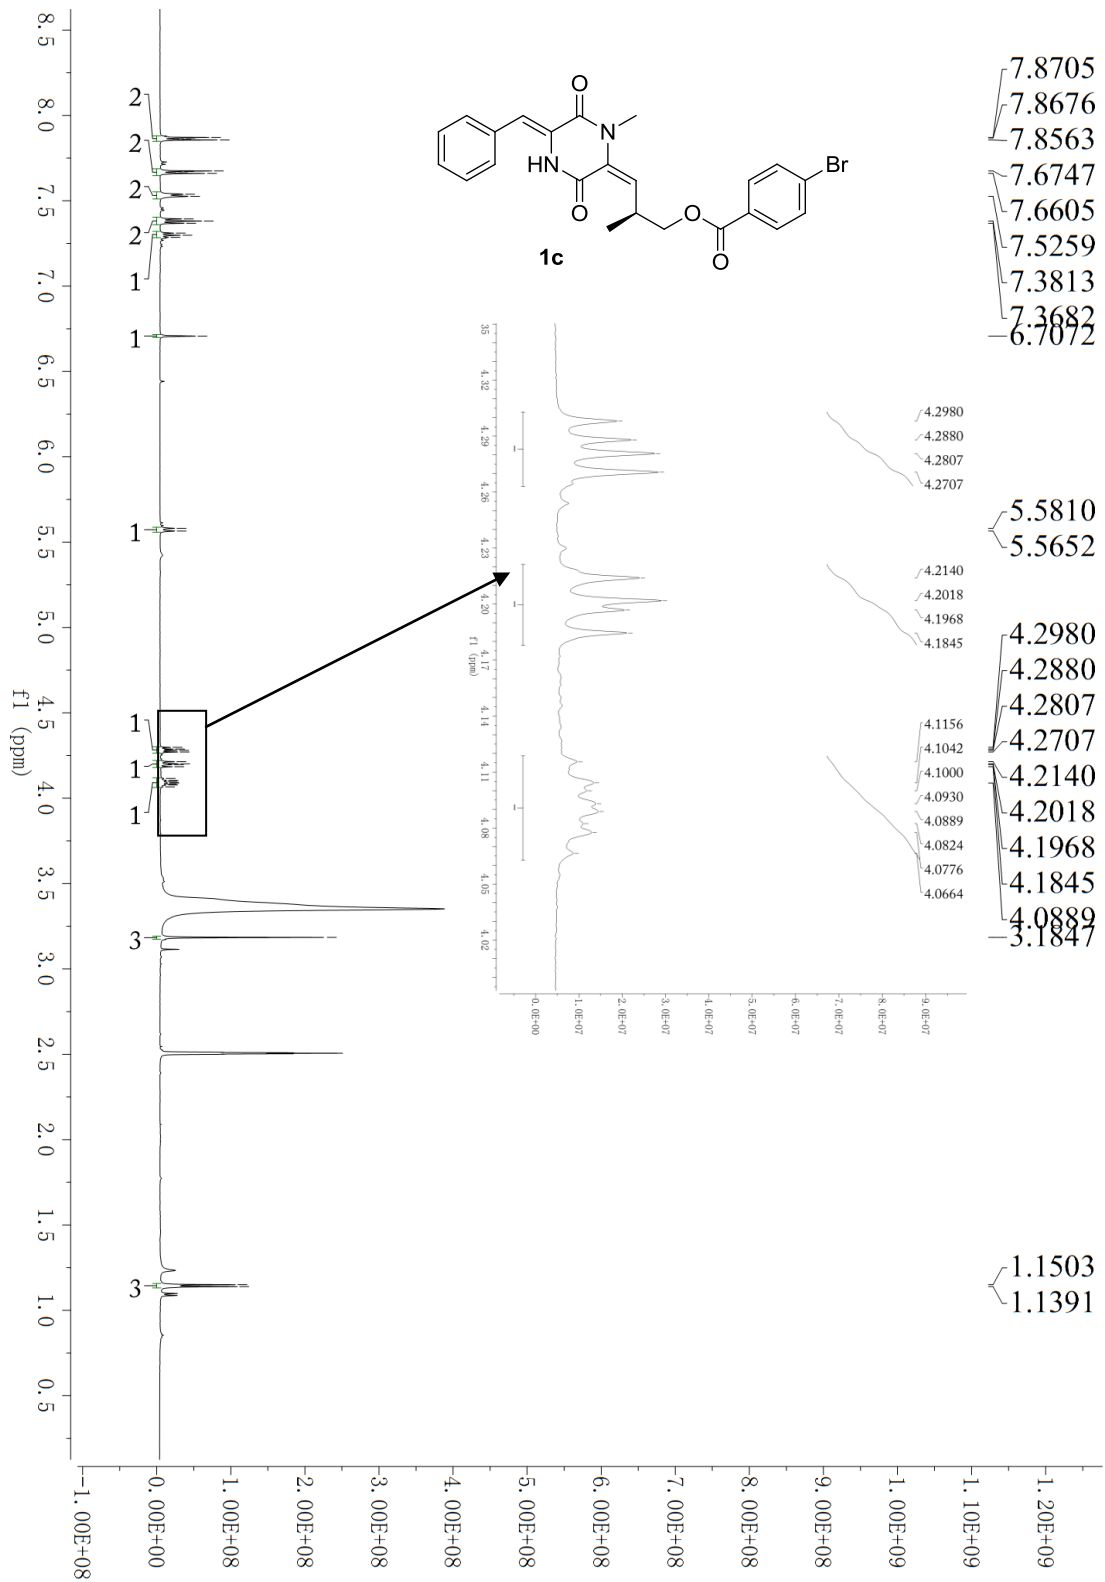

**Figure S36.** The DEPTQ (150 MHz, DMSO-*d*<sub>6</sub>) spectrum of *p*-bromobenzoate (**1c**).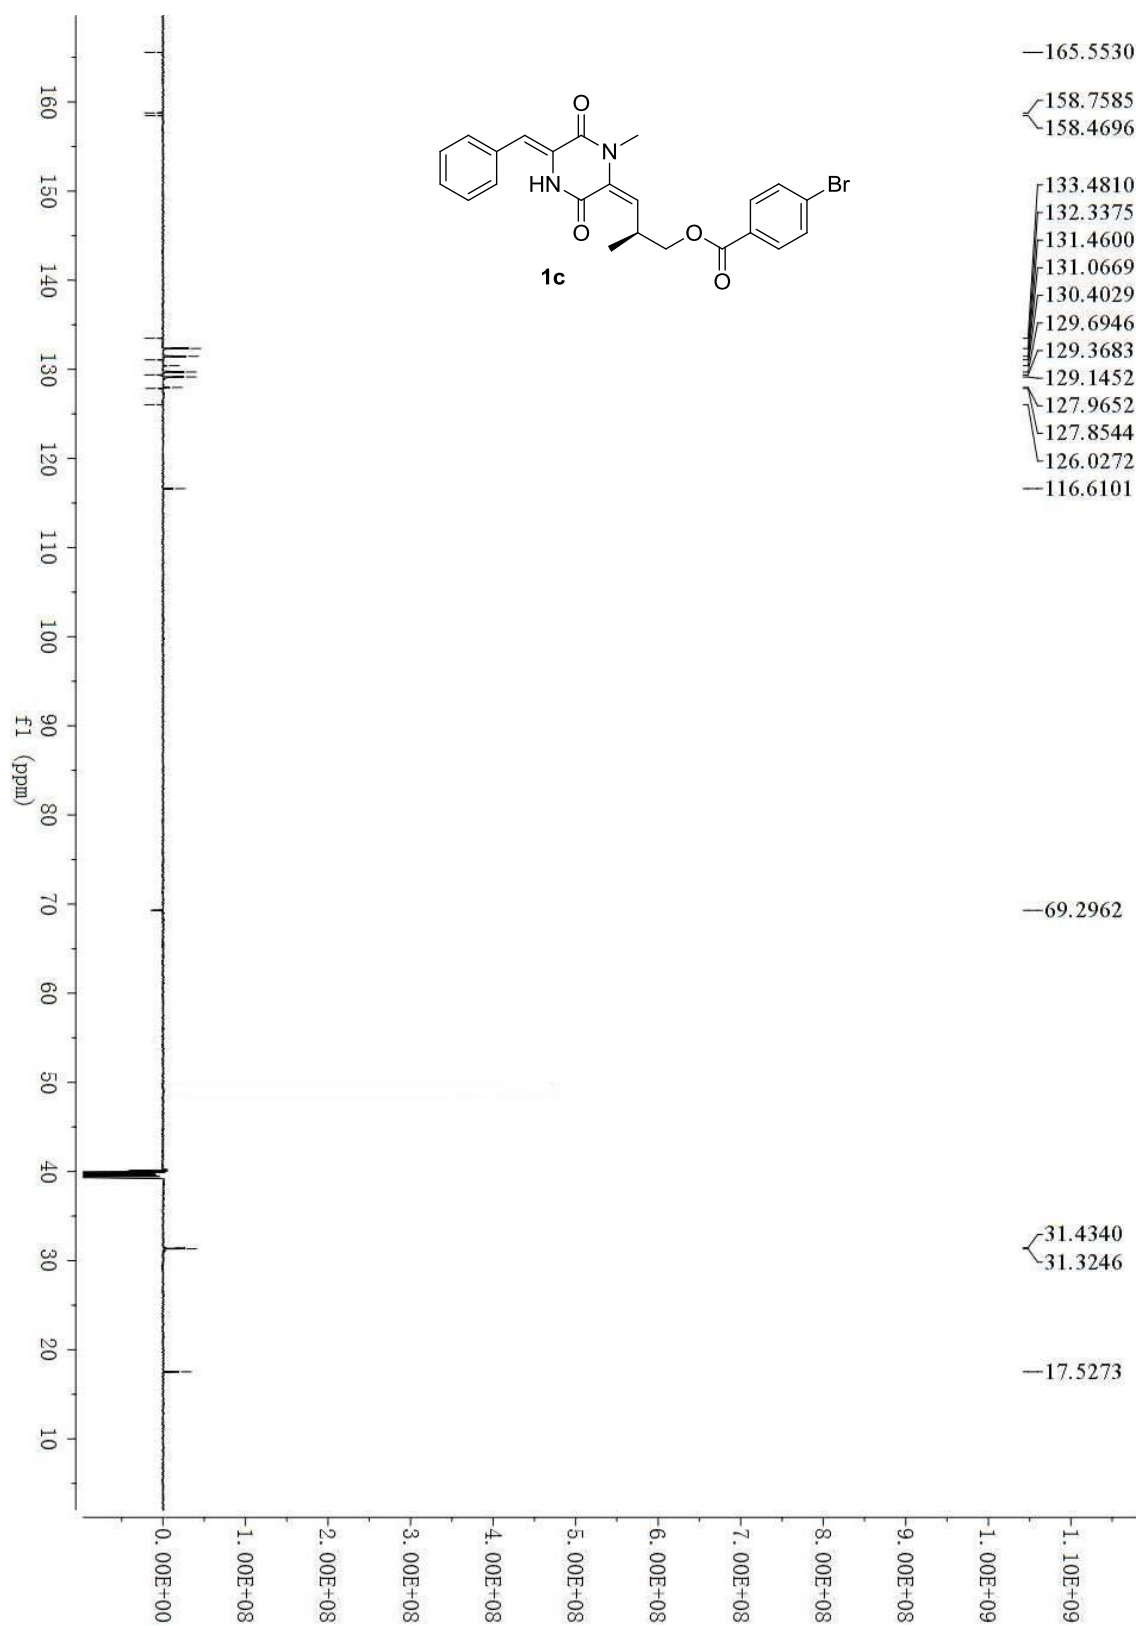



**Figure S37.** The resolution of the racemic mixture of **1/2** by chiral column (CHIRALPAK AY, 4.6 × 150 mm, 0.5 mL/min).

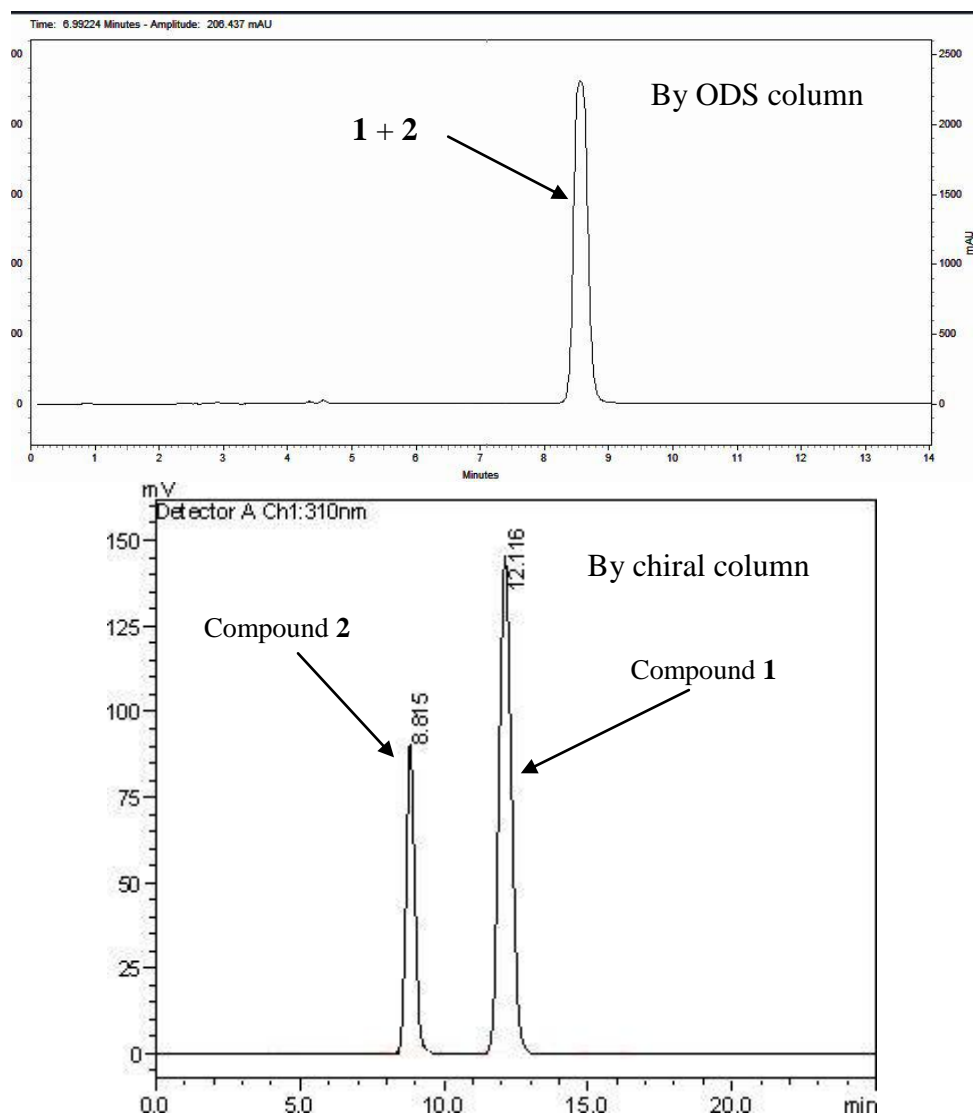

**Figure S38.** Marfey's method applying for compound **5** (ODS column; Solvents: (A) water + 0.2% TFA, (B) MeCN; linear gradient: 0 min, 75% A + 25% B; 40 min, 40% A + 60% B; 45 min, 100% B; temperature, 30 °C; flow rate, 1 mL/min; UV detection at  $\lambda_{\max}$  340 nm; FDAA, 16.0 min).

Co-injection of FDAA derivatives of standard D-Ile with standard D-*allo*-Ile by ODS column

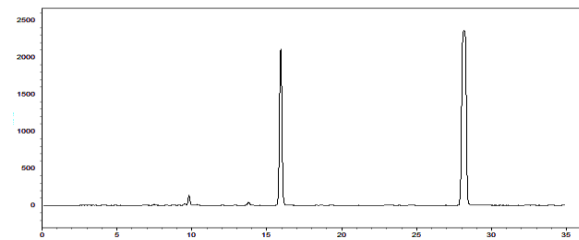

Co-injection of FDAA derivatives of standard L-Ile with standard L-*allo*-Ile by ODS column

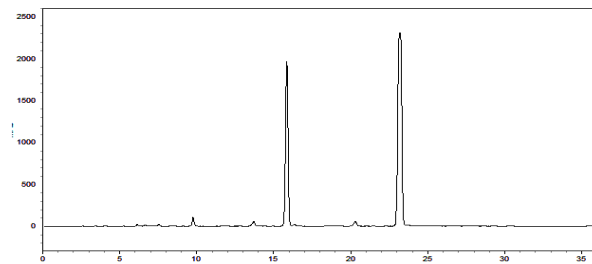

FDAA derivatives of the acid hydrolysate of **5** by ODS column

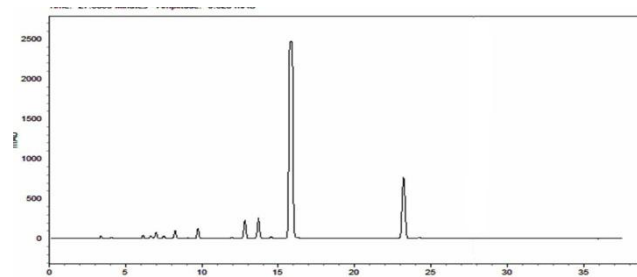

Co-injection of FDAA derivatives of the acid hydrolysates of **5** with standard L-Ile and L-*allo*-Ile by ODS column

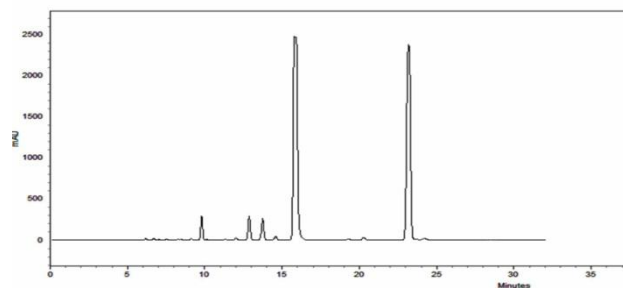

**Figure S39.** C<sub>3</sub> Marfey's method applying for compound **5** (C<sub>3</sub> column; The column was developed with a linear gradient of 15%–60% MeOH/water (+isocratic 5% of a 1% formic acid solution in MeCN, over 55 min; temperature, 50 °C; flow rate, 1 mL/min; UV detection at  $\lambda_{\max}$  340 nm; FDAA, 17.95 min).

Co-injection of FDAA derivatives of standard L-Ile with standard L-*allo*-Ile by C<sub>3</sub> column

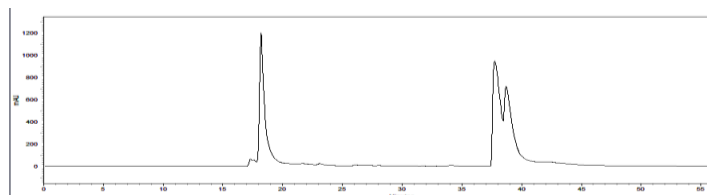

FDAA derivatives of standard L-*allo*-Ile by C<sub>3</sub> column

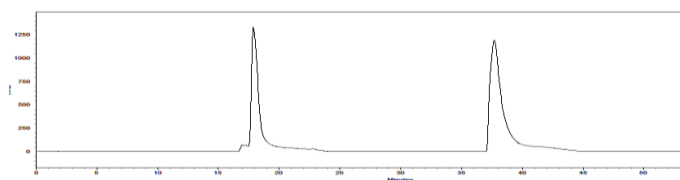

FDAA derivatives of standard L-Ile by C<sub>3</sub> column

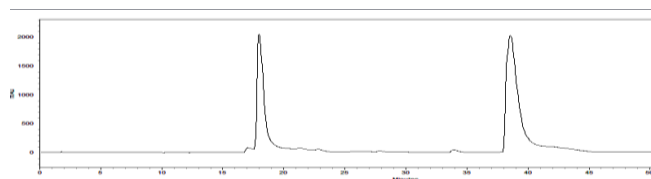

FDAA derivatives of the acid hydrolysate of **5** by C<sub>3</sub> column

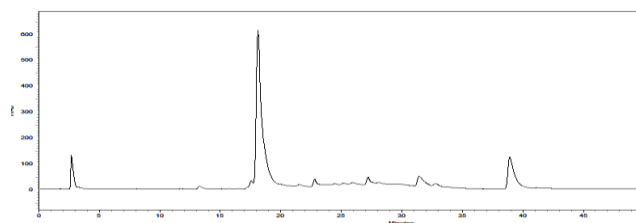

Co-injection of FDAA derivatives of the acid hydrolysates of **5** with standard L-Ile by C<sub>3</sub> column

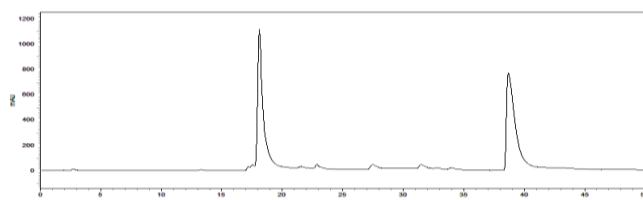

**Figure S40.** Dose-response histograms of antivirus activity for compound **3** and ribavirin ( $p > 0.05$ ).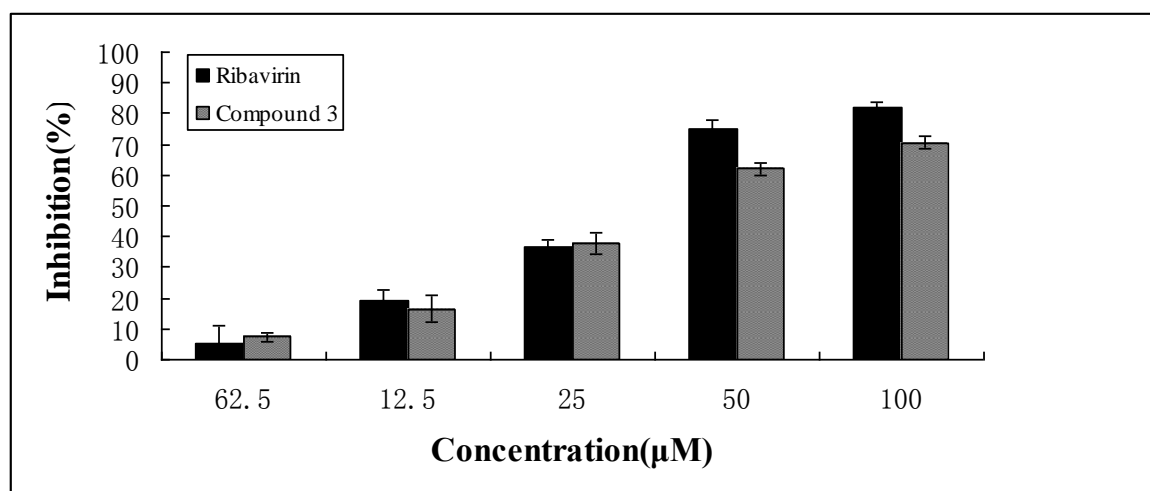**Table S1.** Cytotoxic, anti-virus, anti-microbial and anti-inflammatory activities of **1–10**.

| Compounds     | MIC (μg/mL)     |                     |                      |                    |                  |                    | IC <sub>50</sub> (μM) |                 |                 |                 |                 |
|---------------|-----------------|---------------------|----------------------|--------------------|------------------|--------------------|-----------------------|-----------------|-----------------|-----------------|-----------------|
|               | <i>E. coli</i>  | <i>E. aerogenes</i> | <i>P. aeruginosa</i> | <i>B. subtilis</i> | <i>S. aureus</i> | <i>C. albicans</i> | HL-60                 | K562            | A549            | H1N1            | RAW 264.7       |
| <b>1</b>      | >100            | >100                | >100                 | >100               | >100             | >100               | >100                  | >100            | >100            | 75.5 ± 2.2      | >10             |
| <b>2</b>      | >100            | >100                | >100                 | >100               | >100             | >100               | >100                  | >100            | >100            | >50             | >10             |
| <b>3</b>      | >100            | >100                | >100                 | >100               | >100             | >100               | >100                  | >100            | >100            | 41.1 ± 4.5      | >10             |
| <b>4</b>      | >100            | >100                | >100                 | >100               | >100             | >100               | >100                  | >100            | >100            | 62.6 ± 3.9      | >10             |
| <b>5</b>      | >100            | >100                | >100                 | >100               | >100             | >100               | >100                  | >100            | >100            | 106.5 ± 4.2     | >10             |
| <b>6</b>      | >100            | >100                | >100                 | >100               | >100             | >100               | ND <sup>a</sup>       | ND <sup>a</sup> | ND <sup>a</sup> | 28.9 ± 2.2      | ND <sup>a</sup> |
| <b>7</b>      | >100            | >100                | >100                 | >100               | >100             | >100               | ND <sup>a</sup>       | ND <sup>a</sup> | ND <sup>a</sup> | 6.8 ± 1.5       | ND <sup>a</sup> |
| <b>8</b>      | >100            | >100                | >100                 | >100               | >100             | >100               | ND <sup>a</sup>       | ND <sup>a</sup> | ND <sup>a</sup> | 94.5 ± 3.0      | ND <sup>a</sup> |
| <b>9</b>      | >100            | >100                | >100                 | >100               | >100             | >100               | ND <sup>a</sup>       | ND <sup>a</sup> | ND <sup>a</sup> | 113.8 ± 4.9     | ND <sup>a</sup> |
| <b>10</b>     | >100            | >100                | >100                 | >100               | >100             | >100               | ND <sup>a</sup>       | ND <sup>a</sup> | ND <sup>a</sup> | 156.6 ± 4.0     | ND <sup>a</sup> |
| Ciprofloxacin | 0.05            | 0.19                | 0.1                  | 0.39               | 3.12             | ND <sup>a</sup>    | ND <sup>a</sup>       | ND <sup>a</sup> | ND <sup>a</sup> | ND <sup>a</sup> | ND <sup>a</sup> |
| Ketoconazole  | ND <sup>a</sup> | ND <sup>a</sup>     | ND <sup>a</sup>      | ND <sup>a</sup>    | ND <sup>a</sup>  | 0.024              | ND <sup>a</sup>       | ND <sup>a</sup> | ND <sup>a</sup> | ND <sup>a</sup> | ND <sup>a</sup> |
| PDTC          | ND <sup>a</sup> | ND <sup>a</sup>     | ND <sup>a</sup>      | ND <sup>a</sup>    | ND <sup>a</sup>  | ND <sup>a</sup>    | ND <sup>a</sup>       | ND <sup>a</sup> | ND <sup>a</sup> | ND <sup>a</sup> | <0.1            |
| Adriamycin    | ND <sup>a</sup> | ND <sup>a</sup>     | ND <sup>a</sup>      | ND <sup>a</sup>    | ND <sup>a</sup>  | ND <sup>a</sup>    | 0.652                 | 0.645           | 0.080           | ND <sup>a</sup> | ND <sup>a</sup> |
| Ribavirin     | ND <sup>a</sup> | ND <sup>a</sup>     | ND <sup>a</sup>      | ND <sup>a</sup>    | ND <sup>a</sup>  | ND <sup>a</sup>    | ND <sup>a</sup>       | ND <sup>a</sup> | ND <sup>a</sup> | 38.8 ± 1.5      | ND <sup>a</sup> |

<sup>a</sup> Not detected.

**Table S2.** The HMBC correlations (H → C) for compounds 1–5.

| Proton (position) | Carbon (position) |             |           |         |
|-------------------|-------------------|-------------|-----------|---------|
|                   | 1 and 2           | 3           | 4         | 5       |
| 1                 | 2, 6              | 3, 5        |           | 5       |
| 2                 |                   |             |           |         |
| 3                 |                   |             |           |         |
| 4                 |                   | 2, 6        |           |         |
| 5                 |                   |             |           |         |
| 6                 |                   |             |           |         |
| 7                 | 5, 6, 9, 10       | 5, 6, 9, 10 | 5, 8      |         |
| 8                 | 7, 9, 10          |             |           |         |
| 9                 | 7, 10             | 7, 8        | 7, 8      | 7, 8    |
| 10                | 7, 8, 9           | 7, 8        | 7, 8      | 6, 7, 8 |
| 11                | 2, 13             | 2, 13/17    | 2, 12, 13 | 2, 13   |
| 12                |                   |             |           |         |
| 13/17             | 11, 15            | 11, 15      | 12, 15    | 11, 15  |
| 14/16             | 12, 15            | 12, 15      |           | 12, 15  |
| 15                | 13/17             |             | 12, 13    | 13      |
