# Supplementary material for: Diketopiperazine Derivatives from the Marine-Derived Actinomycete Streptomyces sp. FXJ7.328
Source: MDPI journal article supplement (doi:10.3390/md11041035), 2013-03-28
Supplement: s2 [file s2]

marinedrugs-11-01035-s001.mol
  corina  04151404213D 1   1.00000     0.00000 
CORINA 3.49 0023  12.04.2013
 21 22  0  0  0  0  0  0  0  0999 V2000
    0.0210    1.1460    0.4790 C   0  0  0  0  0  0  0  0  0  0  0  0
    0.0286   -0.0742   -0.1743 C   0  0  0  0  0  0  0  0  0  0  0  0
    1.2092   -0.5886   -0.6817 C   0  0  0  0  0  0  0  0  0  0  0  0
    2.3882    0.1118   -0.5391 C   0  0  0  0  0  0  0  0  0  0  0  0
    2.3890    1.3457    0.1199 C   0  0  0  0  0  0  0  0  0  0  0  0
    1.1916    1.8589    0.6294 C   0  0  0  0  0  0  0  0  0  0  0  0
    2.5087    4.1035   -0.3458 N   0  0  0  0  0  0  0  0  0  0  0  0
    3.6457    3.4452    0.1317 C   0  0  0  0  0  0  0  0  0  0  0  0
    3.6424    2.0993    0.2768 C   0  0  0  0  0  0  0  0  0  0  0  0
    2.4150    5.4441   -0.2188 C   0  0  0  0  0  0  0  0  0  0  0  0
    3.5172    6.1911    0.4201 C   0  0  0  0  0  0  0  0  0  0  0  0
    4.7550    5.5634    0.6094 N   0  0  0  0  0  0  0  0  0  0  0  0
    4.8460    4.2235    0.4752 C   0  0  0  0  0  0  0  0  0  0  0  0
    1.4317    6.0317   -0.6272 O   0  0  0  0  0  0  0  0  0  0  0  0
    1.9480    8.0430    0.8432 C   0  0  0  0  0  0  0  0  0  0  0  0
    3.3353    7.4552    0.8139 C   0  0  0  0  0  0  0  0  0  0  0  0
    5.9138    3.6629    0.6371 O   0  0  0  0  0  0  0  0  0  0  0  0
    1.8296    9.1246   -0.2324 C   0  0  0  0  0  0  0  0  0  0  0  0
    1.6846    8.6602    2.2182 C   0  0  0  0  0  0  0  0  0  0  0  0
    0.3311    9.1137    2.2854 O   0  0  0  0  0  0  0  0  0  0  0  0
    5.9403    6.3543    0.9496 C   0  0  0  0  0  0  0  0  0  0  0  0
  1  2  2  0      
  2  3  1  0      
  3  4  2  0      
  4  5  1  0      
  5  6  2  0      
  6  1  1  0      
  7  8  1  0      
  8  9  2  0      
  9  5  1  0      
  7 10  1  0      
 10 11  1  0      
 11 12  1  0      
 12 13  1  0      
 13  8  1  0      
 10 14  2  0      
 15 16  1  0      
 16 11  2  0      
 13 17  2  0      
 15 18  1  0      
 15 19  1  0      
 19 20  1  0      
 12 21  1  0      
M  END
$$$$
