# Supplementary material for: Diketopiperazine Derivatives from the Marine-Derived Actinomycete Streptomyces sp. FXJ7.328
Source: MDPI journal article supplement (doi:10.3390/md11041035), 2013-03-28
Supplement: s3 [file s3]

marinedrugs-11-01035-s001.mol
  ChemDraw03101420412D

 21 22  0  0  0  0  0  0  0  0999 V2000
   -3.2151    0.6188    0.0000 C   0  0  0  0  0  0  0  0  0  0  0  0
   -3.2151   -0.2062    0.0000 C   0  0  0  0  0  0  0  0  0  0  0  0
   -2.5006   -0.6188    0.0000 C   0  0  0  0  0  0  0  0  0  0  0  0
   -1.7862   -0.2062    0.0000 C   0  0  0  0  0  0  0  0  0  0  0  0
   -1.7862    0.6188    0.0000 C   0  0  0  0  0  0  0  0  0  0  0  0
   -2.5006    1.0313    0.0000 C   0  0  0  0  0  0  0  0  0  0  0  0
   -0.3572   -0.2062    0.0000 N   0  0  0  0  0  0  0  0  0  0  0  0
   -0.3572    0.6188    0.0000 C   0  0  0  0  0  0  0  0  0  0  0  0
   -1.0717    1.0313    0.0000 C   0  0  0  0  0  0  0  0  0  0  0  0
    0.3572   -0.6188    0.0000 C   0  0  0  0  0  0  0  0  0  0  0  0
    1.0717   -0.2062    0.0000 C   0  0  0  0  0  0  0  0  0  0  0  0
    1.0717    0.6188    0.0000 N   0  0  0  0  0  0  0  0  0  0  0  0
    0.3572    1.0313    0.0000 C   0  0  0  0  0  0  0  0  0  0  0  0
    0.3572   -1.4438    0.0000 O   0  0  0  0  0  0  0  0  0  0  0  0
    1.7862   -1.4438    0.0000 C   0  0  0  0  0  0  0  0  0  0  0  0
    1.7862   -0.6188    0.0000 C   0  0  0  0  0  0  0  0  0  0  0  0
    0.3572    1.8563    0.0000 O   0  0  0  0  0  0  0  0  0  0  0  0
    1.0717   -1.8563    0.0000 C   0  0  0  0  0  0  0  0  0  0  0  0
    2.5006   -1.8563    0.0000 C   0  0  0  0  0  0  0  0  0  0  0  0
    3.2151   -1.4438    0.0000 O   0  0  0  0  0  0  0  0  0  0  0  0
    1.7862    1.0313    0.0000 C   0  0  0  0  0  0  0  0  0  0  0  0
  1  2  2  0      
  2  3  1  0      
  3  4  2  0      
  4  5  1  0      
  5  6  2  0      
  6  1  1  0      
  7  8  1  0      
  8  9  2  0      
  9  5  1  0      
  7 10  1  0      
 10 11  1  0      
 11 12  1  0      
 12 13  1  0      
 13  8  1  0      
 10 14  2  0      
 15 16  1  0      
 16 11  2  0      
 13 17  2  0      
 15 18  1  1      
 15 19  1  0      
 19 20  1  0      
 12 21  1  0      
M  END
