# Supplementary material for: Diketopiperazine Derivatives from the Marine-Derived Actinomycete Streptomyces sp. FXJ7.328
Source: MDPI journal article supplement (doi:10.3390/md11041035), 2013-03-28
Supplement: s4 [file s4]

marinedrugs-11-01035-s002.mol
  corina  04151404213D 1   1.00000     0.00000 
CORINA 3.49 0023  12.04.2013
 21 22  0  0  0  0  0  0  0  0999 V2000
    0.0184    1.1475    0.4768 C   0  0  0  0  0  0  0  0  0  0  0  0
    0.0259   -0.0721   -0.1775 C   0  0  0  0  0  0  0  0  0  0  0  0
    1.2067   -0.5867   -0.6843 C   0  0  0  0  0  0  0  0  0  0  0  0
    2.3859    0.1131   -0.5403 C   0  0  0  0  0  0  0  0  0  0  0  0
    2.3867    1.3465    0.1196 C   0  0  0  0  0  0  0  0  0  0  0  0
    1.1891    1.8598    0.6286 C   0  0  0  0  0  0  0  0  0  0  0  0
    2.5087    4.1041   -0.3472 N   0  0  0  0  0  0  0  0  0  0  0  0
    3.6446    3.4453    0.1323 C   0  0  0  0  0  0  0  0  0  0  0  0
    3.6403    2.0994    0.2780 C   0  0  0  0  0  0  0  0  0  0  0  0
    2.4156    5.4447   -0.2210 C   0  0  0  0  0  0  0  0  0  0  0  0
    3.5173    6.1914    0.4192 C   0  0  0  0  0  0  0  0  0  0  0  0
    4.7544    5.5631    0.6106 N   0  0  0  0  0  0  0  0  0  0  0  0
    4.8449    4.2231    0.4771 C   0  0  0  0  0  0  0  0  0  0  0  0
    1.4333    6.0327   -0.6312 O   0  0  0  0  0  0  0  0  0  0  0  0
    1.9483    8.0439    0.8409 C   0  0  0  0  0  0  0  0  0  0  0  0
    3.3355    7.4558    0.8121 C   0  0  0  0  0  0  0  0  0  0  0  0
    5.9120    3.6619    0.6409 O   0  0  0  0  0  0  0  0  0  0  0  0
    1.8298    9.1242   -0.2360 C   0  0  0  0  0  0  0  0  0  0  0  0
    0.4834    9.6001   -0.2871 O   0  0  0  0  0  0  0  0  0  0  0  0
    5.9397    6.3535    0.9521 C   0  0  0  0  0  0  0  0  0  0  0  0
    1.6852    8.6627    2.2153 C   0  0  0  0  0  0  0  0  0  0  0  0
  1  2  2  0      
  2  3  1  0      
  3  4  2  0      
  4  5  1  0      
  5  6  2  0      
  6  1  1  0      
  7  8  1  0      
  8  9  2  0      
  9  5  1  0      
  7 10  1  0      
 10 11  1  0      
 11 12  1  0      
 12 13  1  0      
 13  8  1  0      
 10 14  2  0      
 15 16  1  0      
 16 11  2  0      
 13 17  2  0      
 15 18  1  0      
 18 19  1  0      
 12 20  1  0      
 15 21  1  0      
M  END
$$$$
