# Supplementary material for: Diketopiperazine Derivatives from the Marine-Derived Actinomycete Streptomyces sp. FXJ7.328
Source: MDPI journal article supplement (doi:10.3390/md11041035), 2013-03-28
Supplement: s6 [file s6]

marinedrugs-11-01035-s003.mol
  corina  04151404213D 1   1.00000     0.00000 
CORINA 3.49 0023  12.04.2013
 20 21  0  0  0  0  0  0  0  0999 V2000
    0.6327    0.9308    0.8360 C   0  0  0  0  0  0  0  0  0  0  0  0
    0.6185   -0.3106    0.2111 C   0  0  0  0  0  0  0  0  0  0  0  0
    1.7084   -0.7265   -0.5443 C   0  0  0  0  0  0  0  0  0  0  0  0
    2.8088    0.0904   -0.6778 C   0  0  0  0  0  0  0  0  0  0  0  0
    2.8283    1.3419   -0.0509 C   0  0  0  0  0  0  0  0  0  0  0  0
    1.7280    1.7557    0.7091 C   0  0  0  0  0  0  0  0  0  0  0  0
    2.5548    4.1110   -0.3541 N   0  0  0  0  0  0  0  0  0  0  0  0
    3.8376    3.5614   -0.2540 C   0  0  0  0  0  0  0  0  0  0  0  0
    4.0000    2.2178   -0.1895 C   0  0  0  0  0  0  0  0  0  0  0  0
    2.3787    5.4306   -0.1307 C   0  0  0  0  0  0  0  0  0  0  0  0
    3.5445    6.2697    0.2125 C   0  0  0  0  0  0  0  0  0  0  0  0
    4.8366    5.7685    0.0097 N   0  0  0  0  0  0  0  0  0  0  0  0
    5.0078    4.4496   -0.2197 C   0  0  0  0  0  0  0  0  0  0  0  0
    3.3682    7.4967    0.7118 C   0  0  0  0  0  0  0  0  0  0  0  0
    4.5555    8.2965    1.1826 C   0  0  0  0  0  0  0  0  0  0  0  0
    4.7674    9.4914    0.2509 C   0  0  0  0  0  0  0  0  0  0  0  0
    6.1242    3.9988   -0.3974 O   0  0  0  0  0  0  0  0  0  0  0  0
    1.2701    5.9240   -0.2118 O   0  0  0  0  0  0  0  0  0  0  0  0
    4.3009    8.7981    2.6055 C   0  0  0  0  0  0  0  0  0  0  0  0
   -0.4641   -1.1202    0.3395 O   0  0  0  0  0  0  0  0  0  0  0  0
  1  2  2  0      
  2  3  1  0      
  3  4  2  0      
  4  5  1  0      
  5  6  2  0      
  6  1  1  0      
  7  8  1  0      
  8  9  2  0      
  9  5  1  0      
  7 10  1  0      
 10 11  1  0      
 11 12  1  0      
 12 13  1  0      
 13  8  1  0      
 11 14  2  0      
 14 15  1  0      
 15 16  1  0      
 13 17  2  0      
 10 18  2  0      
 15 19  1  0      
  2 20  1  0      
M  END
$$$$
