# Supplementary material for: Diketopiperazine Derivatives from the Marine-Derived Actinomycete Streptomyces sp. FXJ7.328
Source: MDPI journal article supplement (doi:10.3390/md11041035), 2013-03-28
Supplement: s8 [file s8]

marinedrugs-11-01035-s004.mol
  corina  04151404213D 1   1.00000     0.00000 
CORINA 3.49 0023  12.04.2013
 18 19  0  0  0  0  0  0  0  0999 V2000
    0.0434    1.6023    0.1084 C   0  0  0  0  0  0  0  0  0  0  0  0
   -0.0150    0.2242    0.0378 N   0  0  0  0  0  0  0  0  0  0  0  0
    2.5659    0.5089    0.6431 N   0  0  0  0  0  0  0  0  0  0  0  0
    2.4376    1.8248    0.1823 C   0  0  0  0  0  0  0  0  0  0  0  0
    1.2111    2.4069    0.1098 C   0  0  0  0  0  0  0  0  0  0  0  0
    3.7253   -0.1536    0.4449 C   0  0  0  0  0  0  0  0  0  0  0  0
    4.8369    0.5248   -0.2520 C   0  0  0  0  0  0  0  0  0  0  0  0
    4.7929    1.9138   -0.4268 N   0  0  0  0  0  0  0  0  0  0  0  0
    3.6328    2.5718   -0.2211 C   0  0  0  0  0  0  0  0  0  0  0  0
    5.8754   -0.1801   -0.7110 C   0  0  0  0  0  0  0  0  0  0  0  0
    7.0070    0.5194   -1.4190 C   0  0  0  0  0  0  0  0  0  0  0  0
    8.2737    0.4329   -0.5653 C   0  0  0  0  0  0  0  0  0  0  0  0
    7.2560   -0.1527   -2.7707 C   0  0  0  0  0  0  0  0  0  0  0  0
    3.5789    3.7790   -0.3701 O   0  0  0  0  0  0  0  0  0  0  0  0
    3.8534   -1.2978    0.8367 O   0  0  0  0  0  0  0  0  0  0  0  0
   -1.2648    2.0386    0.1713 C   0  0  0  0  0  0  0  0  0  0  0  0
   -2.0514    0.9613    0.1387 N   0  0  0  0  0  0  0  0  0  0  0  0
   -1.3189   -0.1192    0.0647 C   0  0  0  0  0  0  0  0  0  0  0  0
  1  2  1  0      
  3  4  1  0      
  4  5  2  0      
  5  1  1  0      
  3  6  1  0      
  6  7  1  0      
  7  8  1  0      
  8  9  1  0      
  9  4  1  0      
  7 10  2  0      
 10 11  1  0      
 11 12  1  0      
 11 13  1  0      
  9 14  2  0      
  6 15  2  0      
  1 16  2  0      
 16 17  1  0      
 17 18  2  0      
 18  2  1  0      
M  END
$$$$
