# Supplementary material for: Diketopiperazine Derivatives from the Marine-Derived Actinomycete Streptomyces sp. FXJ7.328
Source: MDPI journal article supplement (doi:10.3390/md11041035), 2013-03-28
Supplement: s9 [file s9]

marinedrugs-11-01035-s004.mol
  ChemDraw03101420432D

 18 19  0  0  0  0  0  0  0  0999 V2000
   -1.8659    0.4125    0.0000 C   0  0  0  0  0  0  0  0  0  0  0  0
   -1.8659   -0.4125    0.0000 N   0  0  0  0  0  0  0  0  0  0  0  0
   -0.4369   -0.4125    0.0000 N   0  0  0  0  0  0  0  0  0  0  0  0
   -0.4369    0.4125    0.0000 C   0  0  0  0  0  0  0  0  0  0  0  0
   -1.1514    0.8250    0.0000 C   0  0  0  0  0  0  0  0  0  0  0  0
    0.2775   -0.8250    0.0000 C   0  0  0  0  0  0  0  0  0  0  0  0
    0.9920   -0.4125    0.0000 C   0  0  0  0  0  0  0  0  0  0  0  0
    0.9920    0.4125    0.0000 N   0  0  0  0  0  0  0  0  0  0  0  0
    0.2775    0.8250    0.0000 C   0  0  0  0  0  0  0  0  0  0  0  0
    1.7065   -0.8250    0.0000 C   0  0  0  0  0  0  0  0  0  0  0  0
    2.4209   -0.4125    0.0000 C   0  0  0  0  0  0  0  0  0  0  0  0
    2.4209    0.4125    0.0000 C   0  0  0  0  0  0  0  0  0  0  0  0
    3.1354   -0.8250    0.0000 C   0  0  0  0  0  0  0  0  0  0  0  0
    0.2775    1.6500    0.0000 O   0  0  0  0  0  0  0  0  0  0  0  0
    0.2775   -1.6500    0.0000 O   0  0  0  0  0  0  0  0  0  0  0  0
   -2.6505    0.6674    0.0000 C   0  0  0  0  0  0  0  0  0  0  0  0
   -3.1354    0.0000    0.0000 N   0  0  0  0  0  0  0  0  0  0  0  0
   -2.6505   -0.6674    0.0000 C   0  0  0  0  0  0  0  0  0  0  0  0
  1  2  1  0      
  3  4  1  0      
  4  5  2  0      
  5  1  1  0      
  3  6  1  0      
  6  7  1  0      
  7  8  1  0      
  8  9  1  0      
  9  4  1  0      
  7 10  2  0      
 10 11  1  0      
 11 12  1  0      
 11 13  1  0      
  9 14  2  0      
  6 15  2  0      
  1 16  2  0      
 16 17  1  0      
 17 18  2  0      
 18  2  1  0      
M  END
