# Supplementary material for: Diketopiperazine Derivatives from the Marine-Derived Actinomycete Streptomyces sp. FXJ7.328
Source: MDPI journal article supplement (doi:10.3390/md11041035), 2013-03-28
Supplement: s10 [file s10]

marinedrugs-11-01035-s005.mol
  corina  04151404213D 1   1.00000     0.00000 
CORINA 3.49 0023  12.04.2013
 19 20  0  0  0  0  0  0  0  0999 V2000
    0.1476    1.1984   -0.9513 C   0  0  0  0  0  0  0  0  0  0  0  0
    0.0270   -0.0258   -0.3168 C   0  0  0  0  0  0  0  0  0  0  0  0
    1.0832   -0.5421    0.4135 C   0  0  0  0  0  0  0  0  0  0  0  0
    2.2652    0.1608    0.5144 C   0  0  0  0  0  0  0  0  0  0  0  0
    2.3950    1.3985   -0.1238 C   0  0  0  0  0  0  0  0  0  0  0  0
    1.3230    1.9134   -0.8599 C   0  0  0  0  0  0  0  0  0  0  0  0
    2.4303    4.2114   -0.1513 N   0  0  0  0  0  0  0  0  0  0  0  0
    3.6397    3.5044   -0.1156 C   0  0  0  0  0  0  0  0  0  0  0  0
    3.6526    2.1552   -0.0209 C   0  0  0  0  0  0  0  0  0  0  0  0
    2.4162    5.4928   -0.5509 C   0  0  0  0  0  0  0  0  0  0  0  0
    3.6454    6.2114   -1.0142 C   0  0  0  0  0  0  0  0  0  0  0  0
    4.8709    5.5501   -0.5908 N   0  0  0  0  0  0  0  0  0  0  0  0
    4.8968    4.2696   -0.1846 C   0  0  0  0  0  0  0  0  0  0  0  0
    3.6272    6.2885   -2.5422 C   0  0  0  0  0  0  0  0  0  0  0  0
    4.8785    7.0209   -3.0308 C   0  0  0  0  0  0  0  0  0  0  0  0
    4.9236    6.9892   -4.5598 C   0  0  0  0  0  0  0  0  0  0  0  0
    2.3804    7.0481   -2.9997 C   0  0  0  0  0  0  0  0  0  0  0  0
    5.9506    3.7458    0.1237 O   0  0  0  0  0  0  0  0  0  0  0  0
    1.3628    6.0941   -0.5365 O   0  0  0  0  0  0  0  0  0  0  0  0
  1  2  2  0      
  2  3  1  0      
  3  4  2  0      
  4  5  1  0      
  5  6  2  0      
  6  1  1  0      
  7  8  1  0      
  8  9  2  0      
  9  5  1  0      
  7 10  1  0      
 10 11  1  0      
 12 13  1  0      
 13  8  1  0      
 11 14  1  0      
 14 15  1  0      
 15 16  1  0      
 14 17  1  0      
 13 18  2  0      
 10 19  2  0      
 11 12  1  0      
M  END
$$$$
