# Supplementary material for: Diketopiperazine Derivatives from the Marine-Derived Actinomycete Streptomyces sp. FXJ7.328
Source: MDPI journal article supplement (doi:10.3390/md11041035), 2013-03-28
Supplement: s12 [file s12]

marinedrugs-11-01035-s006.mol
  corina  04151404223D 1   1.00000     0.00000 
CORINA 3.49 0023  12.04.2013
 20 21  0  0  0  0  0  0  0  0999 V2000
   -0.0702    1.3985   -0.8528 C   0  0  0  0  0  0  0  0  0  0  0  0
   -0.2483    0.2031   -0.1783 C   0  0  0  0  0  0  0  0  0  0  0  0
    0.7679   -0.3160    0.6050 C   0  0  0  0  0  0  0  0  0  0  0  0
    1.9668    0.3553    0.7191 C   0  0  0  0  0  0  0  0  0  0  0  0
    2.1547    1.5639    0.0406 C   0  0  0  0  0  0  0  0  0  0  0  0
    1.1229    2.0818   -0.7490 C   0  0  0  0  0  0  0  0  0  0  0  0
    2.2746    4.3722   -0.0743 N   0  0  0  0  0  0  0  0  0  0  0  0
    3.4609    3.6321    0.0199 C   0  0  0  0  0  0  0  0  0  0  0  0
    3.4307    2.2868    0.1572 C   0  0  0  0  0  0  0  0  0  0  0  0
    2.3104    5.6399   -0.5141 C   0  0  0  0  0  0  0  0  0  0  0  0
    3.5735    6.3074   -0.9625 C   0  0  0  0  0  0  0  0  0  0  0  0
    4.7659    5.6250   -0.4818 N   0  0  0  0  0  0  0  0  0  0  0  0
    4.7417    4.3580   -0.0350 C   0  0  0  0  0  0  0  0  0  0  0  0
    3.6023    6.3358   -2.4919 C   0  0  0  0  0  0  0  0  0  0  0  0
    2.6958    6.8136   -2.8636 H   0  0  0  0  0  0  0  0  0  0  0  0
    5.7700    3.8142    0.3212 O   0  0  0  0  0  0  0  0  0  0  0  0
    1.2754    6.2715   -0.5503 O   0  0  0  0  0  0  0  0  0  0  0  0
    4.8251    7.1246   -2.9645 C   0  0  0  0  0  0  0  0  0  0  0  0
    4.9389    7.0253   -4.4870 C   0  0  0  0  0  0  0  0  0  0  0  0
    4.6733    8.5920   -2.5590 C   0  0  0  0  0  0  0  0  0  0  0  0
  1  2  2  0      
  2  3  1  0      
  3  4  2  0      
  4  5  1  0      
  5  6  2  0      
  6  1  1  0      
  7  8  1  0      
  8  9  2  0      
  9  5  1  0      
  7 10  1  0      
 10 11  1  0      
 12 13  1  0      
 13  8  1  0      
 14 15  1  0      
 13 16  2  0      
 10 17  2  0      
 12 11  1  0      
 11 14  1  0      
 18 19  1  0      
 18 20  1  0      
 14 18  1  0      
M  END
$$$$
