# Supplementary material for: Diketopiperazine Derivatives from the Marine-Derived Actinomycete Streptomyces sp. FXJ7.328
Source: MDPI journal article supplement (doi:10.3390/md11041035), 2013-03-28
Supplement: s13 [file s13]

marinedrugs-11-01035-s006.mol
  ChemDraw04151416202D

 20 21  0  0  0  0  0  0  0  0999 V2000
   -2.8578    0.7166    0.0000 C   0  0  0  0  0  0  0  0  0  0  0  0
   -2.8578   -0.1085    0.0000 C   0  0  0  0  0  0  0  0  0  0  0  0
   -2.1433   -0.5209    0.0000 C   0  0  0  0  0  0  0  0  0  0  0  0
   -1.4289   -0.1085    0.0000 C   0  0  0  0  0  0  0  0  0  0  0  0
   -1.4289    0.7166    0.0000 C   0  0  0  0  0  0  0  0  0  0  0  0
   -2.1433    1.1291    0.0000 C   0  0  0  0  0  0  0  0  0  0  0  0
    0.0000   -0.1085    0.0000 N   0  0  0  0  0  0  0  0  0  0  0  0
    0.0000    0.7166    0.0000 C   0  0  0  0  0  0  0  0  0  0  0  0
   -0.7144    1.1291    0.0000 C   0  0  0  0  0  0  0  0  0  0  0  0
    0.7144   -0.5209    0.0000 C   0  0  0  0  0  0  0  0  0  0  0  0
    1.4289   -0.1085    0.0000 C   0  0  0  0  0  0  0  0  0  0  0  0
    1.4289    0.7166    0.0000 N   0  0  0  0  0  0  0  0  0  0  0  0
    0.7144    1.1291    0.0000 C   0  0  0  0  0  0  0  0  0  0  0  0
    2.1434   -0.5209    0.0000 C   0  0  0  0  0  0  0  0  0  0  0  0
    2.8578   -0.1085    0.0000 H   0  0  0  0  0  0  0  0  0  0  0  0
    0.7144    1.9540    0.0000 O   0  0  0  0  0  0  0  0  0  0  0  0
    0.7144   -1.3459    0.0000 O   0  0  0  0  0  0  0  0  0  0  0  0
    2.1474   -1.3706    0.0000 C   0  0  0  0  0  0  0  0  0  0  0  0
    2.7308   -1.9540    0.0000 C   0  0  0  0  0  0  0  0  0  0  0  0
    1.4330   -1.7831    0.0000 C   0  0  0  0  0  0  0  0  0  0  0  0
  1  2  2  0      
  2  3  1  0      
  3  4  2  0      
  4  5  1  0      
  5  6  2  0      
  6  1  1  0      
  7  8  1  0      
  8  9  2  0      
  9  5  1  0      
  7 10  1  0      
 10 11  1  0      
 12 13  1  0      
 13  8  1  0      
 14 15  1  0      
 13 16  2  0      
 10 17  2  0      
 12 11  1  0      
 11 14  1  1      
 18 19  1  0      
 18 20  1  0      
 14 18  1  0      
M  END
