# Supplementary material for: Diketopiperazine Derivatives from the Marine-Derived Actinomycete Streptomyces sp. FXJ7.328
Source: MDPI journal article supplement (doi:10.3390/md11041035), 2013-03-28
Supplement: s14 [file s14]

marinedrugs-11-01035-s007.mol
  corina  04151404223D 1   1.00000     0.00000 
CORINA 3.49 0023  12.04.2013
 20 21  0  0  0  0  0  0  0  0999 V2000
    0.1280    1.4478   -0.1480 C   0  0  0  0  0  0  0  0  0  0  0  0
    0.2070    0.0951    0.1074 C   0  0  0  0  0  0  0  0  0  0  0  0
    1.0461   -0.7115   -0.6685 C   0  0  0  0  0  0  0  0  0  0  0  0
    1.7989   -0.1377   -1.6985 C   0  0  0  0  0  0  0  0  0  0  0  0
    1.7087    1.2165   -1.9412 C   0  0  0  0  0  0  0  0  0  0  0  0
    0.8762    2.0078   -1.1689 C   0  0  0  0  0  0  0  0  0  0  0  0
    1.1367   -2.1552   -0.4025 C   0  0  0  0  0  0  0  0  0  0  0  0
    2.3416   -2.7723   -0.4190 C   0  0  0  0  0  0  0  0  0  0  0  0
    3.5781   -1.9788   -0.4954 C   0  0  0  0  0  0  0  0  0  0  0  0
    3.5517   -0.7813   -0.2812 O   0  0  0  0  0  0  0  0  0  0  0  0
    2.4182   -4.1667   -0.3576 N   0  0  0  0  0  0  0  0  0  0  0  0
    3.5808   -4.7819   -0.6604 C   0  0  0  0  0  0  0  0  0  0  0  0
    4.7517   -3.9699   -1.0483 C   0  0  0  0  0  0  0  0  0  0  0  0
    4.7422   -2.5881   -0.8043 N   0  0  0  0  0  0  0  0  0  0  0  0
    3.6635   -5.9943   -0.6137 O   0  0  0  0  0  0  0  0  0  0  0  0
    6.6037   -6.8770   -1.3155 C   0  0  0  0  0  0  0  0  0  0  0  0
    5.7106   -5.9553   -2.1483 C   0  0  0  0  0  0  0  0  0  0  0  0
    5.8121   -4.5471   -1.6215 C   0  0  0  0  0  0  0  0  0  0  0  0
    6.1654   -5.9875   -3.6088 C   0  0  0  0  0  0  0  0  0  0  0  0
    5.9831   -1.8140   -0.8895 C   0  0  0  0  0  0  0  0  0  0  0  0
  1  2  2  0      
  2  3  1  0      
  3  4  2  0      
  4  5  1  0      
  5  6  2  0      
  6  1  1  0      
  3  7  1  0      
  7  8  2  0      
  8  9  1  0      
  9 10  2  0      
  8 11  1  0      
 11 12  1  0      
 12 13  1  0      
 13 14  1  0      
 14  9  1  0      
 12 15  2  0      
 16 17  1  0      
 17 18  1  0      
 18 13  2  0      
 17 19  1  0      
 14 20  1  0      
M  END
$$$$
