# Supplementary material for: Diketopiperazine Derivatives from the Marine-Derived Actinomycete Streptomyces sp. FXJ7.328
Source: MDPI journal article supplement (doi:10.3390/md11041035), 2013-03-28
Supplement: s15 [file s15]

marinedrugs-11-01035-s007.mol
  ChemDraw03101420442D

 20 21  0  0  0  0  0  0  0  0999 V2000
   -2.1434    2.2687    0.0000 C   0  0  0  0  0  0  0  0  0  0  0  0
   -2.1434    1.4437    0.0000 C   0  0  0  0  0  0  0  0  0  0  0  0
   -1.4289    1.0312    0.0000 C   0  0  0  0  0  0  0  0  0  0  0  0
   -0.7145    1.4437    0.0000 C   0  0  0  0  0  0  0  0  0  0  0  0
   -0.7145    2.2687    0.0000 C   0  0  0  0  0  0  0  0  0  0  0  0
   -1.4289    2.6812    0.0000 C   0  0  0  0  0  0  0  0  0  0  0  0
   -1.4289    0.2063    0.0000 C   0  0  0  0  0  0  0  0  0  0  0  0
   -0.7145   -0.2062    0.0000 C   0  0  0  0  0  0  0  0  0  0  0  0
    0.0000    0.2063    0.0000 C   0  0  0  0  0  0  0  0  0  0  0  0
    0.0000    1.0312    0.0000 O   0  0  0  0  0  0  0  0  0  0  0  0
   -0.7145   -1.0312    0.0000 N   0  0  0  0  0  0  0  0  0  0  0  0
    0.0000   -1.4437    0.0000 C   0  0  0  0  0  0  0  0  0  0  0  0
    0.7145   -1.0312    0.0000 C   0  0  0  0  0  0  0  0  0  0  0  0
    0.7145   -0.2062    0.0000 N   0  0  0  0  0  0  0  0  0  0  0  0
    0.0000   -2.2687    0.0000 O   0  0  0  0  0  0  0  0  0  0  0  0
    0.7145   -2.6812    0.0000 C   0  0  0  0  0  0  0  0  0  0  0  0
    1.4289   -2.2687    0.0000 C   0  0  0  0  0  0  0  0  0  0  0  0
    1.4289   -1.4437    0.0000 C   0  0  0  0  0  0  0  0  0  0  0  0
    2.1434   -2.6812    0.0000 C   0  0  0  0  0  0  0  0  0  0  0  0
    1.4289    0.2063    0.0000 C   0  0  0  0  0  0  0  0  0  0  0  0
  1  2  2  0      
  2  3  1  0      
  3  4  2  0      
  4  5  1  0      
  5  6  2  0      
  6  1  1  0      
  3  7  1  0      
  7  8  2  0      
  8  9  1  0      
  9 10  2  0      
  8 11  1  0      
 11 12  1  0      
 12 13  1  0      
 13 14  1  0      
 14  9  1  0      
 12 15  2  0      
 16 17  1  0      
 17 18  1  0      
 18 13  2  0      
 17 19  1  0      
 14 20  1  0      
M  END
